1 ***Lifespan associated global***  
2 ***patterns of coherent neural***  
3 ***communication***

4 **Bikash Sahoo<sup>1\*\*</sup>; Anagh Pathak<sup>1\*\*</sup>; Gustavo Deco<sup>2</sup>, Arpan Banerjee<sup>1\*</sup>;**  
5 **Dipanjan Roy<sup>1\*</sup>**

6

7 <sup>1</sup> Cognitive Brain Dynamics Lab National Brain Research Centre (NBRC), NH8 Nainwal Mode  
8 122051 Manesar, Haryana, India

9 <sup>2</sup> Institució Catalana de la Recerca i Estudis Avançats (ICREA), Universitat Pompeu Fabra,  
10 Passeig Lluís, Companys 23, Barcelona, 08010, Spain

11 \*\* Equal contributions

12 \*corresponding authors

13 **[dipanjan.nbrc@gov.in](mailto:dipanjan.nbrc@gov.in); [arpan@nbrc.ac.in](mailto:arpan@nbrc.ac.in)**

14 **Keywords:** Healthy Ageing, Peak Alpha, Global coherence, Metastability, Multifrequency

15

16

17 **Abstract**

18 Healthy ageing is accompanied by changes to spontaneous electromagnetic oscillations. At the  
19 macroscopic scale, previous studies have quantified the basic features, e.g., power and  
20 frequencies in rhythms of interest from the perspective of attention, perception, learning and  
21 memory. On the other hand, signatures and modes of neural communication have recently been  
22 argued to be identifiable from global measures applied on neuro-electromagnetic data such as  
23 global coherence that quantifies the degree of togetherness of distributed neural oscillations and  
24 metastability that parametrizes the transient dynamics of the network switching between  
25 successive stable states. Here, we demonstrate that global coherence and metastability can be  
26 informative measures to track healthy ageing dynamics over lifespan and together with the  
27 traditional spectral measures provides an attractive explanation of neuronal information  
28 processing. Finding normative patterns of brain rhythms in resting state MEG would naturally  
29 pave the way for tracking task relevant metrics that could crucially determine cognitive flexibility  
30 and performance. While previously reported observations of a reduction in peak alpha frequency  
31 and increased beta power in older adults are reflective of changes at individual sensors (during  
32 rest and task), global coherence and metastability truly pinpoint the underlying coordination  
33 dynamics over multiple brain areas across the entire lifespan. In addition to replication of the  
34 previous observations in a substantially larger lifespan cohort than what was previously reported,  
35 we also demonstrate, for the first time to the best of our knowledge, age related changes in  
36 coherence and metastability in signals over time scales of neuronal processing. Furthermore, we  
37 observed a marked frequency dependence in changes in global coordination dynamics, which,  
38 coupled with the long held view of specific frequency bands sub-serving different aspects of  
39 cognition, hints at differential functional processing roles for slower and faster brain dynamics.

40

## 41 Introduction:

42

43 A comprehensive understanding and characterization of the process of healthy aging are  
44 essential to treat age-associated neurological changes such as the decline in working memory,  
45 processing speeds, and executive cognitive functioning. Over the years, converging lines of  
46 evidence have successfully demonstrated the role of neural oscillations in many cognitive  
47 domains. Specific neuronal oscillatory patterns observed in EEG/ MEG data are essential markers  
48 of cognition (Buzsaki 2011), and researchers overwhelmingly agree on the use of field potential  
49 to tap neuro-cognitive processes associated with human brain function (Pesaran et al., 2018).  
50 Accordingly, several recent studies have tried to track age-related changes in the brain's  
51 oscillatory profile using spectral estimation techniques. For example, the amplitude of resting and  
52 motor-related beta-band oscillations (16-25 Hz) is typically found to be higher in the older  
53 population compared to the younger population. Similarly, a substantial number of reports have  
54 highlighted that spontaneous peak alpha frequency (8-12 Hz) is lower in older people as  
55 compared to younger participants.

56

57 While age-related alterations in sensor specific features like power and frequency are fairly well-  
58 reported, very few studies have looked at changes in global patterns of frequency-specific  
59 synchronization in the context of healthy aging. We argue that much information about the  
60 mechanisms of aging is to be found in studying patterns of coherent activity across the lifespan.  
61 The relevance of this assumption can be assessed from the existing literature. For example, the  
62 theory of communication through coherence (CTC) posits that message passing across spatially  
63 distant neural assemblies demands coordinated fluctuations in their respective excitabilities  
64 (Fries, 2005). The importance of global coherence in the context of cognitive functioning is  
65 underscored by the essential need for efficient message passing in bringing about cognition. Even  
66 though the original CTC proposal was formulated in a task context, recent work has drawn out its  
67 repercussions for spontaneous brain dynamics, a.k.a resting-state activity (Deco et al.,2016).  
68 According to this formulation, resting brain activity frequently traverses across different functional  
69 configurations to maintain a state of maximal readiness in anticipation of external stimuli, which,  
70 when presented, collapses the state of the brain to whichever configuration is deemed most  
71 relevant in the stimulus context. In other words, resting-state brain activity must demonstrate  
72 metastable dynamics, whereby the brain fluidly recapitulates varied patterns of coherent activity  
73 (Deco et al.,2016). In line with this view, global metastability is found to be associated with

74 cognitive flexibility and information processing in the brain. Therefore, tracking changes in  
75 coherence and metastability is crucial, given the fact that aging is marked by distinct cognitive  
76 changes that are, in turn, orchestrated by coherent neural oscillations.

77

78 The fundamental objective of this article is to track lifespan associated patterns of global  
79 coherence and metastability from neurophysiological recordings. As a necessary confirmation  
80 step, we first replicate the already well-established results in the field of aging neuroscience- the  
81 observations of reduced peak alpha frequency and an increase in average beta power with age  
82 on the current dataset. In doing so, we successfully establish the validity of earlier observations  
83 on a substantially larger dataset across the age continuum - a feature lacking in many previous  
84 studies. We then utilize a standard measure of global coherence to characterize band-specific  
85 lifespan trends. Finally, we apply a proxy for metastability - the standard deviation of the Kuramoto  
86 order parameter to characterize age-related alterations in frequency-specific metastable brain  
87 dynamics. Resting-state magnetoencephalogram (MEG) recordings from the Cambridge-Ageing  
88 Neuroscience (Cam-CAN) group for our purposes. Since this analysis has been carried out on a  
89 large cohort of an aging population (cross-sectional) consisting of 650 participants across an age  
90 range of 18-88 years we can consider them as a normative pattern of temporal structure of brain  
91 rhythms associated with ageing. The relevance of the global network metrics we further evaluated  
92 vis-à-vis performance in visual short term memory (VSTM) tasks over lifespan. Thus, we could  
93 summarize the organization of band specific coordinated brain dynamics over lifespan.

## 94 **Methods**

### 95 **Participants**

96 Cam-CAN is a multi-modal, cross-sectional adult life-span population-based study. The study was  
97 approved by the Cambridgeshire 2 Research Ethics Committee, and all participants have given  
98 written informed consent. The data presented here belonged to Stage 2 of the study. In Stage-1,  
99 2681 participants had been home-interviewed and had gone through neuropsychological  
100 assessments and been tested for vision, balance, hearing and speeded response. Participants  
101 with poor vision (< 20/50 on Snellen test), poor hearing (threshold greater than 35 dB at 1000 Hz  
102 in both ears), past history of drug abuse, with any psychiatric illness such as bipolar disorder,  
103 schizophrenia, with neurological disease e.g. epilepsy, stroke, traumatic brain injury, or a score  
104 less than 25 in Mini-Mental State Examination were excluded from further behavioral and  
105 neuroimaging experiments. 700 participants had been screened from Stage 1 to Stage 2, of which  
106 Magnetoencephalogram (MEG) data from 650 subjects were available.

107

### 108 **Data acquisition**

109

110 Data used in the preparation of this work were obtained from the CamCAN repository (available  
111 at <http://www.mrc-cbu.cam.ac.uk/datasets/camcan/>) (Taylor et al., 2016, Shafto et al., 2015). For  
112 all the subjects, MEG data were collected using a 306-sensor (102 magnetometers and 204  
113 orthogonal planar magnetometers) VectorView MEG System by Elekta Neuromag, Helsinki,  
114 located at MRC-CBSU. Data were digitized at 1 kHz with a high pass filter of cutoff 0.03 Hz. Head  
115 position was monitored continuously using four Head Position Indicator coils. Horizontal and  
116 vertical electrooculogram were recorded using two pairs of bipolar electrodes. One pair of bipolar  
117 electrodes were used to record electrocardiogram for pulse-related artifact removal during offline  
118 analysis. The data presented here consisted only of resting state, where the subject sat still with  
119 their eyes closed for a minimum duration of 8 minutes and 40 seconds.

120

### 121 **Data preprocessing**

122

123 Preprocessed data was provided by Cam-CAN research consortium, where for each run temporal  
124 signal space separation was applied to remove noise from the environment, from Head Position  
125 Indicator coils, line noise and for the detection and reconstruction of the signal from noisy sensors.  
126 All the data had been transformed into a common head-position. More details about data

127 acquisition and preprocessing have been presented elsewhere (Taylor et al., 2017; Shafto et al.,  
128 2014).  
129

## 130 **Data analysis**

### 131 **Welch spectrum**

132  
133 Fieldtrip toolbox (Oostenveld et al.,2011) was used to read the data provided in '.fif' format. For  
134 each individual, data were downsampled from 1 kHz to 250 Hz. First, we sought to investigate  
135 age-specific changes in the spectral densities of the raw MEG signals.  
136

137 Time series corresponding to the 102 magnetometers, resulted in a matrix  $X$  of size  $102 \times T$ ,  
138 where  $T$  corresponds to the number of time points. Power spectral density for each sensor  $c$ 's time  
139 series  $x_c(t)$  was estimated using Welch's periodogram method. Each time series was divided into  
140 segments of 20 seconds without any overlap between segments. Spectrum was estimated for  
141 each segment after multiplying the time series segment with a Hanning window. Spectrums of all  
142 the segments were finally averaged.  
143

144 We estimated a global spectrum, representative of each subject i.e.  $S_I(f)$  by taking a grand  
145 average across the spectrums belonging to all magnetometers.

$$146 \quad S_I(f) = \sum_c s_I(c, f) \quad (1)$$

147

### 148 ***Quantification of spatial overlap between sources of alpha and beta activity in the sensor*** 149 ***space***

150

151 For each subject, the sensor map of alpha and beta activity were normalized separately.

$$152 \quad \hat{\alpha}_I(c) = \frac{\alpha_I(c) - \langle \alpha_I \rangle}{\sigma_{\alpha(I)}} \quad (2)$$

$$153 \quad \hat{\beta}_I(c) = \frac{\beta_I(c) - \langle \beta_I \rangle}{\sigma_{\beta(I)}} \quad (3)$$

154

155 where  $\sigma_{\alpha(I)}$  and  $\sigma_{\beta(I)}$  are the standard deviations of alpha and beta band respectively.

156 Separation between the normalized sensor level representation  $\hat{\alpha}_I$  and  $\hat{\beta}_I$  was indexed by the  
157 cosine angle between the two multidimensional vectors.

158 
$$\hat{\theta}(\alpha, \beta) = \cos^{-1} \left( \frac{\hat{\alpha}_I \hat{\beta}_I}{|\hat{\alpha}_I| |\hat{\beta}_I|} \right) \quad (4)$$

159

160 The angular separations across age were statistically analyzed using Spearman rank correlations  
161 and t-tests.

162

### 163 **Global coherence**

164

165 We calculated band-specific global coherence to measure the covariation of neural oscillations  
166 on a global level (Cimenser et al., 2008; Kumar et al., 2016). Global coherence among sensors at  
167 any frequency  $f$  is measured as the percentage of variance explained by the first eigenvector of  
168 the cross spectral density matrix at  $f$ .

169

170 In an individual subject's data, for each sensor, the time series  $x(t)$  was divided into  $N$  non-  
171 overlapping windows of 5 seconds duration each i.e.  $y(t)$ . This resulted in an average of 112  
172 (median, Interquartile range 1, range 70-220) windows for each subject. We employed 3  
173 orthogonal discrete prolate spheroidal sequences (Slepian tapers) to avoid leakage in spectral  
174 estimates into nearby frequency bands. The time-bandwidth product was taken to be 2, which  
175 resulted in a bandwidth of 0.4 Hz.

176

177 Before computing FFT, each data segment was detrended i.e. from each data segment  $y(t)$  the  
178 best straight line fit was regressed out.

179 
$$\hat{y}(t) = y(t) - \underline{y}(t) \quad (5)$$

180

181 where  $\underline{y}(t)$  is the straight line fit of  $y(t)$ . Each segment was multiplied with a set of 3 orthogonal  
182 Slepian tapers and fast Fourier transform was applied to the tapered segments.

183 Computing the complex FFT (for  $T$  tapers) at frequency  $f$  for each segment  $n$  of sensor  $c$  resulted  
184 in a complex matrix  $Y$  of dimension  $F \times C \times N \times T$ . We utilized the chronux (Bokil et al., 2010)  
185 library to perform the global coherence analysis.

186

187 Cross spectral density between two sensors was estimated from  $\hat{Y}$  by using the formula

188 
$$S_f(i, j) = \frac{1}{N} \sum_n \sum_T \text{conj} \left( \hat{Y}(f, i, n, T) \right) \hat{Y}(f, j, n, T) \quad (6)$$

189 where  $i$  and  $j$  are the channel indices,  $f$  is the frequency index  $n$  is the segment index and  $T$  is the  
190 taper.

191  
192 Singular value decomposition was applied to the cross spectral density matrix  $S_f$  for each  
193 frequency value  $f$ .

$$194 \quad S_f = USU^T \quad (7)$$

195 Diagonals of  $S$  would be proportional to the explained variance by the orthogonal set of  
196 eigenvectors  $U$ . The values of  $S$  were normalized so that each entry denote the percentage of the  
197 net variance explained in  $S_f$ .

$$198 \quad \hat{S} = \frac{S}{\sum_i S_i} \quad (8)$$

199 The first entry of  $\hat{S}$  is defined as the global coherence. Global coherence was computed for each  
200 frequency value  $f$ , resulting an array  $G$  of length  $F$ .

## 201 **Metastability**

202  
203 We calculated the metastability measure for all participants across all magnetometer sensors.  
204 Metastability is defined as variability of the Kuramoto Order parameter,  $R(t)$ , which is given as,

$$205 \quad R(t)e^{i\psi(t)} = \frac{1}{N} \sum_{n=1}^N e^{i\varphi_n(t)} \quad (9)$$

206 Where  $\varphi_n$  is the phase of the  $n^{th}$  oscillator and  $\psi$  is the mean phase of the system of oscillators.  
207 In this analysis, every MEG sensor is conceptualized as a coupled oscillator, summarized by its  
208 instantaneous phase  $\phi(t)$ . At any given point of time, the phase of each oscillator is extracted  
209 and projected onto a polar coordinate system, as a unit vector ( $e^{i\varphi_n(t)}$ ). The length of the resultant  
210 vector, obtained from averaging all the unit vectors is interpreted as the Kuramoto Order  
211 parameter,  $R(t)$ . The temporal variability of  $R(t)$  is measured by the standard deviation  $\sigma(R(t))$ ,  
212 and defined as metastability (Deco et.al.,2017).

213  
214 As a first step, the pre-processed resting state time series was band-pass filtered so as to obtain  
215 filtered time series. Instantaneous phase of each filtered band was estimated from the filtered  
216 data for metastability calculation. The pass band for the band-pass filtering step was kept narrow  
217 so that the resulting phase is readily interpretable.

218  
219 As a first step, the pre-processed resting state time series was band-pass filtered so as to obtain



220 filtered time series. Instantaneous phase of each filtered band was estimated from the filtered  
221 data for metastability calculation. The pass band for the band-pass filtering step was kept narrow  
222 so that the resulting phase is readily interpretable. For this analysis, each time series was filtered  
223 in the following frequency bands- 2-4 Hz, 3-7 Hz, 8-12 Hz. Since valid phase estimation requires  
224 narrow pass bands, the beta band was further split into 2 sub-bands-16-20Hz and 20-25Hz and  
225 the respective metastability averaged. As mentioned earlier, the choice of frequency bands was  
226 dictated by phase considerations. An additional criterion was to chunk the frequency bands so  
227 that they map onto well-known frequency bands such as delta, theta, alpha and beta. As  
228 mentioned earlier, we restricted our analysis to below 40 Hz due to presence of HPI noise.

229  
230 FieldTrip toolbox (ft\_preproc\_bandpassfilter.m) was used to band-pass filter each signal in the  
231 appropriate frequency bands. This routine was used to implement a finite impulse response (FIR),  
232 two-pass filter that preserves phase information of the time series.

233  
234 Subsequently, instantaneous phase was estimated by using built-in MATLAB implementation of  
235 the Hilbert transform (hilbert.m). The resulting phase time series for each channel and participant  
236 was used to calculate band and subject specific metastability.

237  
238 Similar to the preceding analysis, metastability analysis was performed by 1.) treating age as a  
239 continuous variable 2.) binning participants in the following age brackets - 18-35 years (Young  
240 Adults), 36-50 years (Middle Age), 51-65 years (Middle Elderly) and 66 -88 years (Elderly).

241  
242 For the region-wise analysis, the brain was segmented into 5 non-overlapping regions (frontal,  
243 centro-parietal, occipital, left and right temporal). Metastability index was calculated individually  
244 for all regions separately by randomly sampling 14 sensors from each region. Metastability was  
245 tracked as a function of age by calculating the Spearman rank correlations.

246

## 247 **Statistical Analysis**

248

### 249 **Continuous and categorical analysis of aging data**

250

251 In order to bring all aspects of age-associated neural communication we performed both  
252 continuous and categorical analysis of the aforementioned brain measures with age as an

253 explanatory variable. The primary goal of the continuous analysis was to capture the pattern  
254 change over lifespan (e.g., whether changes of the patterns are increasing/ decreasing). For this  
255 analysis we divided the whole cohort into bins of 5 years starting from 18 years. The bins were  
256 non-overlapping and the center of each bin was considered as the representative age value of  
257 the bin.

258

259 On the other hand, in the categorical analysis decomposing the whole data into cohorts with age  
260 ranges 18-35, 36-50, 51-64 & 66-88 allowed us to get finer and accurate insights in each stage  
261 of the adult span which has been well-documented in the fMRI literature (Chan et al., 2014) as  
262 well as the results obtained here can be contextualized with previous studies. The age ranges  
263 were unequally chosen because of the limitations posed by the CAM-CAN data set where different  
264 numbers of samples in each age group are available. However, in order to keep a reasonable  
265 number of samples > 120 in each cohort we chose the bins accordingly.

266

## 267 **Regression analysis**

268

269 Linear regression analysis was performed by separately considering each of the 5 estimated  
270 measures (Power, Global Coherence, Metastability, PAF and Topographical segregation Index)  
271 as response variables, while keeping age as the explanatory(continuous) variable.

272

$$273 \quad y = \beta_0 + \beta_1 * Age \quad (11)$$

274

275 Linear regression was performed using the fitlm.m matlab procedure, which yielded an omnibus  
276 F-statistic, regression coefficients and goodness of fit( $R^2$ ) and log-likelihood(L). The regression  
277 coefficient was taken to represent effect size. Additionally, we also considered 2nd and 3rd  
278 order polynomial fits such as-

279

$$280 \quad y = \beta_0 + \beta_1 * Age + \beta_2 * Age^2 \quad (12)$$

$$281 \quad y = \beta_0 + \beta_1 * Age + \beta_2 * Age^2 + \beta_3 * Age^3 \quad (13)$$

282

283 Akaike Information Criteria was used for model selection and was calculated as-

$$284 \quad AIC = -2L + 2K \quad (14)$$

285 Where K is the number of model parameters including the intercept.

286

287 For the analysis that report spearman correlations, Effect sizes were computed using cohen's d

$$288 \quad d = \left| \frac{2r}{\sqrt{1-r^2}} \right| \quad (15)$$

289

290 (Reported in Supplementary Material in detail)

291

## 292 **Categorical Analysis**

293

294 To systematically evaluate the relationship between age and brain measures Power, Coherence,  
295 metastability, PAF and Topographical segregation we used Spearman correlation analysis  
296 following what was described at Khan et al., 2018. Except for the logarithm of power, the other  
297 measures are not guaranteed to be following a Gaussian or normal distribution, hence a common  
298 non-parametric test, Spearman correlation was chosen to evaluate all correlations in this article.

299

300 In brief, pairwise comparisons between groups were performed using permutation testing. In each  
301 iteration the groups were collapsed and random draws were made to form random groups.  
302 Difference of means was calculated for the random group assignments and the procedure  
303 repeated for 10000 iterations to construct a surrogate distribution. Finally, significance was  
304 estimated using the surrogate distribution. The statistics were reported in terms of p-values, effect  
305 sizes and difference of means.

306

## 307 Results

308 Our analysis strategy was two-fold. First, we conducted a categorical analysis by chunking the  
309 age-continuum into discrete groups (see Table 1). We have divided the age values of total N=650  
310 subjects into four age groups: Young Adults (YA), Middle Elderly (ME), Middle Late (ML), Older  
311 Adults (OA), for which the demographic information has been provided in **Table 1**. Earlier studies  
312 have done similar grouping (Chan et al 2014) and care was taken such that we have sufficient  
313 number of participants in each age group > 120. Subsequently, we considered age to be a  
314 continuous variable with bins consisting of 5 years between 18-88 and performed linear and  
315 polynomial regression to estimate age associated trends. The bins were non-overlapping and the  
316 center of each bin was considered as the representative age value of the bin.

317

### 318 Age trajectories in MEG resting state brain dynamics

319

320 We studied the effect of healthy ageing on the fundamental properties of the endogenous band-  
321 limited neural oscillations such as amplitude and center frequency. Since the Head Position  
322 Indicator (HPI) coil related noise can be unreliable at higher frequencies, we concentrated our  
323 analysis between 0-40Hz which fully contains the neural oscillations in the **Delta** (1-3Hz), **Theta**  
324 (4-8Hz), **Alpha** (8-12Hz), and **Beta** (16-25Hz) frequency bands.

325

### 326 **Band limited power**

327 An omnibus ANOVA that considers age as the explanatory variable yielded significance for all  
328 measures tested (**details reported in Supplementary material**). Our analysis revealed that  
329 spectral power in **Delta** ( $\beta = 0.008, p = 0.1$ ), **Theta** ( $\beta = 0.004, p = 0.46$ ) and **Alpha** ( $\beta =$   
330  $0.0002, p = 0.76$ ) bands did not vary with age (**see Fig 1**). In contrast, beta band power varied  
331 significantly with age ( $\beta = 0.03, p < 0.0001$ ). Visual inspection of **Fig. 1d** seemed to suggest 18-  
332 22 to be an outlier group, so we additionally removed that group and compared linear and 2nd  
333 order polynomial fits for the beta band and found the 2nd order polynomial fit to be better (AIC  
334 linear = 2722, AIC quadratic = 2718). Alpha band power was estimated by averaging the  
335 estimated spectral values within 8-12 Hz. We further quantified age-effects in the beta band using  
336 a categorical approach and found significant differences in group means between YA vs ME, YA  
337 vs ML, YA vs OA and ME vs OA groups.

338

339

340 **Peak alpha frequency (PAF) shifts with age**

341  
342 The center frequency in the alpha band (8-12 Hz) has long been studied in the context of healthy  
343 and pathological aging (**see Fig 2**). Here, we sought to quantify age related variations in PAF by  
344 averaging the center frequency across the 102 sensors and correlating the global mean with age  
345 as a variable. The regression analysis confirmed age-related reduction in PAF ( $\beta = -0.01, p <$   
346  $0.0001$ ). Frequency value at which there was maximum activity in the alpha band i.e. 8-12 Hz for  
347 a subject, was taken to be the peak alpha frequency of that subject. **Fig 1B** is an age-spectrogram  
348 which shows variation in the power spectral density in the alpha band with age.  
349 Next, we split the age-range into discrete categories and performed permutation tests to estimate  
350 group differences across age groups. YA was found to differ significantly with ME, ML and OA  
351 whereas the ME group differed from OA in terms of the sample means (effect sizes reported in  
352 Supplementary Materials).

353  
354 **Topographical distribution alpha and beta band power**

355  
356 Next, we investigated the spatial topographies of whole brain networks corresponding to age-  
357 related difference along slow and fast time scales of neuronal signal using subspace analysis  
358 borrowed from linear algebra. We quantified the overlap between the two sensor topographies by  
359 the angle between their respective vector representations (**See Fig 2**). Larger angles indicated  
360 more separation and less topological overlap between sensor groups. The topographical  
361 separation between the sensor-wide distribution of alpha and beta power was found to increase  
362 with age ( $\beta=0.003, p < 0.0001$ ) (**Fig 2A**). **Fig 2B** shows the average topographical map of alpha  
363 activity at the center alpha frequency and average beta activity in 16-25 Hz for the youngest and  
364 oldest age groups.

365  
366 Although we observed similar patterns of difference between the oldest and youngest age groups  
367 for global alpha band power and beta band power, there seemed to be a qualitative difference in  
368 the overlap of sensors representing alpha and beta band activity. The categorical analysis  
369 revealed that sample means in YA group differed from ME, ML and OA. ME differed from ML and  
370 OA whereas ML was different from OA (effect sizes reported in Supplementary Material).

371

372 **Age trajectories in band-specific global network measures: coherence and metastability**

373

374 **Global Coherence over lifespan**

375

376 Presence of large-scale functional brain networks was investigated using global coherence across  
377 all MEG sensors at different frequencies for each subject (Cimenser et al,2011; Kumar et al.  
378 2016). Whole-brain coherence was summarized as the ratio of the principal eigenvalue to the sum  
379 of all eigenvalues of the inter-sensor coherence matrix (see Materials and methods).

380

381 Global coherence at all the frequency values within a frequency band were averaged to generate  
382 a representative value for the corresponding frequency band in four age groups, YA, ME, ML, OA  
383 (**Fig 3A**). Representative global coherence in age bin was averaged for the continuous analysis  
384 and standard error was computed for each age bin (**Fig 3B**). Global Coherence in the delta and  
385 theta band was found to increase with age – delta ( $\beta=0.0005, p < 0.0001$ ), theta ( $\beta=0.0002, p =$   
386  $0.009$ ). In contrast, global coherence in the alpha band varied inversely with age ( $\beta=-0.0008, p <$   
387  $0.001$ ) while Beta band global coherence did not display an age effect ( $\beta\sim 0, p = 0.86$ ) (See **Fig**  
388 **3B**).

389

390 **Metastability and aging**

391

392 We estimated the variability of neuronal communication states using metastability as a function  
393 of age and frequency. We observed a dichotomous pattern in metastability as a function of  
394 frequencies in all age groups - a sharp decrease with increasing frequencies till 12 Hz and a  
395 gradual increase in the metastability indices across frequencies between 12 – 40 Hz (**Fig 3C**).  
396 Qualitatively, we found metastability to be higher for delta, theta and beta bands as compared to  
397 the alpha band. Interestingly, in all age categories, the variation of metastability with frequencies  
398 was consistent, essentially a U-shaped profile. From the continuous analysis we could establish  
399 that band-specific metastability increased with age across all frequency bands- Delta  
400 ( $\beta=0.0004, p < 0.0001$ ), Theta ( $\beta=0.0004, p < 0.0001$ ), Alpha ( $\beta=0.0003, p < 0.0001$ ), Beta  
401 ( $\beta=0.0001, p < 0.0001$ ).

402

403 **Region-wise analysis of metastability reveals differential trends**

404

405 In order to track changes in metastability in specific brain areas we segmented the sensors in 5

406 groups - Frontal, Centro-Parietal, Occipital, Left Temporal and Right Temporal regions. The  
407 region-wise analysis consisted of 14 randomly sampled sensors to compute metastability in each  
408 brain region. Next, we tracked the region-wise metastability with aging. Spearman rank correlation  
409 was performed to characterize trends in band and region specific metastability and effect sizes  
410 quantified using Cohen's  $d$ . Delta and Theta oscillations either stayed invariant or reduced as a  
411 function of age in the occipital, left temporal and right temporal regions. Beta band metastability  
412 showed the highest age correlation (using Spearman rank test) in the centro-parietal sensors  
413 while staying invariant in the occipital and temporal sensors. The following Spearman rank  
414 coefficients and effect sizes (Cohen's  $d$ ) were obtained for delta band - frontal ( $c = 0.2499, d =$   
415  $0.249, p < 0.001$ ), centro-parietal ( $c = 0.1629, d = 0.3302, p < 0.001$ ), occipital ( $c = -0.0686, d =$   
416  $-0.13, p = 0.0805$ ), left temporal ( $c \sim 0, p = 0.92$ ), right temporal ( $c = -0.1428, d = -0.28, p <$   
417  $0.001$ ). The corresponding values for alpha band were frontal ( $c = 0.2161, d = 0.44, p < 0.001$ ),  
418 centro-parietal ( $c = 0.1808, d = 0.36, p < 0.001$ ), occipital ( $c = 0.1348, d = 0.27, p < 0.001$ ), left  
419 temporal ( $c = 0.2030, d = 0.414, p < 0.001$ ), right temporal ( $c = 0.2070, d = 0.42, p < 0.001$ ). For  
420 theta band- frontal ( $c = 0.1725, d = 0.35, p < 0.001$ ), centro-parietal ( $c = 0.2049, d = 0.416, p <$   
421  $0.001$ ), occipital ( $c = 0.1141, d = -0.2, p < 0.001$ ), left-temporal ( $c = -0.04, d = -0.08, p <$   
422  $0.2396$ ), right-temporal ( $c = 0.0457, d = -0.08, p < 0.2443$ ) were obtained. We tracked  
423 metastability in the beta band for two frequency bands ( $\beta_1, \beta_2$ ) using similar statistical  
424 methodology. Centro-parietal sensors showed the highest age- related positive correlations ( $c =$   
425  $0.2046, 0.2542, d = 0.418, 0.51, p < 0.001$  for the two bands respectively) (Fig 4).

426

#### 427 **Relationship of between global network measures and performance metrics over lifespan**

428

429 In order to evaluate the relationship of normative brain rhythms over lifespan we computed the  
430 correlations between global network measures and the performance metric of precision in a visual  
431 short-term working memory (VSTM, previous used by Zhang et al 2008) task available with the  
432 Cam-CAN cohort. We observed a significant correlation at 95% confidence levels between global  
433 coherence in the alpha band and precision in VSTM task after regressing out the effect of age  
434 ( $\rho = 0.09, p = 0.0143$ , **Fig 5**). The global coherences and metastability computed in other  
435 frequency band were not significantly correlated with precision (**detailed statistics reported in**  
436 **Supplementary Materials**).

437



## 438 Discussion

439 Neuronal communication is the backbone of basic human brain functions and supports a myriad  
440 of cognitive functions at various scales of nervous system organization (Mesulam 1990). While  
441 spectral estimates attempt to link neural oscillations with cognition (Henry et al. 2016, see  
442 Pesaran et al. 2018 for a nice review), very few studies are available that provide normative  
443 mapping of neuronal oscillations across healthy lifespan aging. We observed a significant age-  
444 related decline in peak alpha frequency (PAF) at the sensor level as well as increase in broadband  
445 beta power in a healthy cohort consisting of 650 human participants from the CAMCAN repository  
446 (Fig 1). Out of all sensor specific spectral features such as frequency and amplitude of oscillations  
447 in narrowband and broadband, PAF and beta power varied exclusively with age in opposite ways  
448 (Fig 1). Subsequently we could track the global subspace that sculpts the alpha and beta  
449 topographies, and their corresponding overlap over lifespan. Interestingly the angular separation  
450 between the alpha and beta topographies increase with age indicative of segregation of  
451 underlying generators over lifespan (Fig 2). Integrative mechanisms operational at the macroscale  
452 of whole-brain MEG sensor-space were captured by two complementary mathematical  
453 frameworks – global coherence spectrum that parametrizes the strength of band specific  
454 synchronization in different frequencies over a set of network nodes (MEG sensors for the  
455 purpose of this paper), and metastability that captures the degree of intermittency that exists  
456 between two successive synchronization states (Fig 3). Together, the two measures along with  
457 the spectral estimates quantifies the dynamic repertoire of the state variables. We observed an  
458 emerging dichotomy with aging in pattern of global coherence across slow and fast time scales  
459 (Fig 3A, B). The global alpha coherence decreases over lifespan followed a linear relationship  
460 whereas global beta coherences are unaffected by aging. The global coherences in slower  
461 frequencies - delta and theta on the other hand, are unaffected by aging up to a critical age of  
462 around ~45-50 years (Fig 3B). Thereafter, the global coherence shows an increase with age up  
463 to ~70 years and decrease further upon reaching a peak value. While alpha global coherence  
464 could be fitted best with a linear curve, theta and delta variation over age was non-linear.  
465 Concurrently, metastability exhibited a monotonically increasing relationship over lifespan in all  
466 frequencies (best fitted by a linear curve), with a visible saturation for elderly (~70 years) (Fig 3C,  
467 D). Interestingly, while increase in metastability in alpha band was truly global, increases in  
468 metastability in other bands were region-specific (Fig 4). Furthermore, while global coherence  
469 may be reflective of task performance, metastability, which is essentially a measure of phase  
470 variability was uncorrelated with task performance (Fig 5). In summary, we present a



471 comprehensive account of the temporal properties of neuro-electromagnetic signals over lifespan  
472 aging that can be further interpreted in relation to recent and established findings in the literature  
473 to develop a neurodynamic explanation of several important observations in healthy aging (Fig 1-  
474 5). Furthermore, we argue that our results are extremely helpful for understanding the pathological  
475 aging scenarios (e.g. Alzheimer's and Dementia) beyond the standard model of "accelerated  
476 ageing" (Toepper 2017)

477 The decrease in PAF, prominently observed in our study, has been reported to be a biomarker of  
478 normal and pathological aging process, especially for dementia, mild cognitive impairment, and  
479 Alzheimer's disease (Scally et al., 2018; Dickinson et al., 2018; Osipova et al., 2005; Jeong,  
480 2004). Patients with Alzheimer's disease show a significant decrease in PAF compared to age-  
481 matched control group (Osipova et al., 2005; Jeong, 2004). Parkinson's patients with dementia  
482 have a lower PAF compared to age-matched controls (Soikkeli et al., 1991). Interestingly,  
483 developmental changes in spontaneous electrocortical activity is associated with an increase in  
484 PAF from early to late childhood (Miskovic et al., 2015). While the mechanistic explanation of this  
485 dichotomy still remains elusive, several computational attempts have suggested a link between  
486 the thalamocortical circuitry responsible for alpha rhythmogenesis and age-related morphological  
487 differences in thalamocortical circuits to explain slowing down of PAF. In fact, PAF may carry the  
488 signature of an ending of rapid neurodevelopmental process of human beings, behaviorally  
489 observed as trait developments from adolescence to young adults. Concurrently, cognitive task  
490 relevant EEG/MEG studies have linked PAF with scores on cognitive paradigms such as working  
491 memory (Clark et. al 2004) and visual acuity (Samaha et. al 2015) suggesting a crucial role of  
492 PAF with age associated changes in attention and memory from YA to OA. Consistent with extant  
493 literature, power in the beta band was found to increase with age. Increase in the band-limited  
494 beta power in older population compared to younger population has been reported both in the  
495 context of resting state and sensory-motor tasks (Rossiter et al., 2014; Heinrichs-Graham et. al,  
496 2016), where beta oscillations have been regarded as an index of motor inhibition and volitional  
497 movement (Heinrichs-Graham et. al 2016). Subsequently, we depart from some earlier studies in  
498 key respects. Firstly, we find that band-limited power (spectral feature independent of frequency  
499 in our study) in the delta, theta and alpha bands does not vary with age. Second, the angular  
500 overlap decrease between the alpha and beta bands topographies with age reflects a segregation  
501 of function which can emerge from neuro compensatory functional mechanisms or possibly  
502 structural decline e.g., myelination degradation. Neurodegenerative pathologies like AD and  
503 Parkinson's share many similarities with healthy aging, due to which many have speculated

504 whether neurodegeneration is an accelerated aging process (Toepper 2017). Remarkably, the  
505 two sets of features, PAF and band-limited beta power exhibits different age associated  
506 trajectories. While decline of PAF is best described with a linear model, the band limited beta  
507 power trend is best described by a quadratic curve across age continuum. Thus, our results throw  
508 in the possibility that while PAF decrease observed in pathological scenarios may be a non-  
509 specific marker of disease, other features like beta power increase may be more relevant  
510 candidates to tag preservation of function via neuro compensatory mechanisms.

511 A key contribution of our study is the archival of global network measures over lifespan,  
512 particularly that are relevant for the neural information processing time scales. Few recent studies  
513 using M/EEG have further emphasized that patterns of age-dependent segregation for beta and  
514 gamma mediated networks differed substantially during maturation (Miskovic et al., 2015; Khan  
515 et al., 2018). A recent study by Khan et al., 2018 further reports that beta band mediated networks  
516 become more locally efficient, i.e. tending towards clustering and more connections with adjacent  
517 regions with age, while gamma band mediated networks become more globally efficient, i.e.  
518 tending towards shorter overall path lengths and thus faster communication across larger cortical  
519 distances, with age during maturation. However, how do such large-scale and local  
520 communication organize and orchestrate across different sensors and in different bands during  
521 various stages of healthy adult lifespan remains largely unknown. In our study, we attempt to  
522 quantify the band specific normative values as features during resting state borrowing the concept  
523 from Communication Through Coherence (CTC) hypothesis. CTC operationally defines neuronal  
524 communication as generation of coherent activity across neuronal assemblies. This view holds  
525 that interareal coherence presents windows of excitability where communication channels  
526 between brain regions are maximally utilized (Fries, 2005). Resting state brain activity is said to  
527 reflect the brain's tendency to engage and disengage these channels of communication  
528 spontaneously (Deco et. al, 2011). From a dynamical systems perspective, spontaneous brain  
529 activity must exhibit metastable brain dynamics, whereby the global brain dynamic stays clear of  
530 the two extremes of constant synchronization and desynchronization and instead, periodically  
531 shuttles back and forth between coherent and incoherent regimes. More formally, global  
532 coherence indexes the average phase and amplitude correlation across sensors whereas  
533 metastability measures the variability in phase relationships of sensors across time. The  
534 complimentary, yet related nature of global coherence and metastability offers unique insights  
535 into the mechanistic underpinnings of global brain dynamics. An example of this is a recent  
536 computational study by Vasa et al. which describes how local lesioning in nodes with high

537 eigenvector centrality leads to a simultaneous decrease in global synchrony along with an  
538 increase in metastability (Vasa et al., 2015). For a review of the complementary nature of global  
539 coherence and metastability, see (Hellyer et al. 2015, Vasa et al. 2015, Deco et al. 2017). The  
540 global coherence decreases in alpha band (8-12 Hz) with concomitant increase of metastability  
541 over lifespan indicates the transformative role of alpha over the aging process. This would strongly  
542 suggest that alpha can be a possible mode of neural communication associated with neural  
543 compensation whereas slower frequencies like delta and theta may reflect a critical juncture in  
544 adult lifespan at certain age ranges. Interestingly the critical age ranges from where delta and  
545 theta global coherence start peaking (~45-50) is a critical phase of life in terms of performance  
546 where ability to learn new skill starts diminishing (Janacsek et al. 2012). We argue while alpha  
547 coherence decrease may be associated with neuro compensatory mechanisms, they may not  
548 have a direct bearing on performance for which delta and theta may be more informative. Studies  
549 have demonstrated that theta rhythms are crucial for information processing underlying sequence  
550 learning (Sauseng et al. 2009, Koene and Hasselmo 2009) which is clearly a relevant metric for  
551 skill learning observed by Janaccsek et al. 2012.

552 Our earlier work has proposed that a way to implement the CTC hypothesis, that is, optimal  
553 exploration of the dynamical repertoire inherent in the brain structural connectivity, is by  
554 maximization of metastability (Deco et. al., 2016). Here, we interpret metastability as a measure  
555 of the variability of the states of phase configurations with time. Thus, metastability should  
556 decrease with the introduction of external stimulation and task conditions. In terms of dynamical  
557 systems, resting brain to exhibit maximal metastability, refining and providing evidence in favor of  
558 the synergetic hypothesis of Haken (Corning 1995) (later further explored by Tognoli and Kelso  
559 2014). We observe an age-related increase in global metastability across all frequency bands and  
560 the trend is best fitted by a linear model. This result can be contextualized from two opposing  
561 theories of healthy aging. The method of neuro-compensation argues that age-related changes  
562 in brain dynamics suggest a compensatory mechanism by which function gets restored in  
563 response to structural decline (Naik et al. 2017). In this regard, it is interesting to note that  
564 Alzheimer's disease and traumatic brain injuries (TBI) are associated with a reduction in global  
565 metastability (Córdova-Palomera et al., 2017; Hellyer et al., 2015). Since metastability is a direct  
566 measure of the functional capacity of the brain and has been shown to confer cognitive flexibility  
567 in task-switching, information-processing and logical memory (Hellyer et al. 2015), this would  
568 argue in favor of a compensatory explanation of the global increase in metastability with aging.  
569 However, the neural noise hypothesis of aging would suggest a different interpretation. This

570 theory argues that age-related cognitive decline is best explained as a consequence of an  
571 increase in the noisy baseline activity of the brain (Voytek et al., 2015; Dave et al., 2018).  
572 According to this framework, global phase inconsistencies as we observe here is an obligatory  
573 change resulting from change in underlying scaffold dictated by gradual change in white and grey  
574 matter volume that shifts the baseline and result in an unspecific lifespan-associated increase in  
575 neural noise. Within this framework, changes in global metastability and coherence reflect an  
576 epiphenomenon that occurs due to an increase in neural noise. Future efforts should focus on  
577 resolving this debate. One possible direction would be to study brain signals through measures  
578 of signal complexity using source reconstructed EEG/MEG, to elucidate the role of specific brain  
579 regions in bringing about metastable patterns of activity. More direct estimates of metastable state  
580 switching from electrophysiological data could be employed to disentangle the effects of noise.  
581 Recent works in this direction have proposed ways to directly estimate metastable switching  
582 between synchrony states. For example, Vidaurre et.al. 2016 propose a Hidden Markov Model  
583 (HMM) based method to decompose electrophysiological time series into recurrent, quasi-  
584 stationary phase-locked regimes. This involves fitting source reconstructed time series with  
585 multivariate autoregressive models and modelling state switches through the HMM approach.  
586 Another promising avenue would be to invoke whole brain computational models which  
587 incorporate neural plasticity mechanisms that operate at time scales that are relevant to aging  
588 (Vattikonda et al., 2016; Abeysuriya et al., 2018). This is also necessary to reconcile the region  
589 specific metastability patterns we observe across frequency bands, with alpha band metastability  
590 increase being truly global versus region-specific enhancement and decrease of metastability in  
591 other frequency bands over lifespan (Fig 4).

592 An ongoing research direction in the neuroimaging community is to relate resting state dynamics  
593 to performance measures also sometimes referred to as behavioral phenotypes (Nomi et al 2017,  
594 Liegeois et. al 2019). While the slow time-scale of fMRI has been primarily used for this purpose  
595 to argue about cognitive flexibility from resting state functional connectivity (FC) metrics (Naik et  
596 al 2017, Nomi et al 2017, Liegos et al 2019), the variation of the global coherence and  
597 metastability from MEG presented us an opportunity to investigate the relationships between  
598 global network properties and task performance in the neural times-scale. The CAM-CAN dataset  
599 has the Verbal short-term memory task (VSTM) in which the accuracy is anti-correlated linearly  
600 with increase in age. Interestingly only the global coherence in alpha band was correlated with  
601 precision when the age effects were corrected, while the global coherence in other frequency  
602 bands are uncorrelated with VSTM performance (Fig 5). On the other hand, metastability has no

603 bearing on performance accuracy once the effects of ageing were considered for any frequency.  
604 Thus, except the global network captured by alpha global coherence, the others are non-specific  
605 measures of neurophysiological processing. In other words, measures like global coherence/  
606 metastability quantifies the overall shift global information processing rather than being relevant  
607 for a specific task.

608 An important caveat of our study was due to limitation posed by the Cam-CAN data set particularly  
609 because of the presence of harmonics of lower frequencies being present in higher frequencies,  
610 a systematic analysis of gamma band was not possible. The gamma frequencies in the resting  
611 state did not show any statistically significant differential change with ageing at least in the low  
612 gamma range (30-40 Hz), although the task data showed interesting patterns. However, such  
613 discussions remain out of scope of this paper. Another limitation is that in spite of large sample  
614 size the current analysis is restricted to the sensor level, our results are so far only indicative of  
615 activity at the neural level. Source reconstruction may provide a direct estimate of global  
616 coherence at the level of neural assemblies and help in elucidating its relationship with sensor  
617 level global coherence and metastability, the efforts toward which will be presented elsewhere in  
618 future. Caution is also required in interpreting the results due to the modest effect sizes involved  
619 in certain measures. Similarly, caution is warranted in interpreting global coherence and  
620 metastability measures. Due to the way it is constructed, global coherence may give misleading  
621 information under some circumstances. For example, it is possible to obtain spuriously high  
622 values of global coherence even when the underlying signals are independent when most of the  
623 power is concentrated in a few sensors. In this study, the almost evenly distributed scalp  
624 topographies (Fig.3) would preclude that possibility. Future work is underway to address some of  
625 these issues and limitations. The other limitation of the present study is the use of simple statistical  
626 models to explain spectral features as a function of age, but more complicated component models  
627 can be used in future (e.g., in Liegeois et al. 2019). A multidimensional analysis by estimating FC  
628 dynamics corresponding to different performance measures using big data techniques can further  
629 shape the understanding of rest and task

630

631

## 632 Disclosure Statement

633 The authors declare no conflicts of interest.

## 634 Acknowledgements

635  
636 This study was supported by NBRC Core funds, Ramalingaswami Fellowships (Department of  
637 Biotechnology, Government of India) to DR (BT/RLF/Re-entry/07/2014) and AB (BT/RLF/Re-  
638 entry/31/2011) and Innovative Young Biotechnologist Award (IYBA) to AB (BT/07/IYBA/2013). AB  
639 also acknowledges the support of the Centre of Excellence in Epilepsy and MEG. DR was also  
640 supported by SR/CSRI/21/2016 extramural grant from the Department of Science and  
641 Technology (DST) Ministry of Science and Technology, Government of India. Data collection and  
642 sharing for this project was provided by the Cambridge Centre for Ageing and Neuroscience  
643 (CamCAN). CamCAN funding was provided by the UK Biotechnology and Biological Sciences  
644 Research Council (grant number BB/H008217/1), together with support from the UK Medical  
645 Research Council and University of Cambridge, UK. In accordance with the data usage  
646 agreement for CAMCAN dataset, the article has been submitted as open-access.

## 647 References

- 648  
649 Abeysuriya, R. G., Hadida, J., Sotiropoulos, S. N., Jbabdi, S., Becker, R., Hunt, B. A., ... &  
650 Woolrich, M. W. (2018). A biophysical model of dynamic balancing of excitation and inhibition in  
651 fast oscillatory large-scale networks. *PLoS computational biology*, *14*(2), e1006007.
- 652  
653 Benjamini, Y., Hochberg, Y. (1995). Controlling the false discovery rate: A practical and powerful  
654 approach to multiple testing. *J. R. Stat. Soc. Series B Stat. Methodol.* *57*, 289-300.
- 655  
656 Bishop, N. A., Lu, T., & Yankner, B. A. (2010). Neural mechanisms of ageing and cognitive  
657 decline. *Nature*, *464*(7288), 529.
- 658  
659 Bokil, H., Andrews, P., Kulkarni, J. E., Mehta, S., & Mitra, P. P. (2010). Chronux: a platform for  
660 analyzing neural signals. *Journal of neuroscience methods*, *192*(1), 146-151.
- 661  
662 Bressler, S. L., & Kelso, J. S. (2001). Cortical coordination dynamics and cognition. *Trends in*



663 cognitive sciences, 5(1), 26-36.

664

665 Buzsaki, G.(2011) Rhythms of the brain. Oxford University Press

666

667 Cimenser,A.,Purdon,P.L.,Pierce,E.T.,Walsh,J.L.,Salazar-Gomez,A.F.,

668 Dave, S., Brothers, T. A., & Swaab, T. Y. (2018). 1/f neural noise and electrophysiological indices  
669 of contextual prediction in aging. *Brain research*, 1691, 34-43.

670

671 Clark, C. R., Veltmeyer, M. D., Hamilton, R. J., Simms, E., Paul, R., Hermens, D., & Gordon, E.  
672 (2004). Spontaneous alpha peak frequency predicts working memory performance across the  
673 age span. *International Journal of Psychophysiology*, 53(1), 1-9.

674

675 Córdova-Palomera, A., Kaufmann, T., Persson, K., Alnæs, D., Doan, N. T., Moberget, T., &  
676 Engedal, K. (2017). Disrupted global metastability and static and dynamic brain connectivity  
677 across individuals in the Alzheimer’s disease continuum. *Scientific reports*, 7, 40268.

678

679 Corning, P. A. (1995). Synergy and self-organization in the evolution of complex systems.  
680 *Systems Research*, 12(2), 89-121.

681

682 Davis, S. W., Dennis, N. A., Daselaar, S. M., Fleck, M. S., Cabeza, R. (2008). Que PASA? The  
683 posterior-anterior shift in aging. *Cereb. Cortex*. 18, 1201–1209.

684

685 Davis, S. W., Dennis, N. A., Buchler, N. G., White, L. E., Madden, D. J., & Cabeza, R. (2009).  
686 Assessing the effects of age on long white matter tracts using diffusion tensor tractography.  
687 *Neuroimage*, 46(2), 530-541.

688

689 Deco, G., Jirsa, V.K., McIntosh, A.R. (2011). Emerging concepts for the dynamical organization  
690 of resting-state activity in the brain. *Nat. Rev. Neurosci.* 12, 43-56.

691

692 Deco, G., & Kringelbach, M. L. (2016). Metastability and coherence: extending the communication  
693 through coherence hypothesis using a whole-brain computational perspective. *Trends in*  
694 *neurosciences*, 39(3), 125-135.

695

696 Deco, G., Cabral, J., Woolrich, M. W., Stevner, A. B., Van Hartevelt, T. J., & Kringelbach, M. L.

- 697 (2017). Single or multiple frequency generators in on-going brain activity: A mechanistic whole-  
698 brain model of empirical MEG data. *Neuroimage*, 152, 538-550.
- 699
- 700 Dickinson, A., DiStefano, C., Senturk, D., & Jeste, S. S. (2018). Peak alpha frequency is a neural  
701 marker of cognitive function across the autism spectrum. *European Journal of Neuroscience*,  
702 47(6), 643-651.
- 703
- 704 Duffy, F.H., Albert, M.S., McAnulty, G., Garvey, AJ. (1984). Age-related differences in brain  
705 electrical activity of healthy subjects. *Ann. Neurol.* 16, 430-438.
- 706
- 707 Foster, J. J., Sutterer, D. W., Serences, J. T., Vogel, E. K., & Awh, E. (2015). The topography of  
708 alpha-band activity tracks the content of spatial working memory. *Journal of neurophysiology*,  
709 115(1), 168-177.
- 710
- 711 Fotenos, A.F., Snyder, A.Z., Girton, L.E., Morris, J.C., Buckner, R.L. (2005). Normative estimates  
712 of cross-sectional and longitudinal brain volume decline in aging and AD. *Neurology*. 64, 1032-  
713 1039.
- 714
- 715 Fries, P. (2005). A mechanism for cognitive dynamics: neuronal communication through neuronal  
716 coherence. *Trends Cogn. Sci.* 9, 474-480.
- 717
- 718 Hall, S.D., Stanford, I.M., Yamawaki, N., McAllister, C.J., Rönqvist, K.C., Woodhall, G.L.,  
719 Furlong, P.L. (2011). The role of GABAergic modulation in motor function related neuronal  
720 network activity.
- 721
- 722 Hanslmayr, S., Aslan, A., Staudigl, T., Klimesch, W., Herrmann, C.S., Bäuml, K.H. (2007).  
723 Prestimulus oscillations predict visual perception performance between and within subjects.  
724 *Neuroimage*. 37, 1465-1473.
- 725 Harrell, P.G., et. al. (2011). Tracking brain states under general anesthesia by Using global  
726 coherence analysis. *Proc. Natl. Acad. Sci. U.S.A.* 108, 8832–8837.  
727 doi:10.1073/pnas
- 728
- 729 Heinrichs-Graham, E., McDermott, T. J., Mills, M. S., Wiesman, A. I., Wang, Y. P., Stephen, J.  
730 M., ... & Wilson, T. W. (2018). The lifespan trajectory of neural oscillatory activity in the motor



731 system. *Developmental cognitive neuroscience*, 30, 159-168.

732

733 Hellyer, P. J., Scott, G., Shanahan, M., Sharp, D. J., & Leech, R. (2015). Cognitive flexibility  
734 through metastable neural dynamics is disrupted by damage to the structural connectome.  
735 *Journal of Neuroscience*, 35(24), 9050-9063.

736

737 Ishii, R., Canuet, L., Aoki, Y., Hata, M., Iwase, M., Ikeda, S., ... & Ikeda, M. (2017). Healthy and  
738 Pathological Brain Aging: From the Perspective of Oscillations, Functional Connectivity, and  
739 Signal Complexity. *Neuropsychobiology*, 75(4), 151-161.

740

741 Janacsek, Karolina, József Fiser, and Dezsó Nemeth. "The best time to acquire new skills: Age-  
742 related differences in implicit sequence learning across the human lifespan." *Developmental*  
743 *science* 15, no. 4 (2012): 496-505.

744

745 JF Hipp, DJ Hawellek, M Corbetta, M Siegel, AK Engel (2012) Large-scale cortical correlation  
746 structure of spontaneous oscillatory activity. *Nature Neuroscience* volume 15, pages 884–890.

747

748 Jeong, J. (2004). EEG dynamics in patients with Alzheimer's disease. *Clin. Neurophysiol.* 115,  
749 1490-1505.

750

751 Kempermann, G., Kuhn, H.G., Gage, F.H. (1997). More hippocampal neurons in adult mice living  
752 in an enriched environment. *Nature*. 386, 493-505.

753

754 Koenig, T., Prichep, L., Lehmann, D., Sosa, P.V., Braeker, E., Kleinlogel, H., Isenhardt, R., John,  
755 E.R. (2002). Millisecond by millisecond, year by year: normative EEG microstates and  
756 developmental stages. *Neuroimage*. 16, 41-48.

757

758 Kringelbach, M. L., McIntosh, A. R., Ritter, P., Jirsa, V. K., & Deco, G. (2015). The rediscovery of  
759 slowness: exploring the timing of cognition. *Trends in cognitive sciences*, 19(10), 616-628.

760

761 Kumar, G. V., Halder, T., Jaiswal, A. K., Mukherjee, A., Roy, D. and Banerjee, A. (2016). Large  
762 scale functional brain networks underlying temporal integration of audio–visual speech  
763 perception: An EEG study, *Front. Psychol.* 7, 1558. DOI:10.3389/fpsyg.2016.01558.

764

765 Loerch, P. M., Lu, T., Dakin, K. A., Vann, J. M., Isaacs, A., Geula, C., ... & Prolla, T. A. (2008).  
766 Evolution of the aging brain transcriptome and synaptic regulation. *PloS one*, 3(10), e3329.  
767

768 Maurits, N.M., Scheeringa, R., van der Hoeven, J.H., de Jong, R. (2006). EEG coherence  
769 obtained from an auditory oddball task increases with age. *J. Clin. Neurophysiol.* 23, 395-403.  
770

771 Muthukumaraswamy, S.D., Myers, J.F., Wilson, S.J., Nutt, D.J., Lingford-Hughes, A., Singh, K.D.,  
772 Hamandi, K. (2013). The effects of elevated endogenous GABA levels on movement-related  
773 network oscillations. *Neuroimage*. 66, 36-41.  
774

775 Koene, R. A., and M. E. Hasselmo. "Hippocampus: Computational models." (2009): 1137-1142.  
776

777 Liégeois, Raphaël, Jingwei Li, Ru Kong, Csaba Orban, Dimitri Van De Ville, Tian Ge, Mert R.  
778 Sabuncu, and BT Thomas Yeo. "Resting brain dynamics at different timescales capture distinct  
779 aspects of human behavior." *Nature communications* 10, no. 1 (2019): 1-9.  
780

781 Naik, S., Banerjee, A., Bapi, R.S., Deco, G., Roy, D. (2017). Metastability in Senescence. *Trends*  
782 *Cogn. Sci.* 21, 509-527.  
783

784 Nomi, J. S., Vij, S. G., Dajani, D. R., Steimke, R., Damaraju, E., Rachakonda, S., ... & Uddin, L.  
785 Q. (2017). Chronnectomic patterns and neural flexibility underlie executive function. *Neuroimage*,  
786 147, 861-871.  
787

788 Osipova, D., Ahveninen, J., Jensen, O., Ylikoski, A., Pekkonen, E. (2005). Altered generation of  
789 spontaneous oscillations in Alzheimer's disease. *Neuroimage*. 27, 835-841.  
790

791 Oostenveld, R., Fries, P., Maris, E., & Schoffelen, J. M. (2011). FieldTrip: open source software  
792 for advanced analysis of MEG, EEG, and invasive electrophysiological data. *Computational*  
793 *intelligence and neuroscience*, 2011, 1.  
794

795 Pesaran, B., Vinck, M., Einevoll, G. T., Sirota, A., Fries, P., Siegel, M., Truccolo, W., Schroeder,  
796 C. E., Srinivasan, R. (2018) Investigating Large-Scale Brain Dynamics Using Field Potential  
797 Recordings: Analysis and Interpretation. *Nature Neuroscience*. 21, 903–919.  
798

- 799 Pfefferbaum, A., Sullivan, E. V., Hedehus, M., Lim, K. O., Adalsteinsson, E., & Moseley, M. (2000).  
800 Age-related decline in brain white matter anisotropy measured with spatially corrected echo-  
801 planar diffusion tensor imaging. *Magnetic Resonance in Medicine: An Official Journal of the*  
802 *International Society for Magnetic Resonance in Medicine*, 44(2), 259-268.
- 803
- 804 Pfurtscheller, G., Lopes da Silva, F.H. (1999). Event-related EEG/MEG synchronization and  
805 desynchronization: basic principles. *Clin. Neurophysiol.* 110, 1842-1857.
- 806
- 807 Purdon, P.L., Pavone, K.J., Akeju, O., Smith, A.C., Sampson, A.L., Lee, J., Zhou, D.W., Solt, K.,  
808 Brown, E.N. (2015). The Ageing Brain: Age-dependent changes in the electroencephalogram  
809 during propofol and sevoflurane general anaesthesia. *Br. J. Anaesth.* 115, i46-i57.
- 810
- 811 Rangaswamy, M., Porjesz, B., Chorlian, D. B., Wang, K., Jones, K. A., Bauer, L. O., ... & Begleiter,  
812 H. (2002). Beta power in the EEG of alcoholics. *Biological psychiatry*, 52(8), 831-842.
- 813
- 814 Raz, N., Lindenberger, U., Rodrigue, K. M., Kennedy, K. M., Head, D., Williamson, A., ... & Acker,  
815 J. D. (2005). Regional brain changes in aging healthy adults: general trends, individual differences  
816 and modifiers. *Cerebral cortex*, 15(11), 1676-1689.
- 817
- 818 Reuter-Lorenz, P.A., Jonides, J., Smith, E.E., Hartley, A., Miller, A., Marshuetz, C., Koeppe, R.A.  
819 (2000). Age differences in the frontal lateralization of verbal and spatial working memory revealed  
820 by PET. *J. Cogn. Neurosci.* 12, 174-187.
- 821
- 822 Rossini, P.M., Del Percio, C., Pasqualetti, P., Cassetta, E., Binetti, G., Dal Forno, G., Ferreri, F.,  
823 Frisoni, G., Chiovenda, P., Miniussi, C., Parisi, L., Tombini, M., Vecchio, F., Babiloni, C. (2003).  
824 Conversion from mild cognitive impairment to Alzheimer's disease is predicted by sources and  
825 coherence of brain electroencephalography rhythms. *Neuroscience*. 143, 793-803.
- 826
- 827 Rossiter, H.E., Davis, E.M., Clark, E.V., Boudrias, M.H., Ward, N.S. (2014). Beta oscillations  
828 reflect changes in motor cortex inhibition in healthy ageing. *Neuroimage*. 91, 360-365.
- 829
- 830 Samaha, J., & Postle, B. R. (2015). The speed of alpha-band oscillations predicts the temporal  
831 resolution of visual perception. *Current Biology*, 25(22), 2985-2990.
- 832

- 833 Samaha, J., Sprague, T. C., & Postle, B. R. (2016). Decoding and reconstructing the focus of  
834 spatial attention from the topography of alpha-band oscillations. *Journal of cognitive*  
835 *neuroscience*, 28(8), 1090-1097.
- 836
- 837 Sauseng, Paul, Wolfgang Klimesch, Kirstin F. Heise, Walter R. Gruber, Elisa Holz, Ahmed A.  
838 Karim, Mark Glennon, Christian Gerloff, Niels Birbaumer, and Friedhelm C. Hummel. "Brain  
839 oscillatory substrates of visual short-term memory capacity." *Current biology* 19, no. 21 (2009):  
840 1846-1852.
- 841
- 842 Scally, B., Burke, M. R., Bunce, D., & Delvenne, J. F. (2018). Resting-state EEG power and  
843 connectivity are associated with alpha peak frequency slowing in healthy aging. *Neurobiology of*  
844 *aging*, 71, 149-155.
- 845
- 846 Shafto, M.A., Tyler, L.K., Dixon, M., Taylor, J.R., Rowe, J.B., Cusack, R., Calder, A.J., Marslen-  
847 Wilson, W.D., Duncan, J., Dalgleish, T., Henson, R.N., Brayne, C., CamCAN, & Matthews, F.E.  
848 (2014). The Cambridge Centre for Ageing and Neuroscience (CamCAN) study protocol: a cross-  
849 sectional, lifespan, multidisciplinary examination of healthy cognitive ageing. *BMC Neurology*,  
850 14(204). doi:10.1186/s12883-014-0204-1.
- 851
- 852 Soikkeli, R., Partanen, J., Soininen, H., Pääkkönen, A., Riekkinen, P.Sr. (1991). Slowing of EEG  
853 in Parkinson's disease. *Electroencephalogr. Clin. Neurophysiol.* 79, 159-165.
- 854
- 855 Stam, C.J., van der Made, Y., Pijnenburg, Y.A., Scheltens, P. (2003). EEG synchronization in  
856 mild cognitive impairment and Alzheimer's disease. *Acta. Neurol. Scand.* 108, 90-96.
- 857
- 858 Strunk, J., James, T., Arndt, J., Duarte, A. (2017). Age-related changes in neural oscillations  
859 supporting context memory retrieval. *Cortex.* 91, 40-55.
- 860
- 861 Taulu, S., Simola, J., Kajola, M. (2005). Applications of the signal space separation method. *IEEE*  
862 *Trans. Signal Process.* 53, 3359-3372.
- 863
- 864 Taylor, J.R., Williams, N., Cusack, R., Auer, T., Shafto, M.A., Dixon, M., Tyler, L.K., Cam-CAN,  
865 Henson, R.N. (2017). The Cambridge Centre for Ageing and Neuroscience (Cam-CAN) data  
866 repository: Structural and functional MRI, MEG, and cognitive data from a cross-sectional adult

867 lifespan sample. *NeuroImage*. 144, 262-269.

868

869 Toepper, M. (2017). Dissociating normal aging from Alzheimer's disease: A view from cognitive  
870 neuroscience. *Journal of Alzheimer's Disease*, 57(2), 331-352.

871

872 Tognoli, E., & Kelso, J. S. (2014). The metastable brain. *Neuron*, 81(1), 35-48.

873

874 Uhlhaas, P.J., Singer, W. (2006). Neural Synchrony in Brain Disorders: Relevance for Cognitive  
875 Dysfunctions and Pathophysiology. *Neuron*. 52, 155-168.

876

877 Vidaurre, D., Quinn, A. J., Baker, A. P., Dupret, D., Tejero-Cantero, A., & Woolrich, M. W. (2016).  
878 Spectrally resolved fast transient brain states in electrophysiological data. *Neuroimage*, 126, 81-  
879 95.

880

881 Volf, N.V., Gluhik, A.A. (2011). Background cerebral electrical activity in healthy mental aging.  
882 *Hum. Physiol.* 37, 51-60

883

884 Voytek, B., Kramer, M. A., Case, J., Lepage, K. Q., Tempesta, Z. R., Knight, R. T., & Gazzaley,  
885 A. (2015). Age-related changes in 1/f neural electrophysiological noise. *Journal of Neuroscience*,  
886 35(38), 13257-13265.

887

888 Zhang, W., & Luck, S. J. (2008). Discrete fixed-resolution representations in visual working  
889 memory. *Nature*, 453(7192), 233.

890

## 891 **Table and Figure Legends**

892

893 **Table1.** Sample size and gender statistics in each representative age group

894

895 **Figure 1. Relation between global spectral activity and age. A.** Plots of mean power spectral  
896 density for 4 non-overlapping age groups i.e. 18-35, 36-50, 51-65 and 66-88. Shaded region  
897 denote standard error of mean. **B.** Variation of alpha activity with aging. Center frequency in the  
898 alpha band for each age bin has been plotted as solid circles and solid black line is the linear fit  
899 of these points (labels indicate effect sizes, significance and correlation function) **C.** Spectra in  
900 the delta, theta and alpha bands as a function of age. **D.** Beta spectra as a function of age

901

902 **Figure 2.** Segregation of sensor level topographies with aging. **A.** Angular separation between  
903 alpha and beta bands(in radians) as a function of age. **B.** Boxplot for the distribution of angles  
904 between the sensor topographies of center alpha power and average beta power for the four age  
905 groups. Blue line denotes the median of the distribution and the notch indicates 95% confidence  
906 interval of the median. Inset:Sensor topographies of alpha power at center frequency and average  
907 beta power for the two extreme age groups.

908

909

910 **Figure 3. Differential changes in global coherence with aging. A.** Plots of mean global  
911 coherency for the four age groups. Shaded region denotes s.e.m. **B.** Differential variation of  
912 global coherence for frequency bands. **C.** Metastability for four age groups in delta, theta, alpha  
913 and beta bands.

914

915 **Figure 4: Region-wise increase and decrease in global metastability. A.** Shows the results  
916 for the region-wise metastability analysis. Colors indicate the direction of the age-related trend as  
917 measured by the spearman rank correlation coefficients. 14 sensors were chosen at random from  
918 each of the 5 anatomical areas- frontal, centro-parietal, occipital, left and right temporal. **B.** Vector  
919 View magnetometer layout.

920

921 **Figure 5: Correlation of VSTM precision with global coherence and metastability. Center:**  
922 Scatterplot of precision with age. **Left:** Scatterplot of band-specific global coherence with  
923 precision in VSTM task. **Right:** Scatterplot of band-specific global coherence with precision in  
924 VSTM task.

925

926

927

928

929

930

931

932

| Age group  | N   | % Female |
|------------|-----|----------|
| YA (18-35) | 126 | 55       |
| ME (36-50) | 159 | 49       |
| ML (51-65) | 149 | 50       |
| OA (66-88) | 216 | 46       |

933

934 **Table1.** Sample size and gender in each representative age group

935



Fig 1.

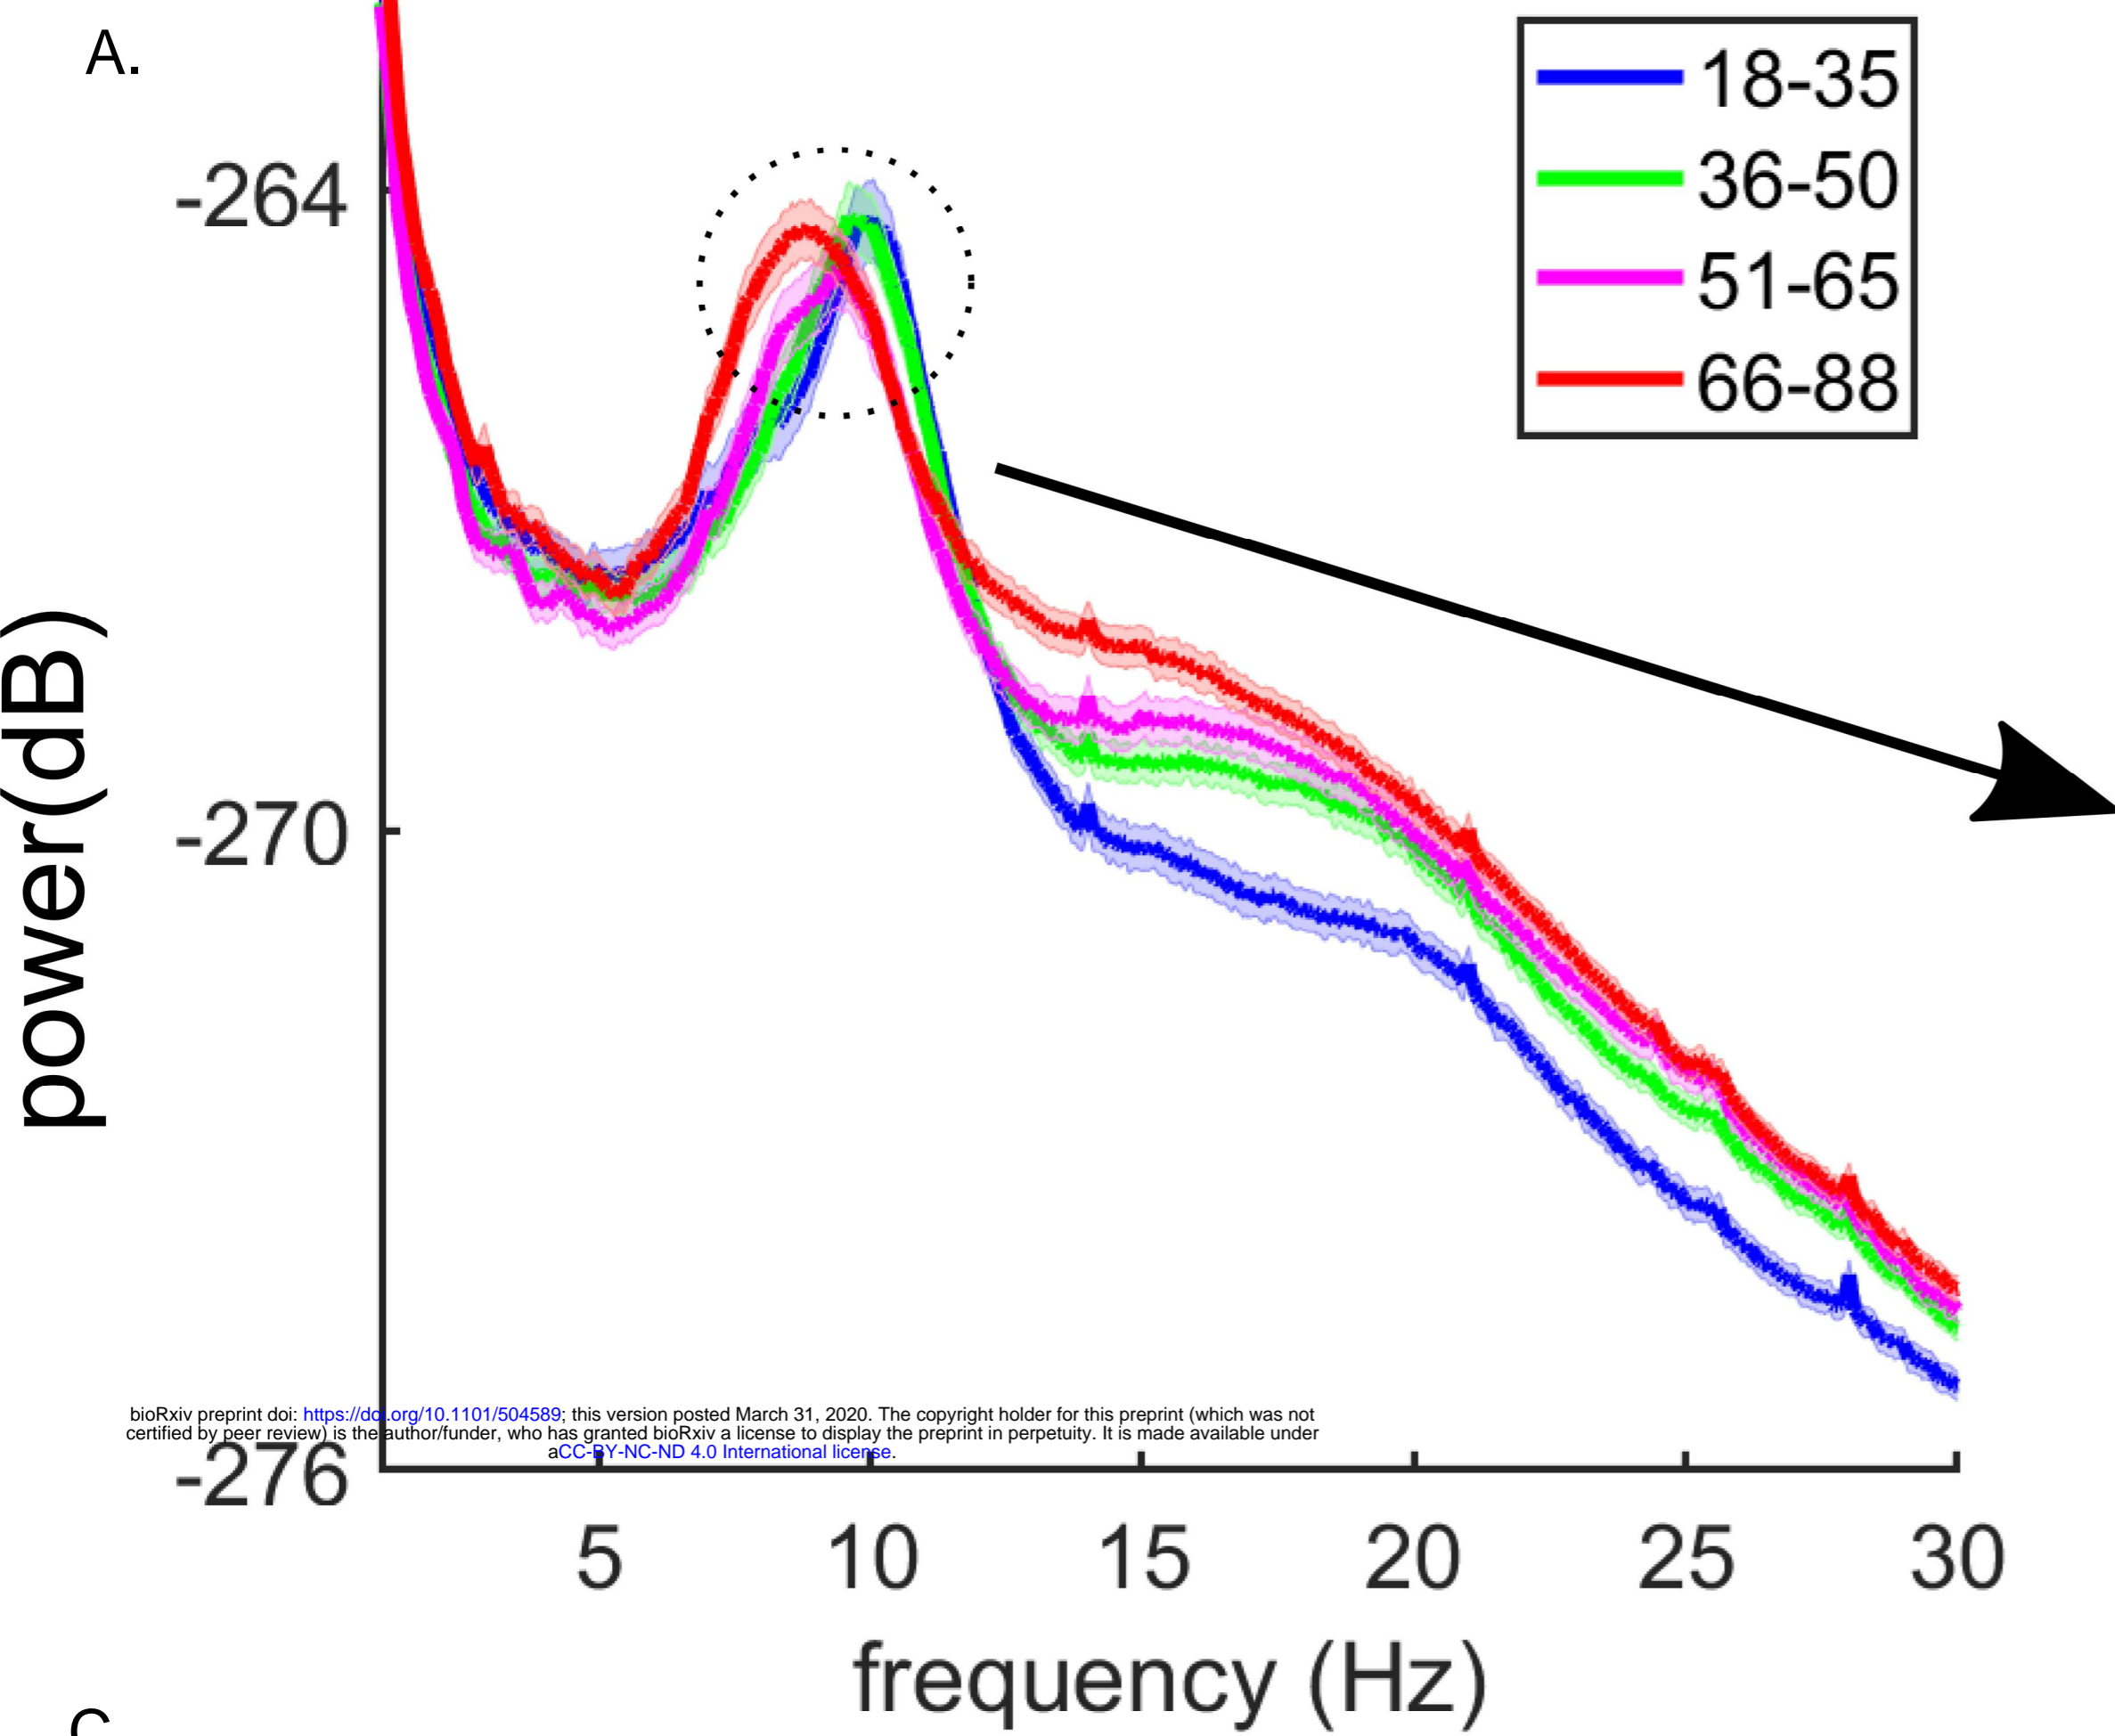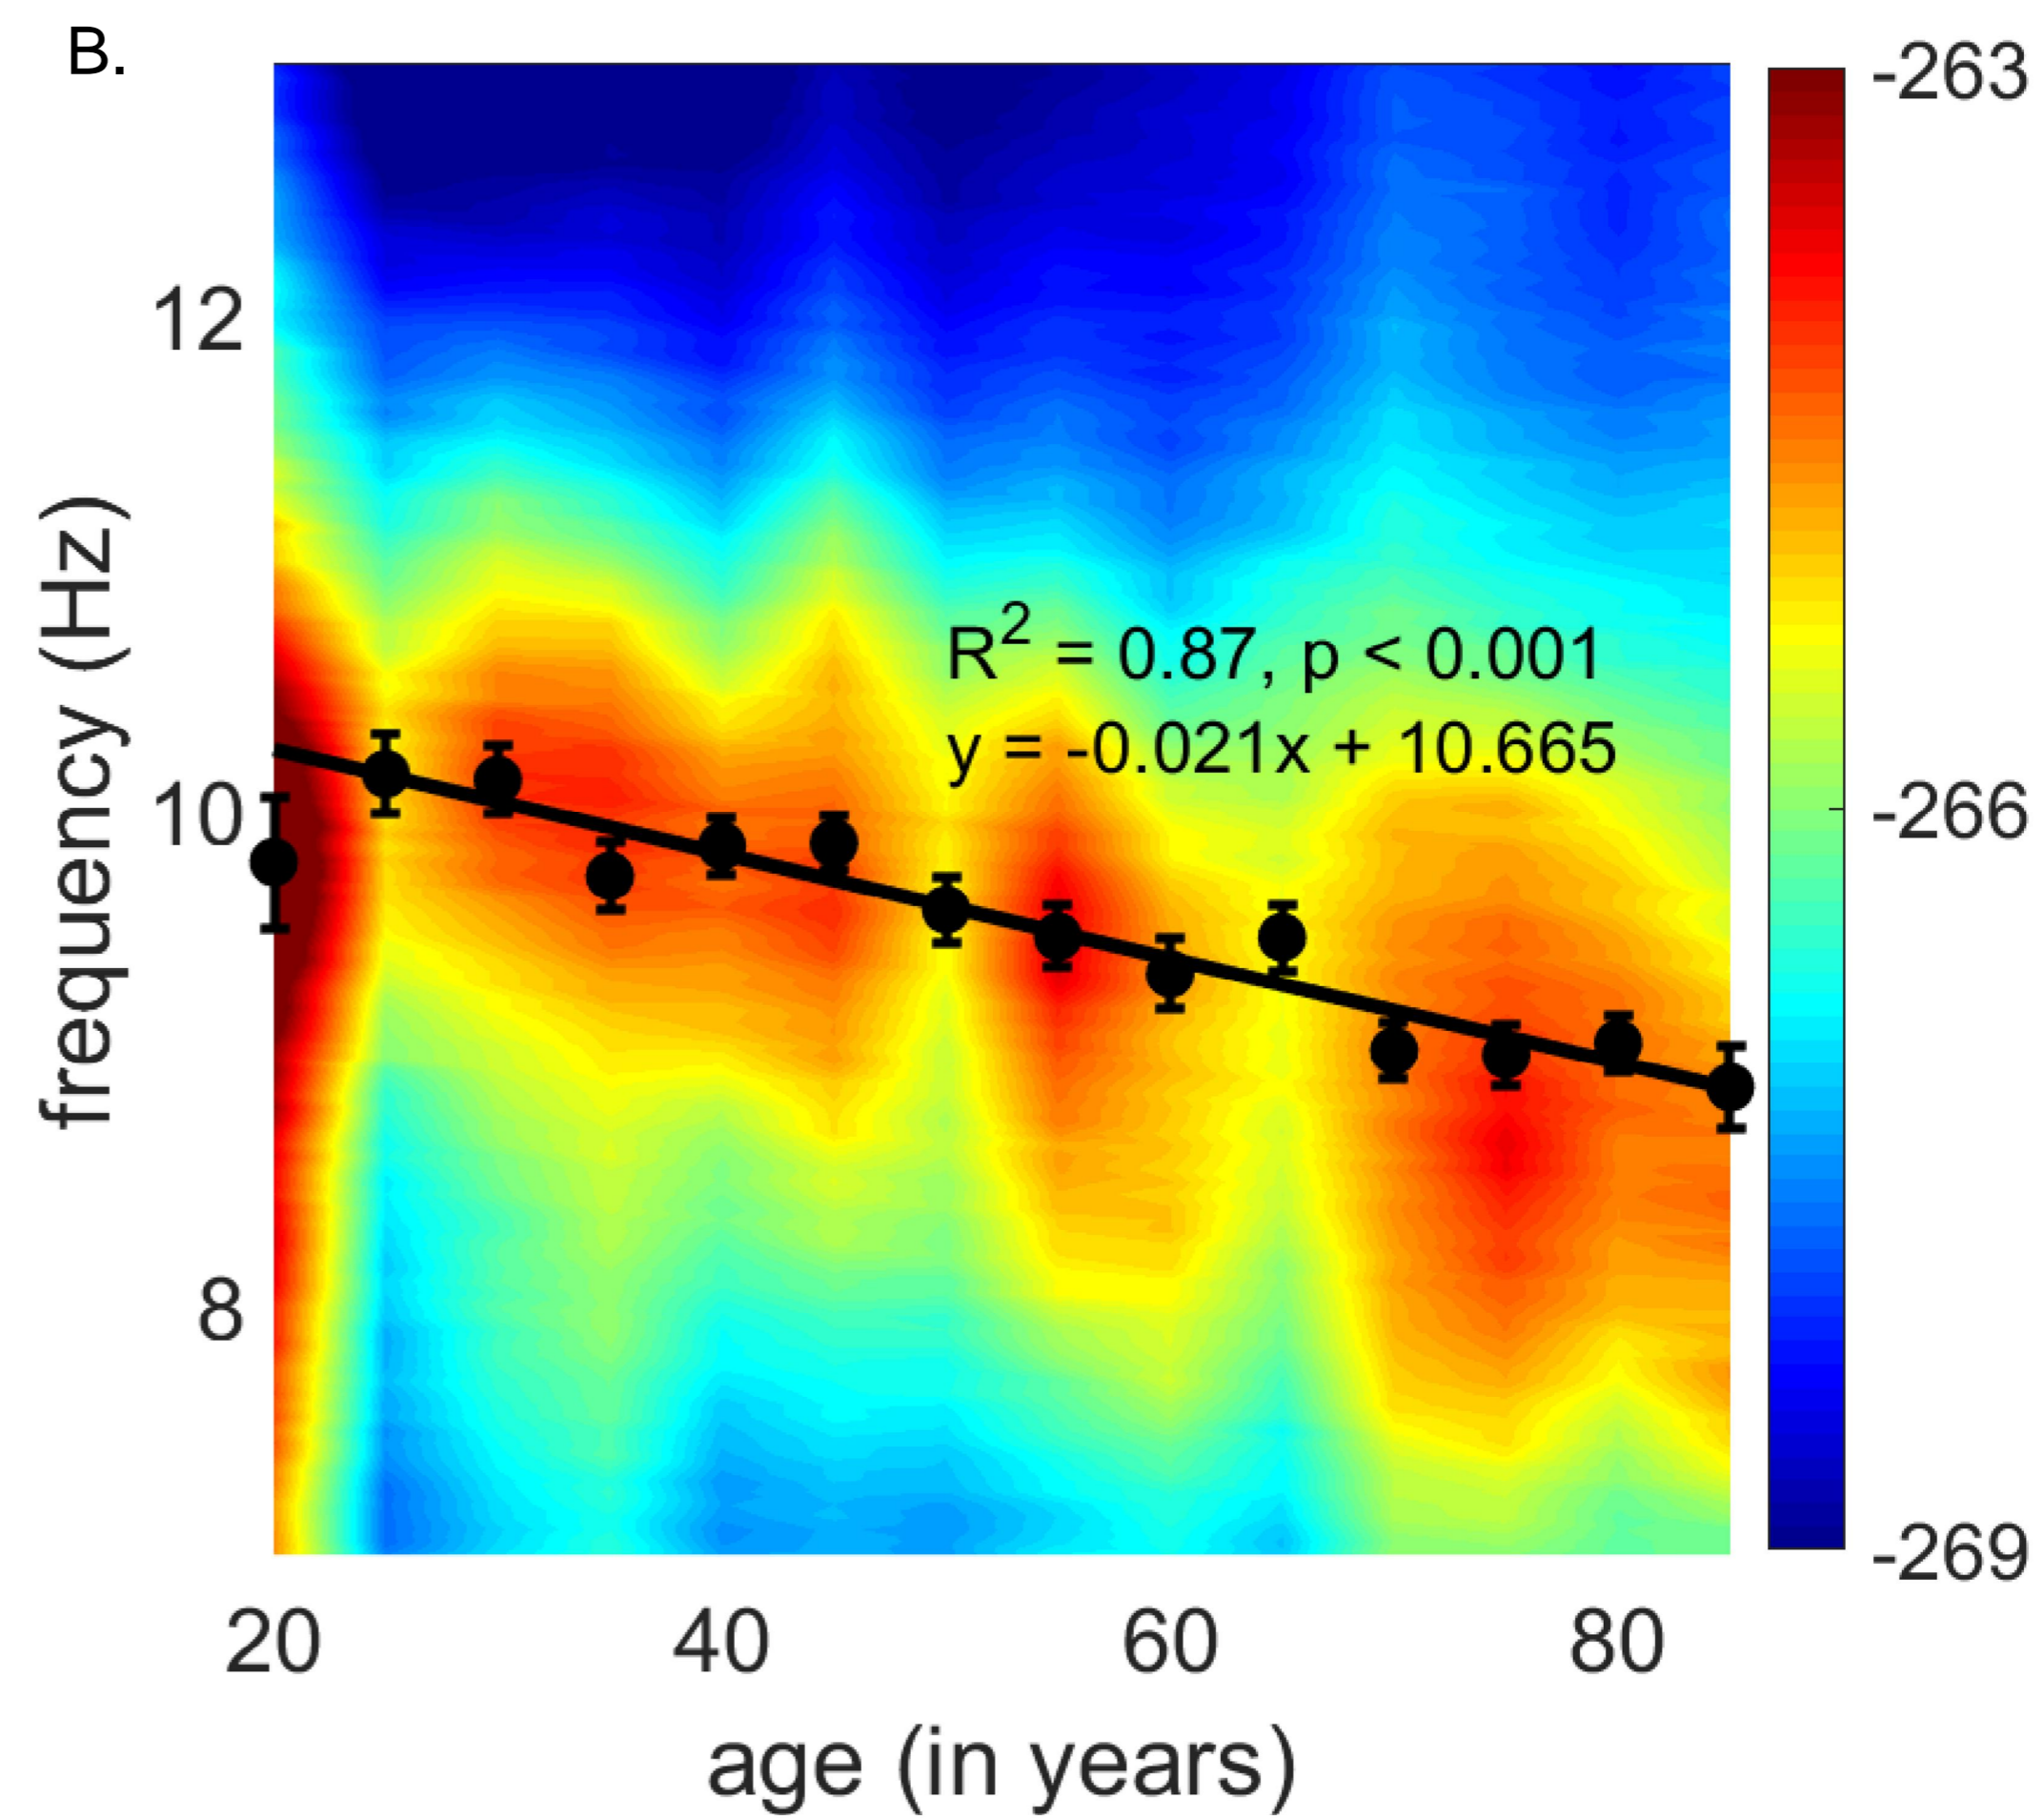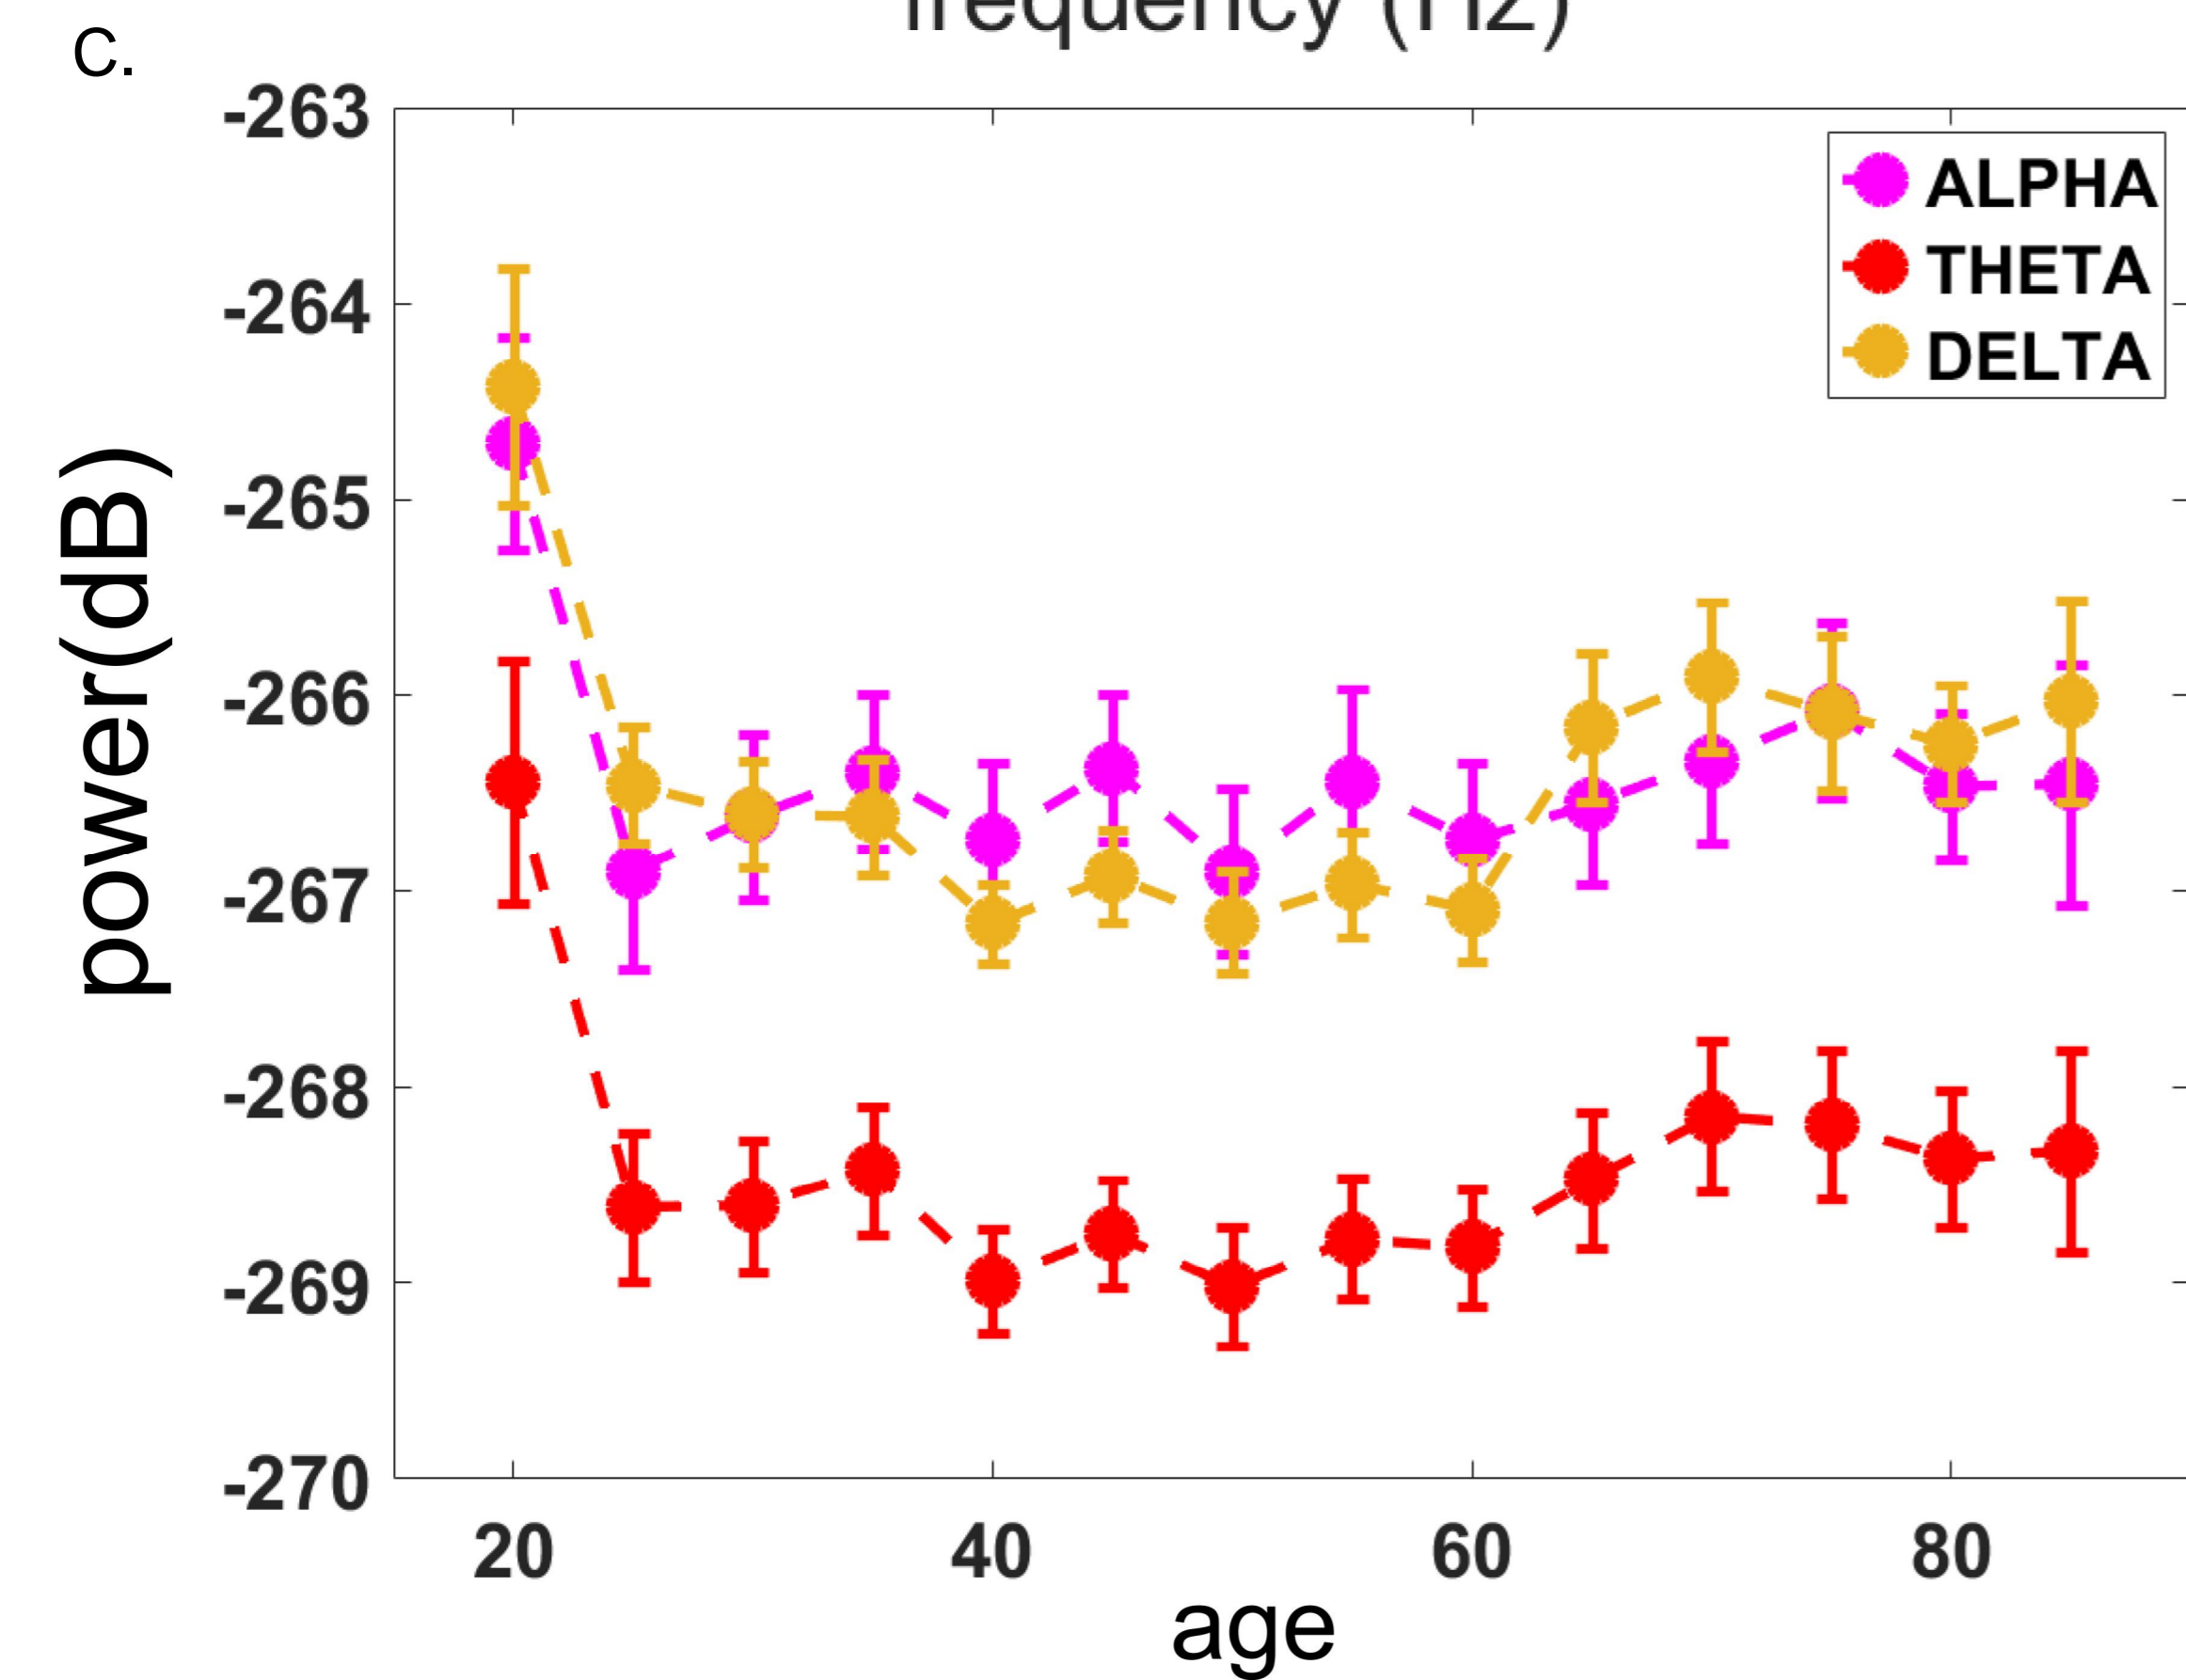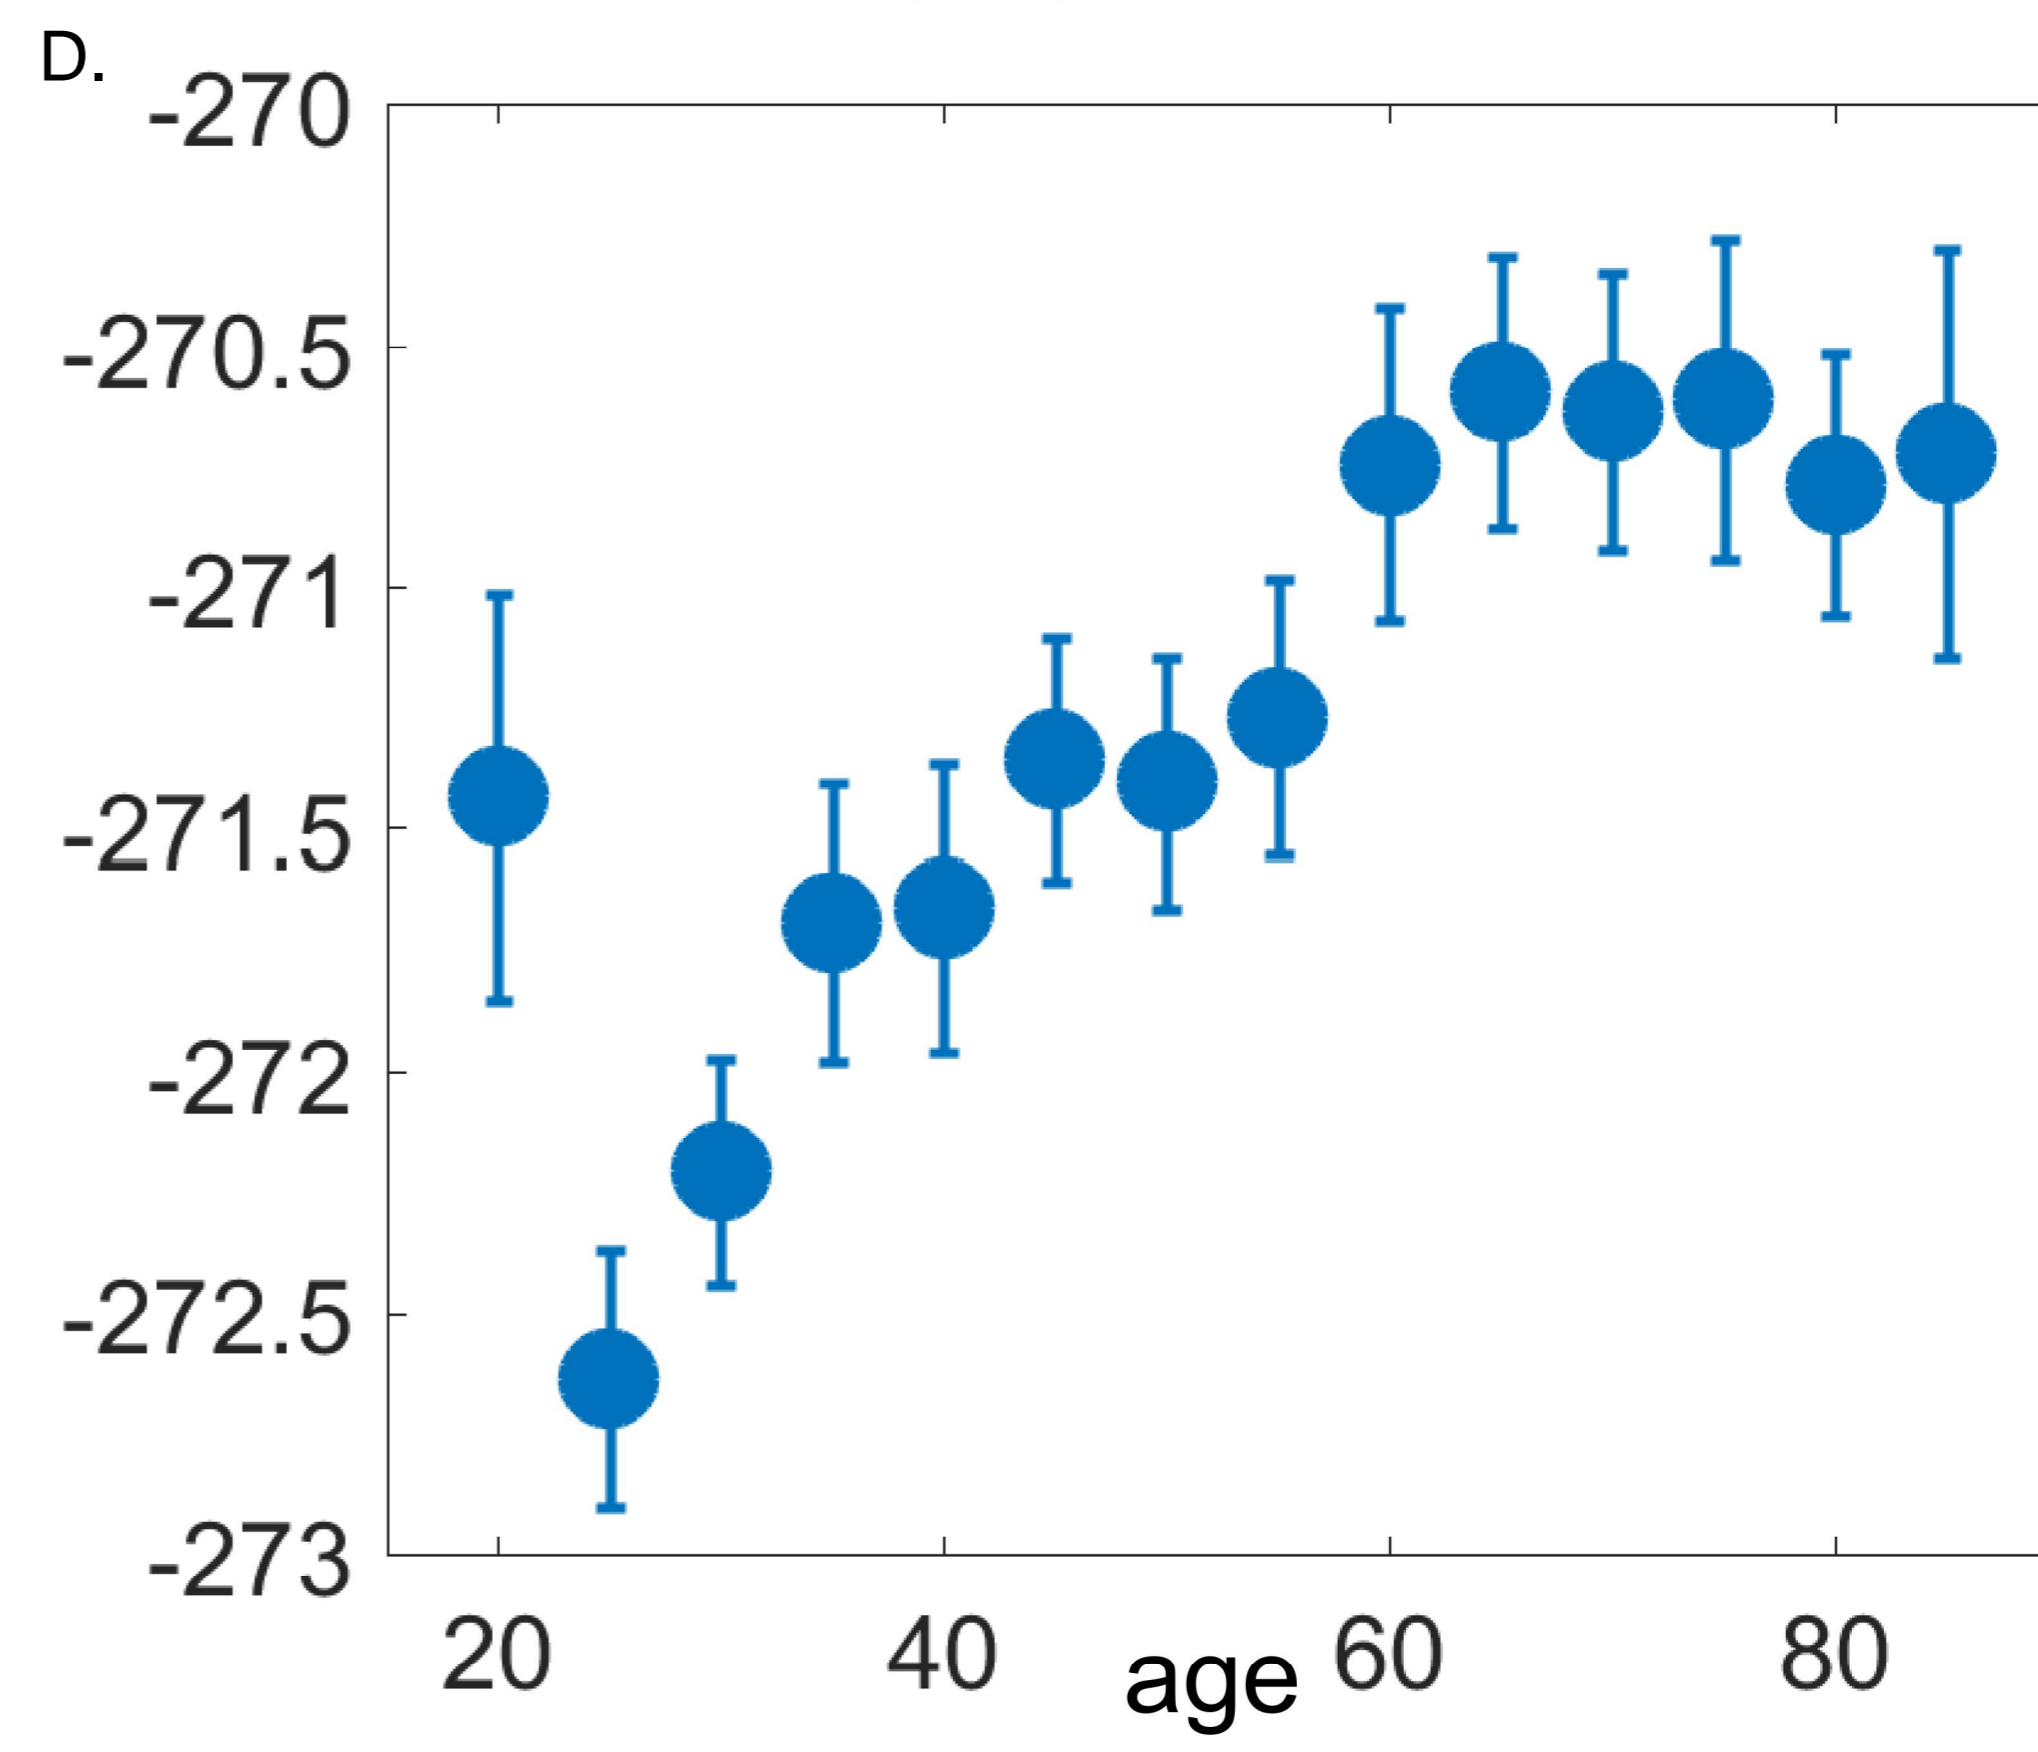



Fig 2.

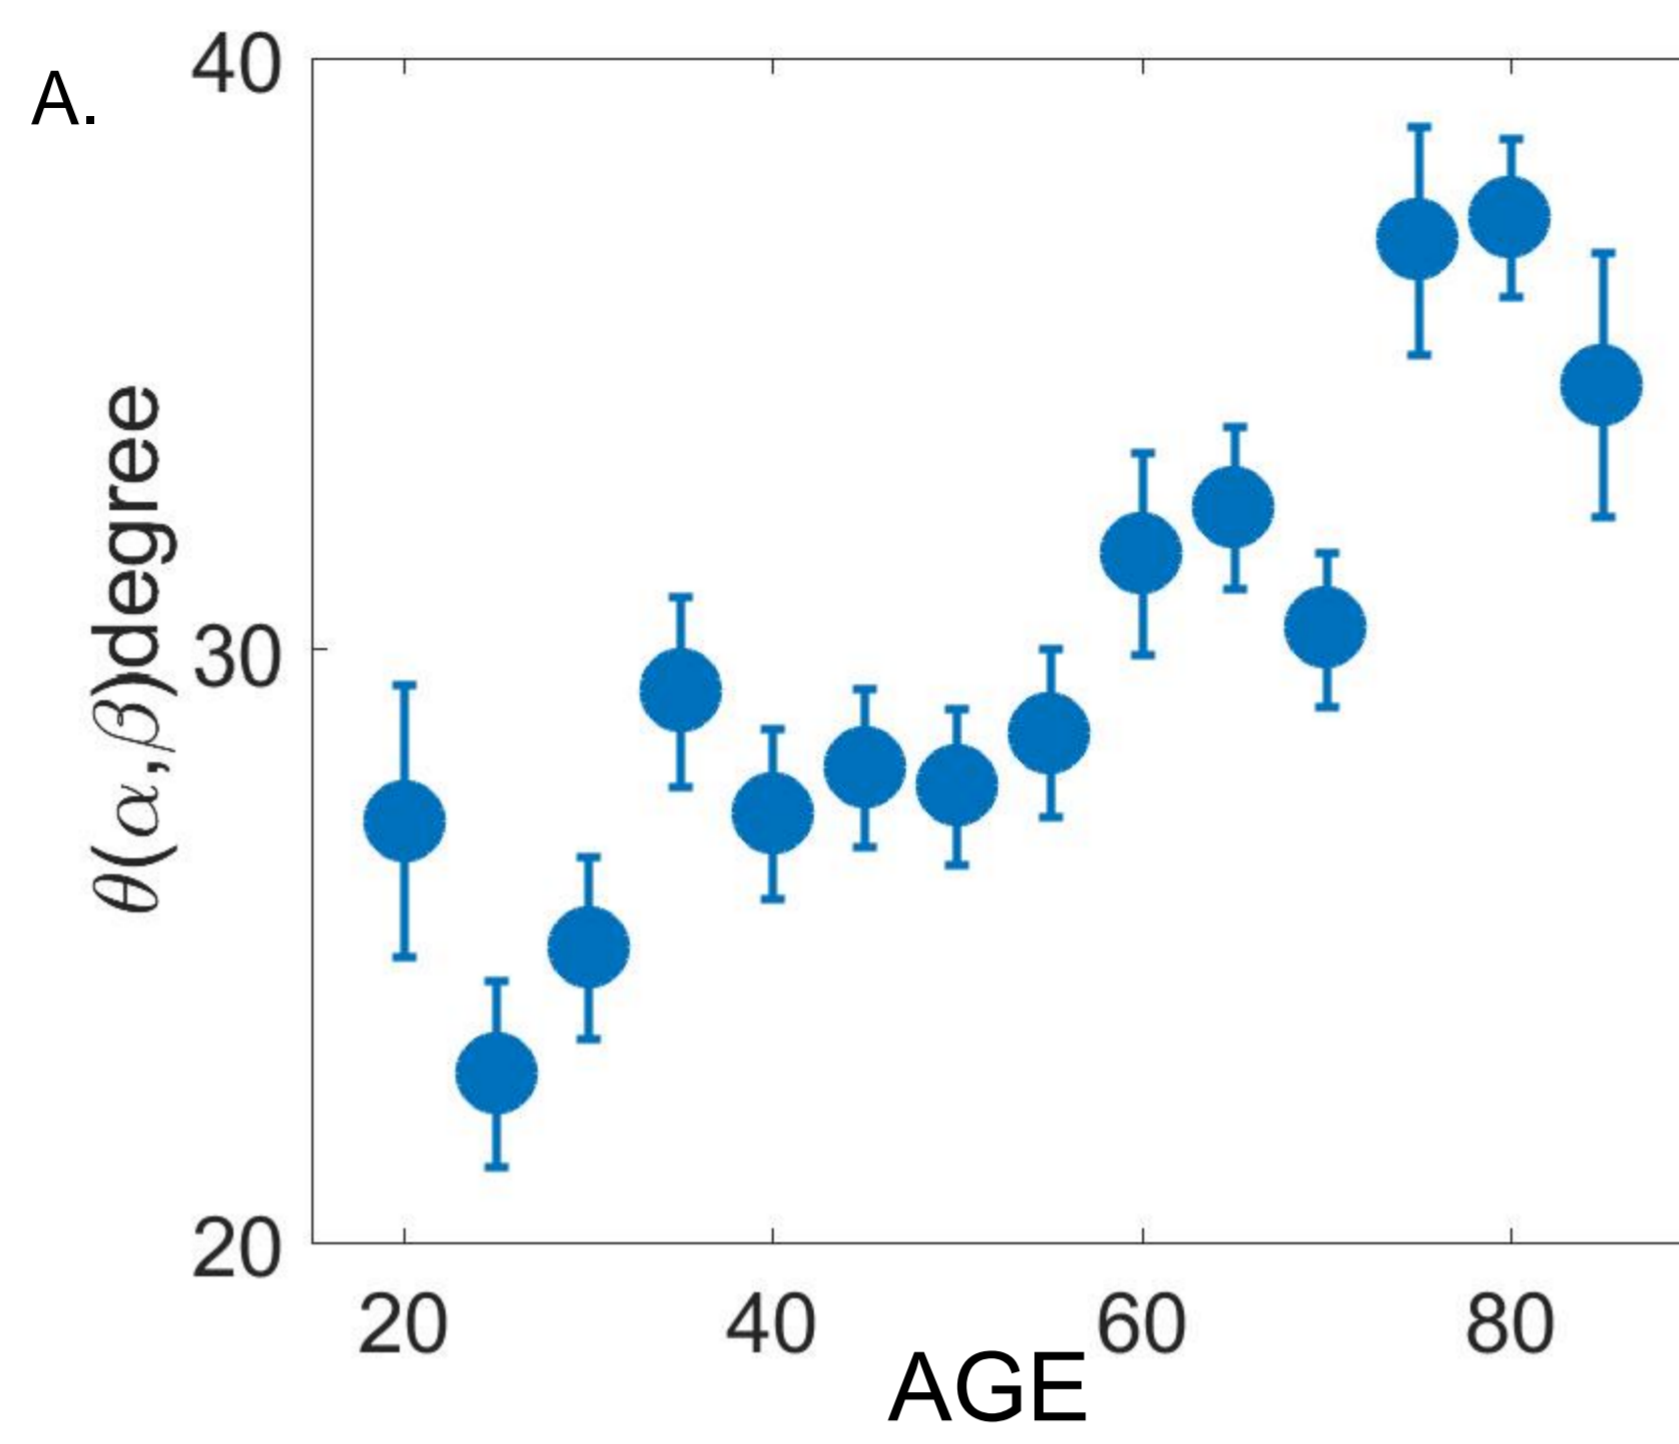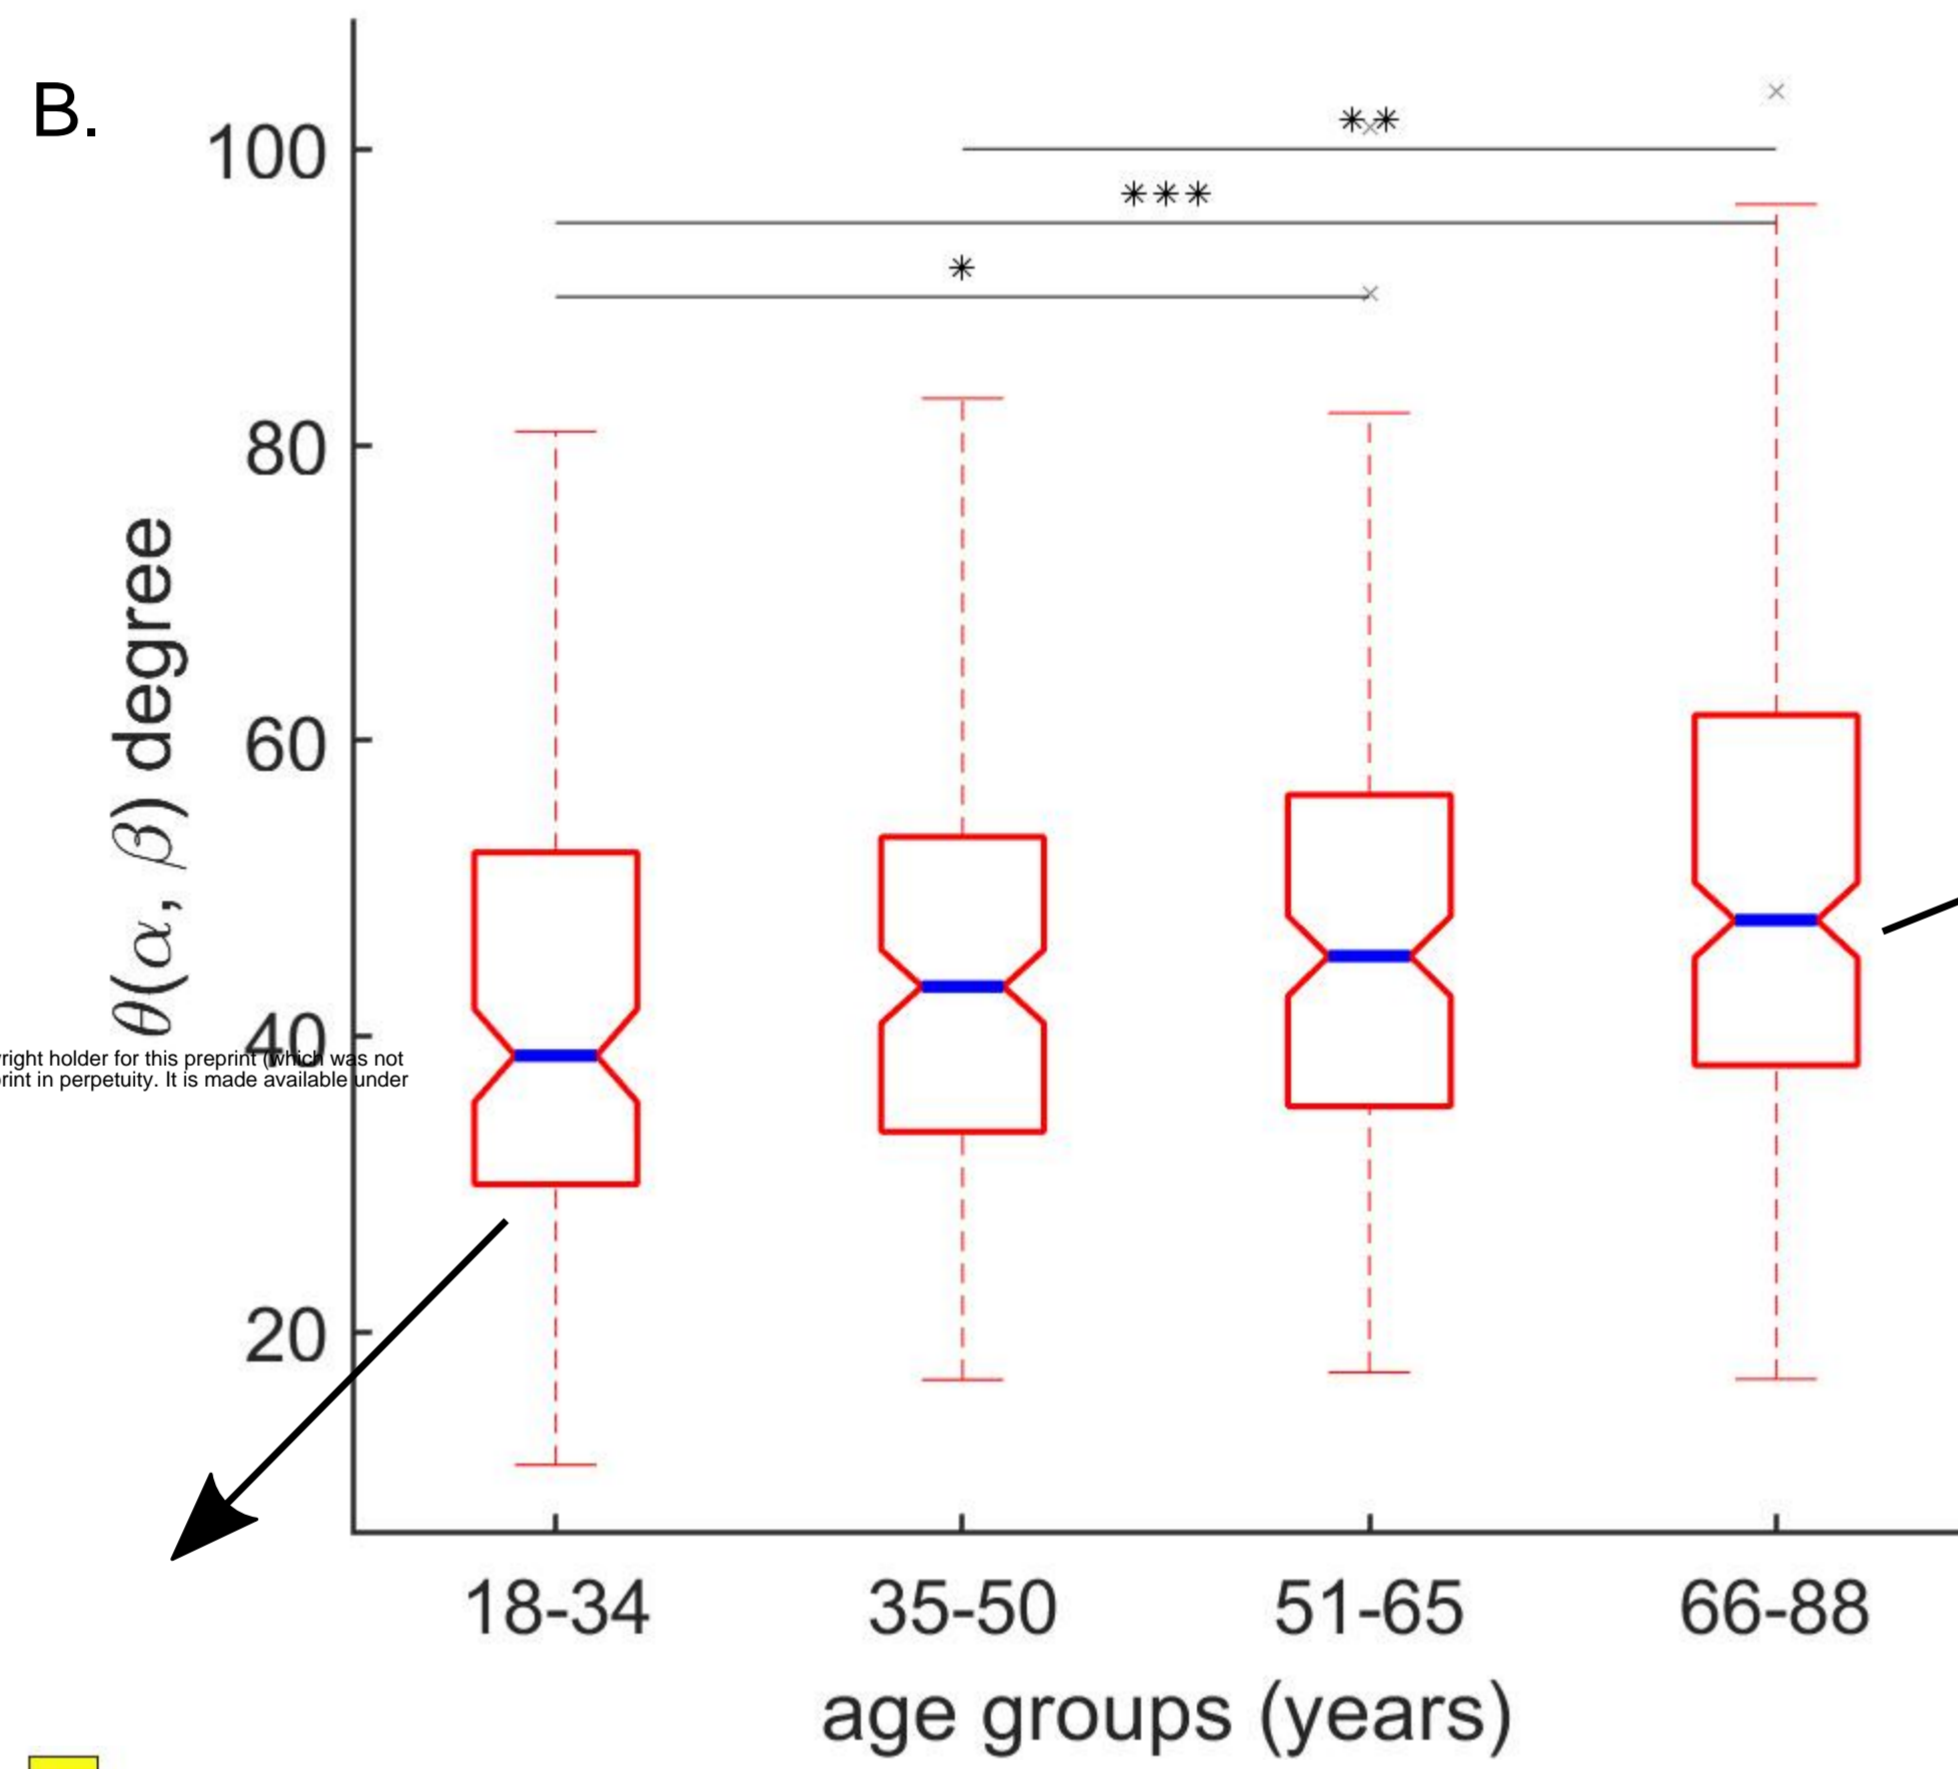

bioRxiv preprint doi: <https://doi.org/10.1101/504589>; this version posted March 31, 2020. The copyright holder for this preprint (which was not certified by peer review) is the author/funder, who has granted bioRxiv a license to display the preprint in perpetuity. It is made available under aCC-BY-NC-ND 4.0 International license.

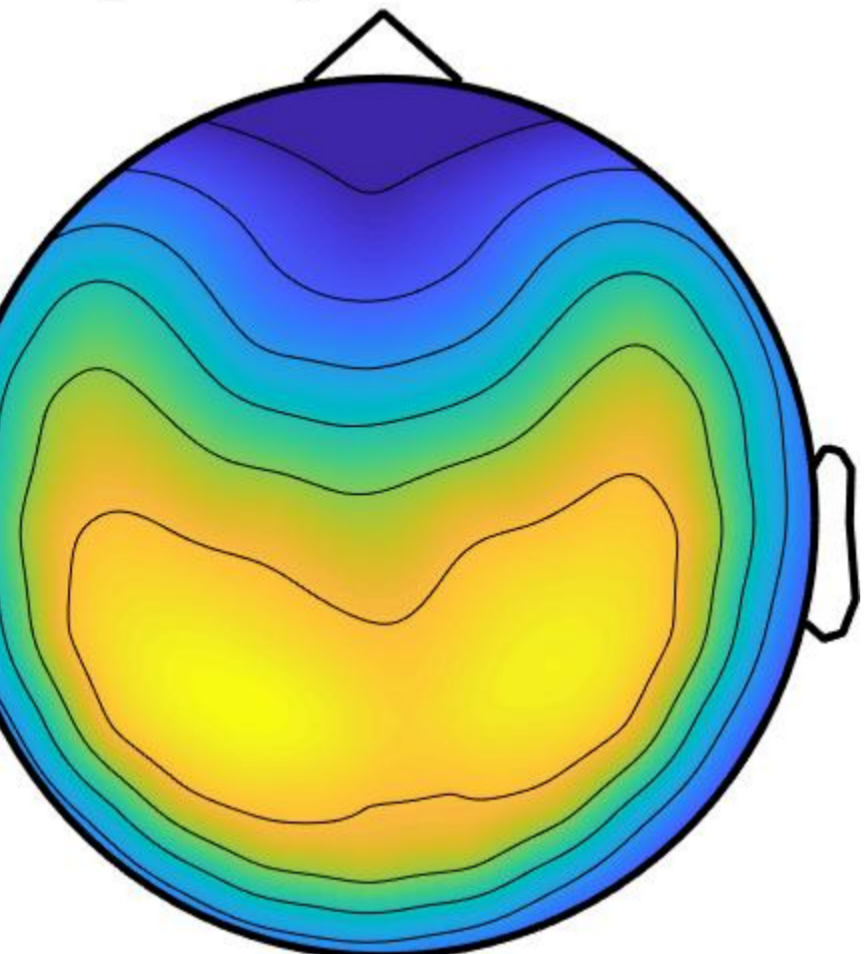

beta power YA

alpha power OA

beta power OA

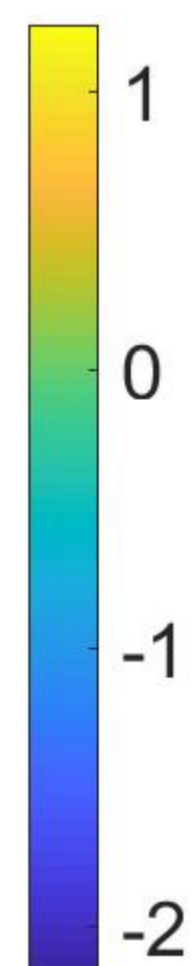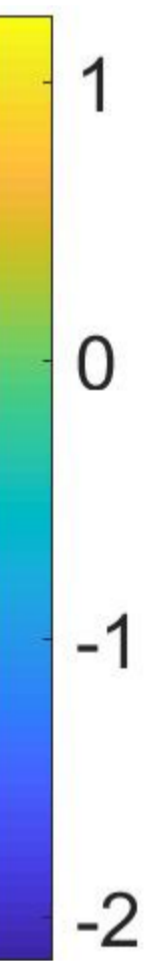



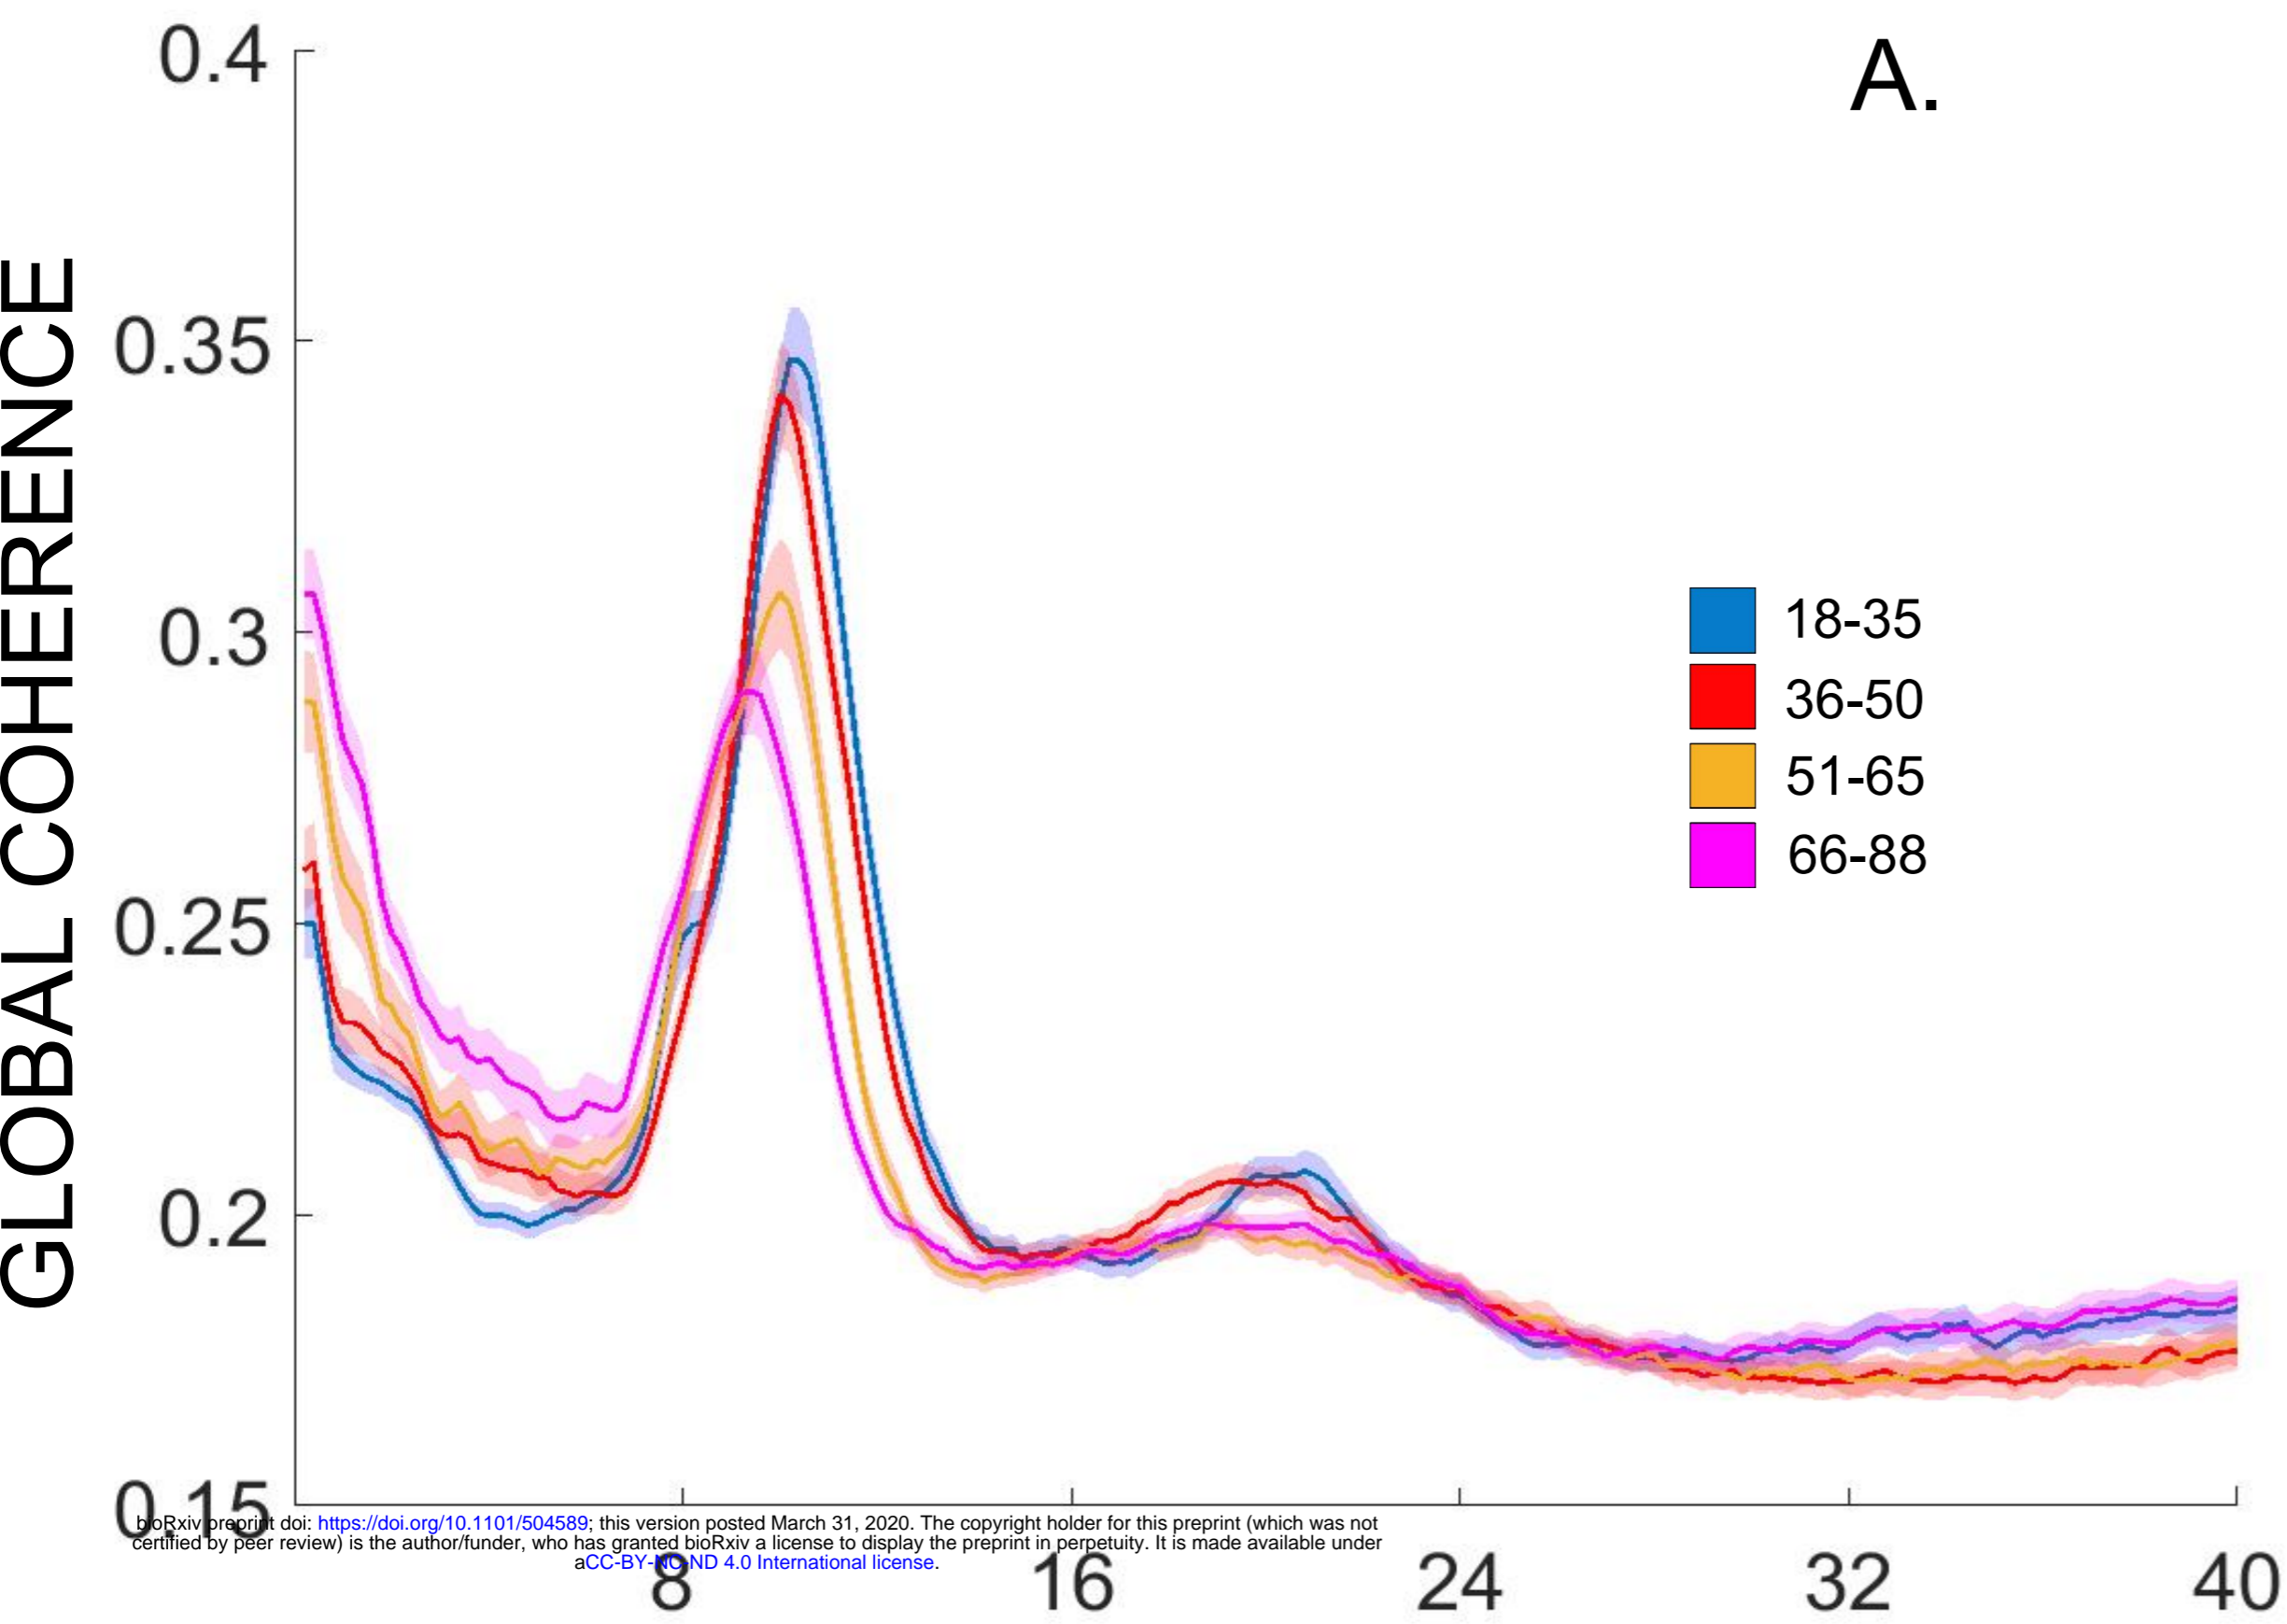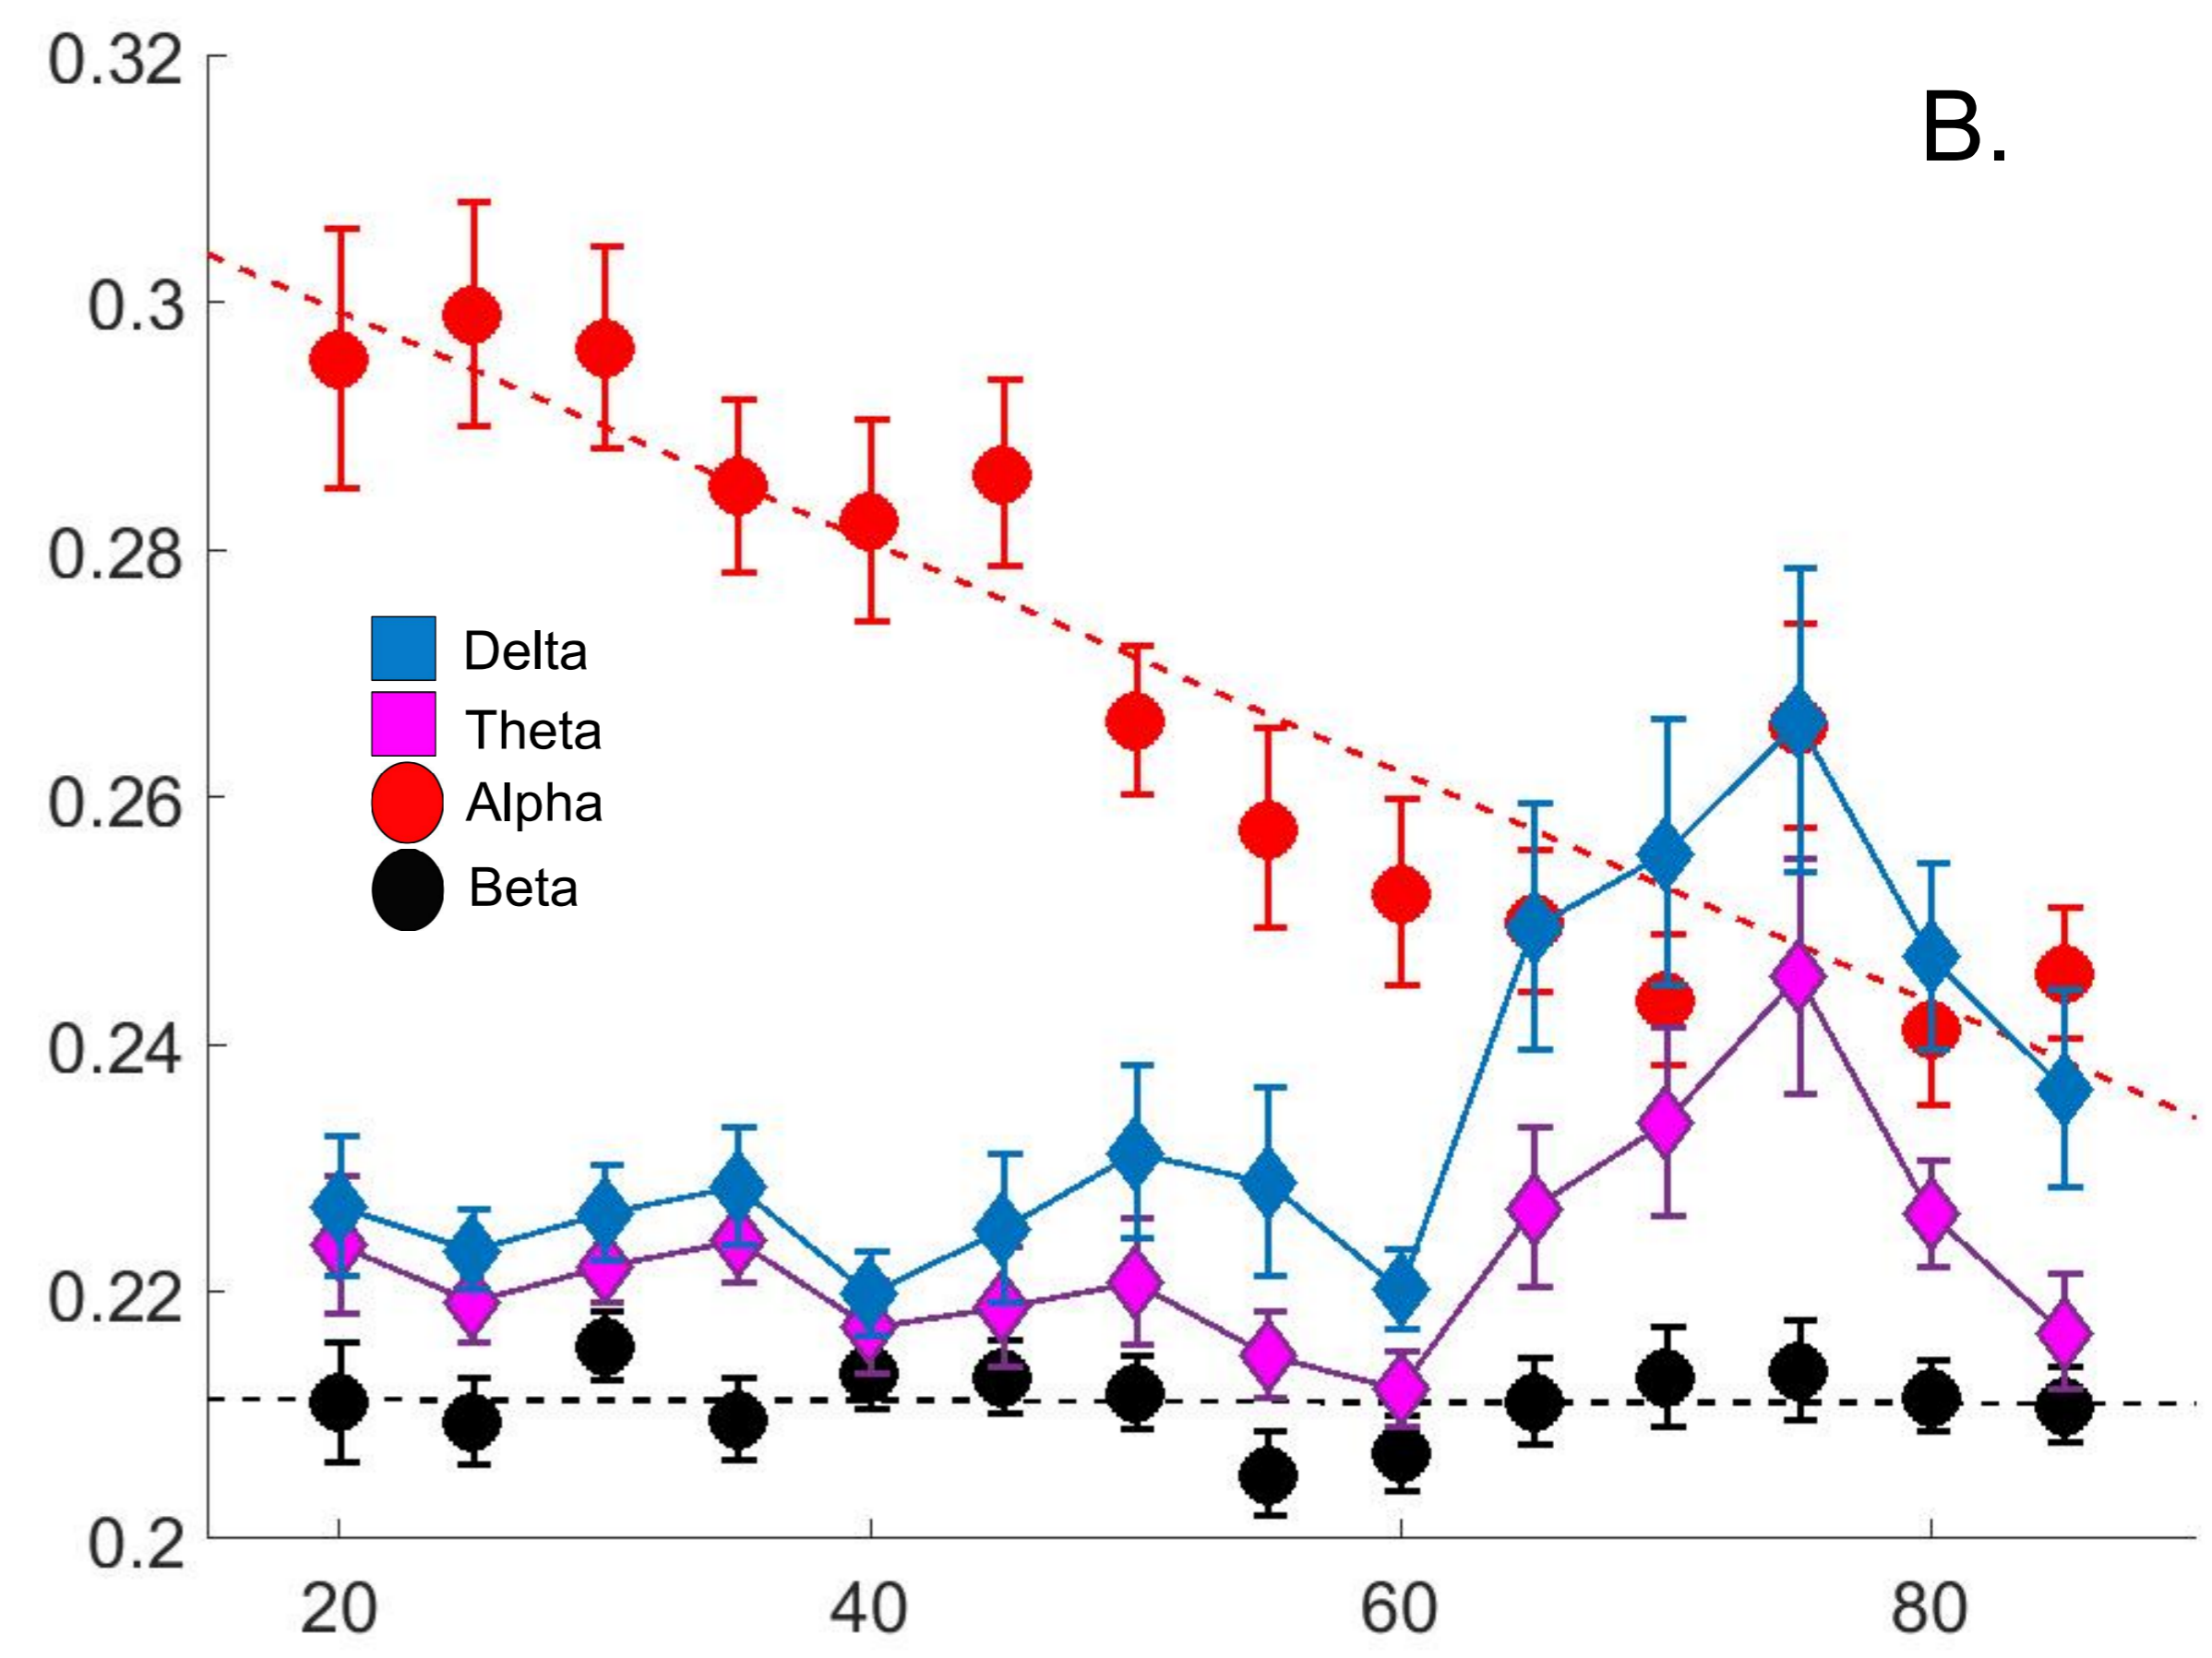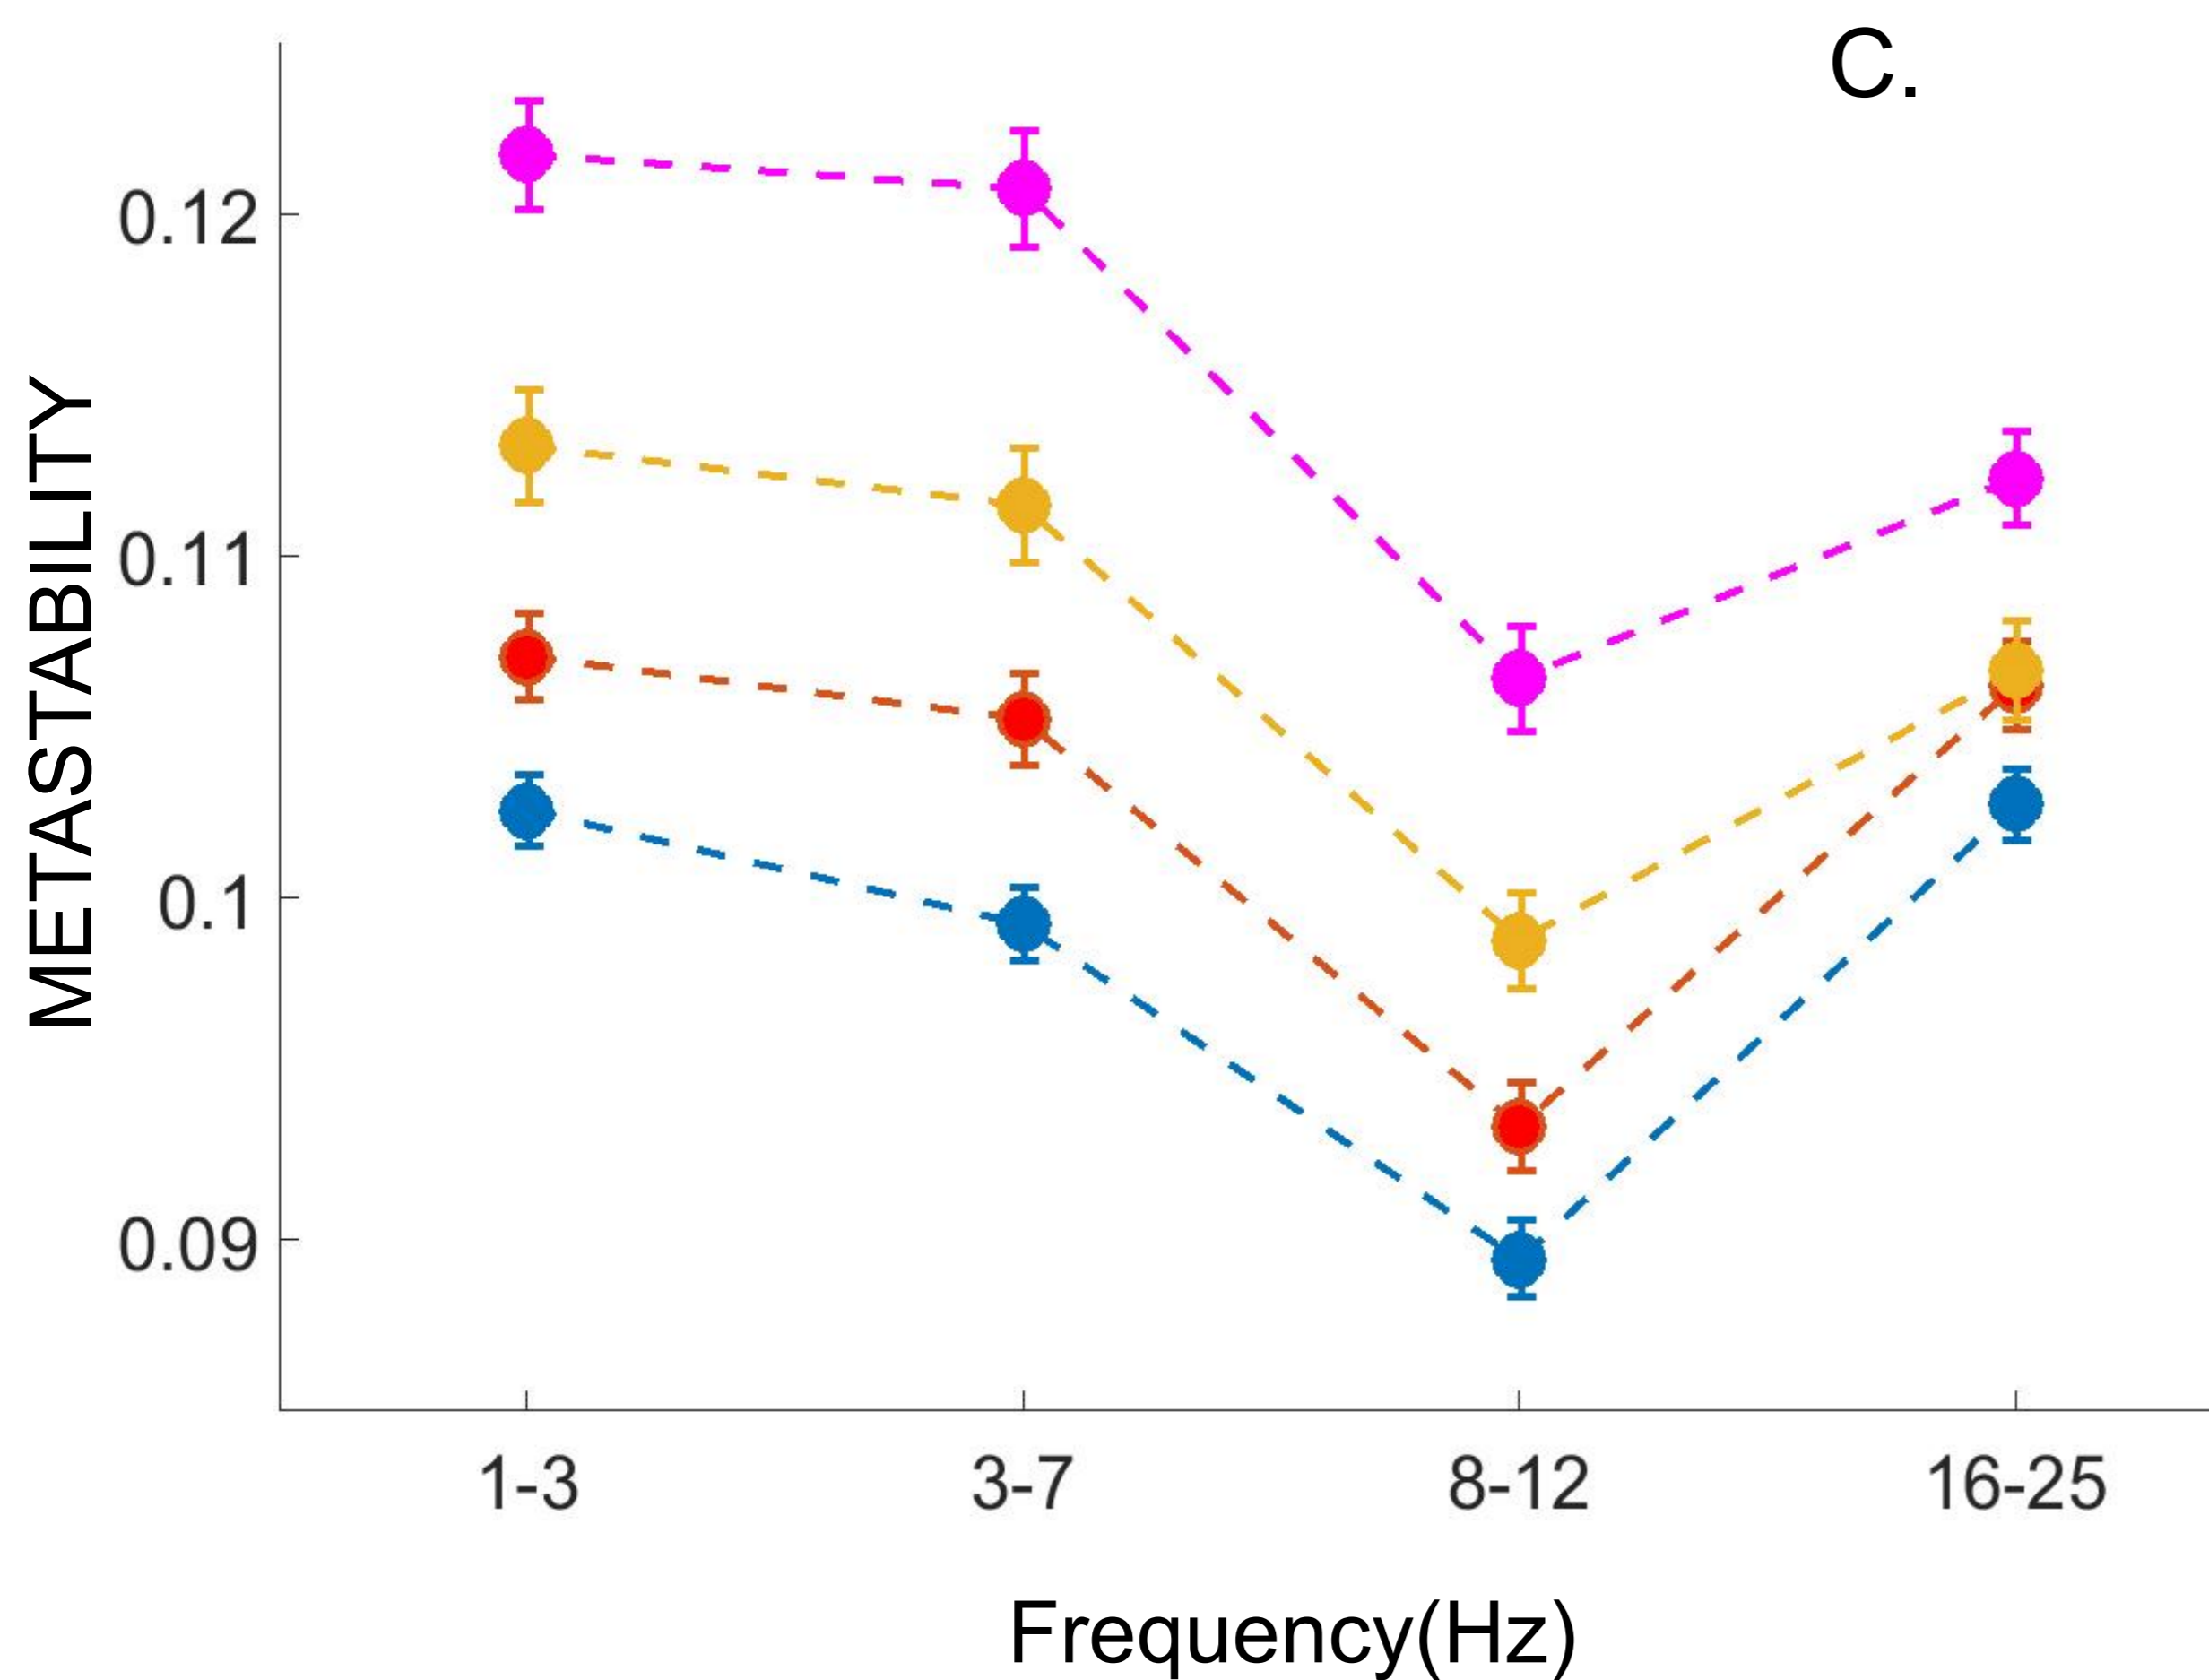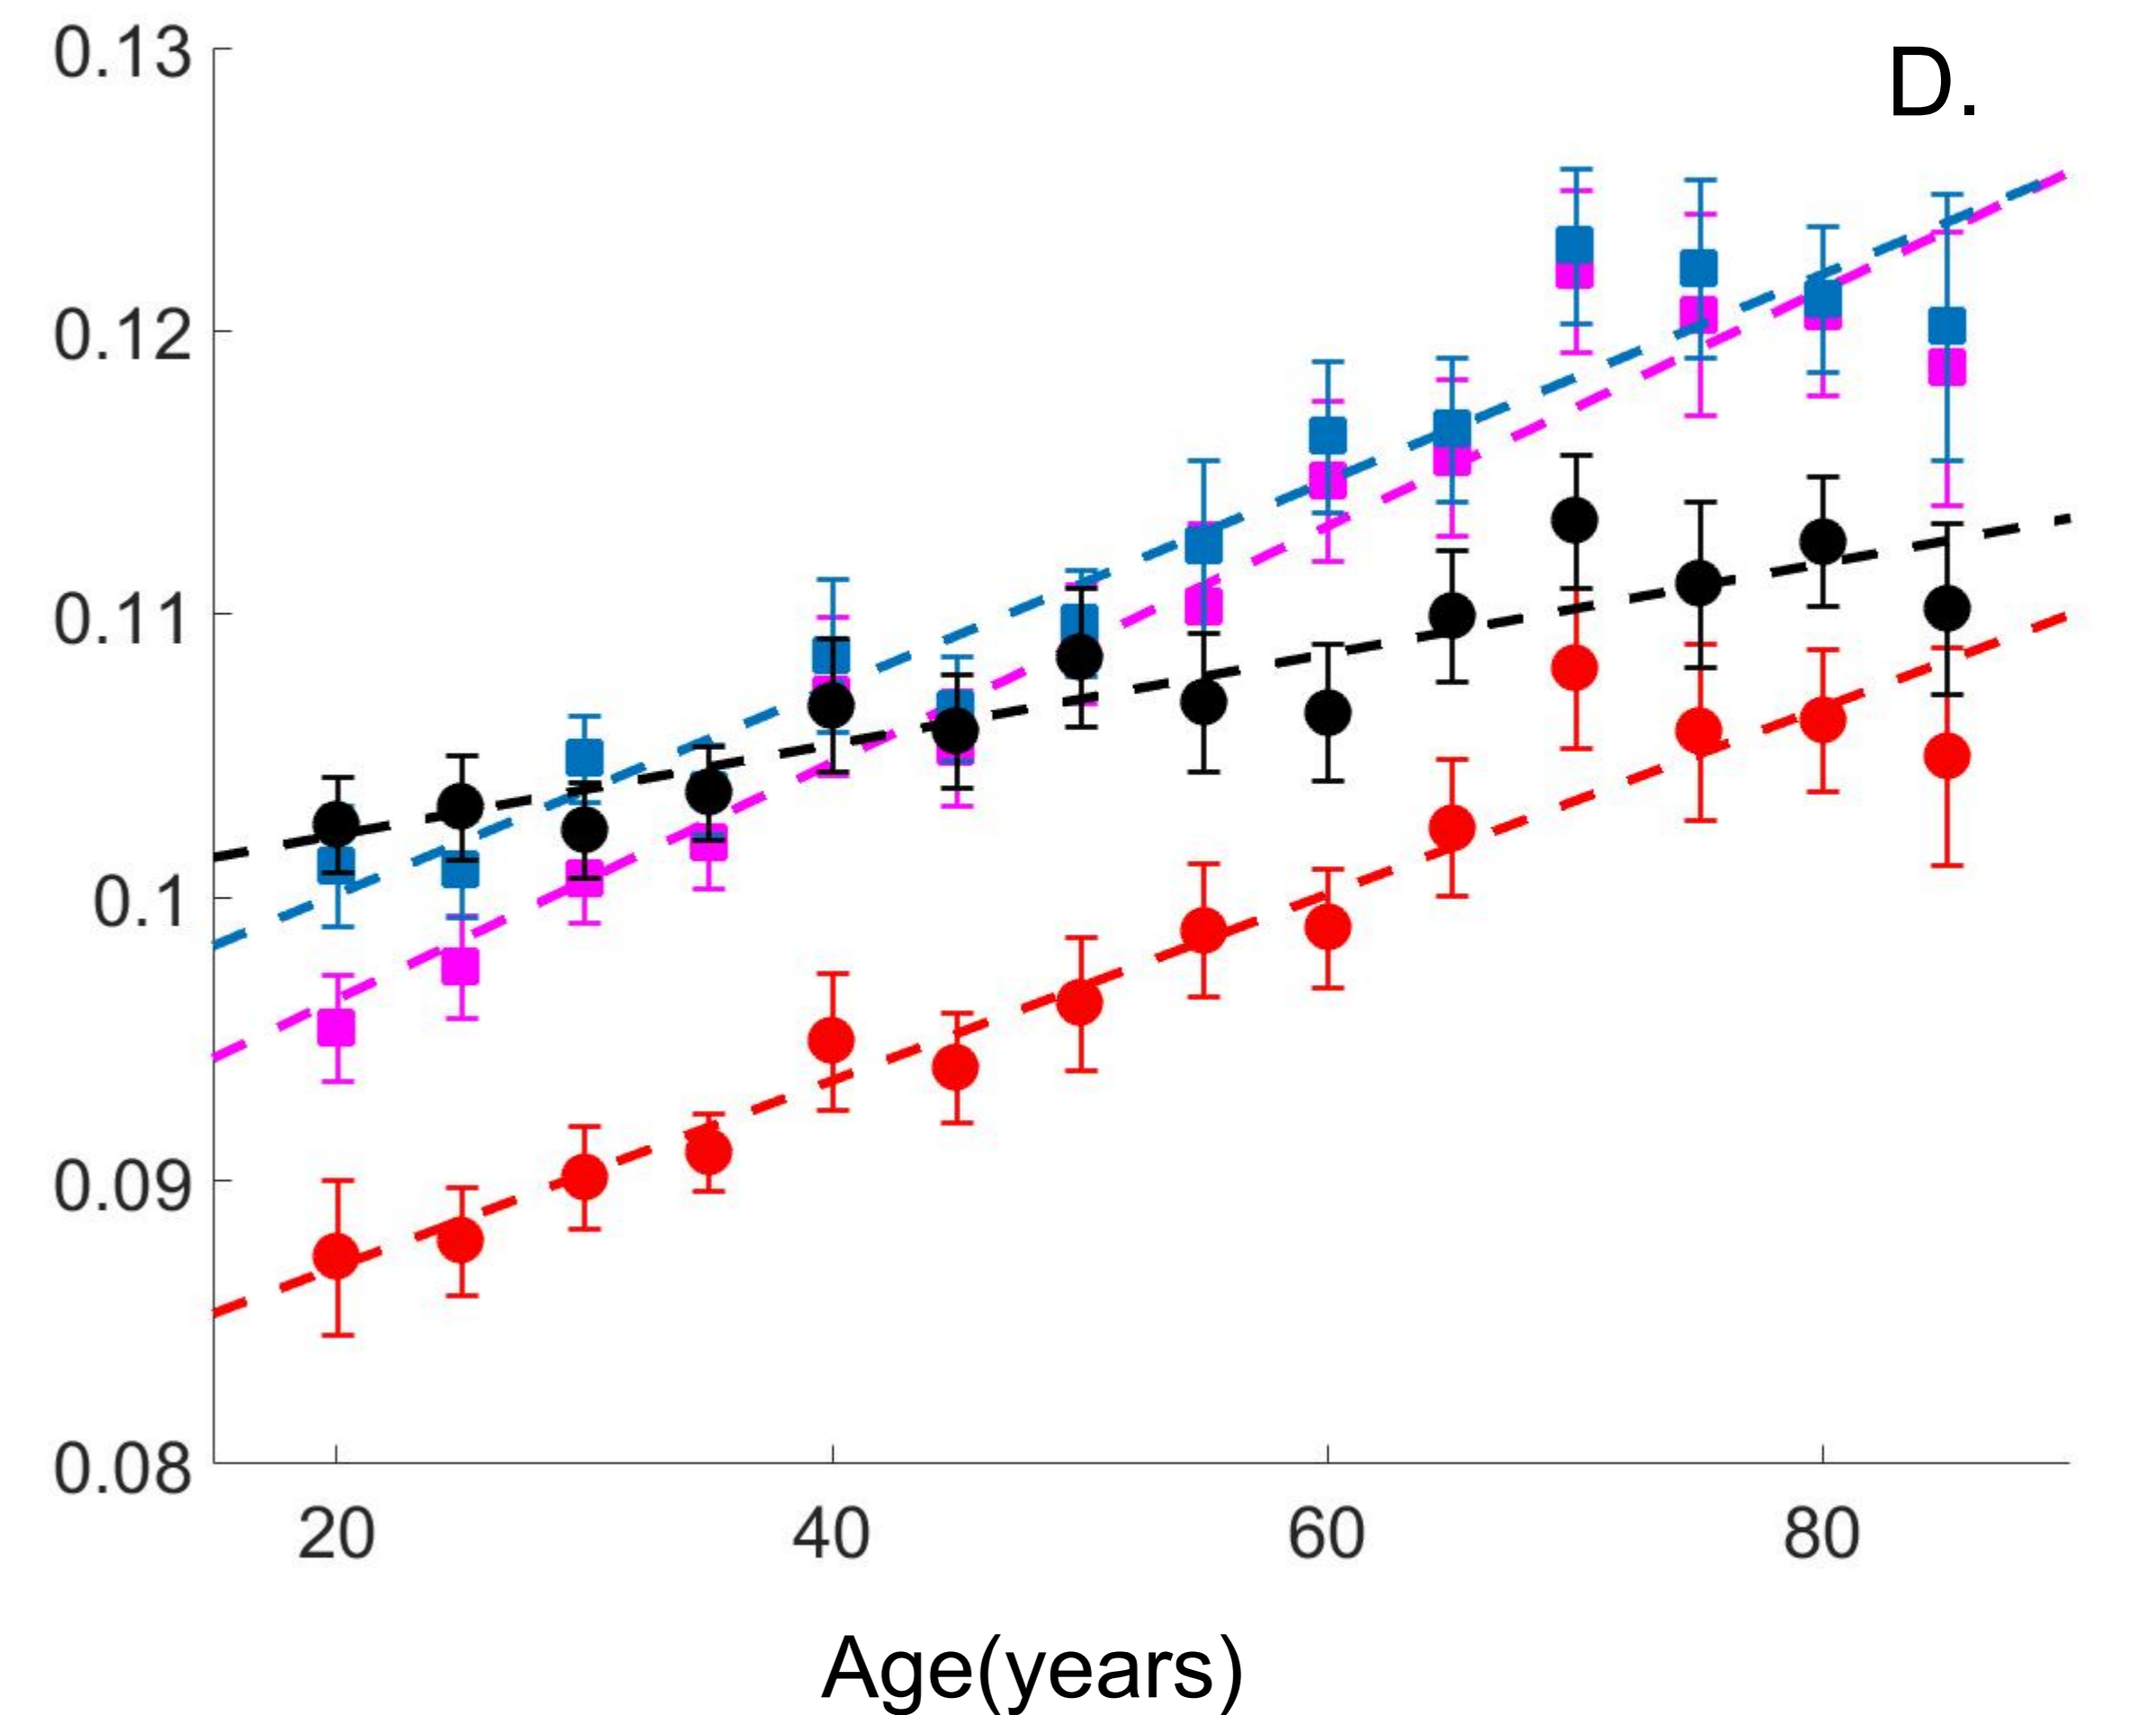



DELTA

THETA

ALPHA

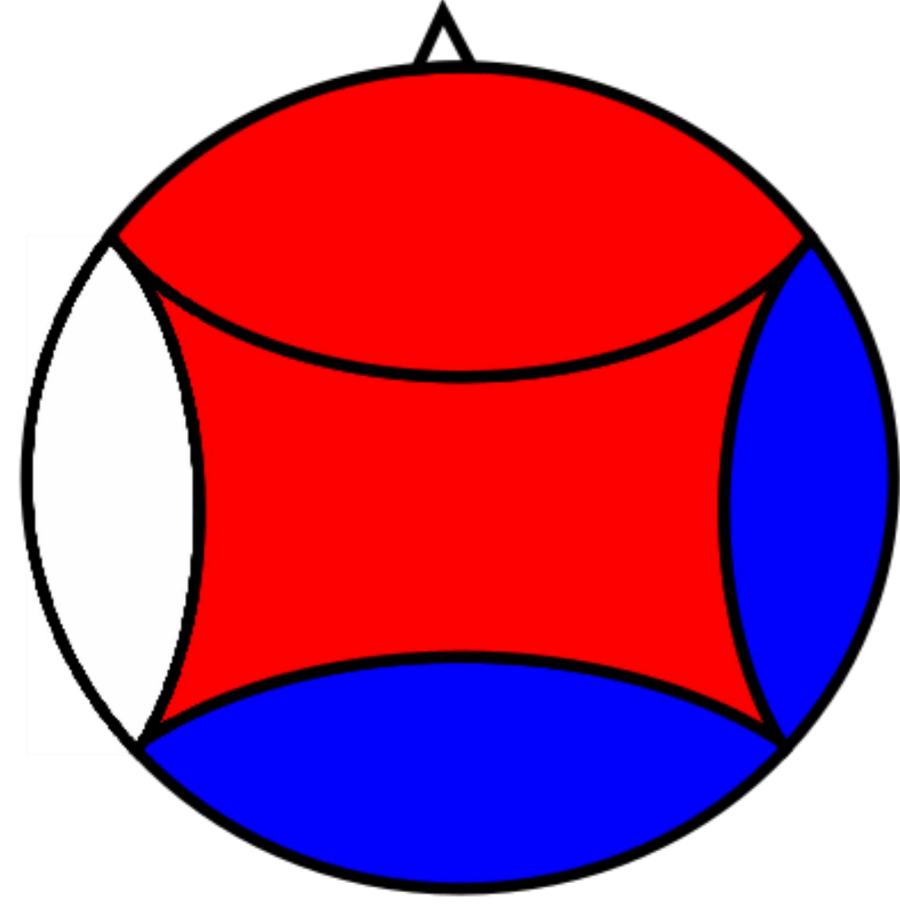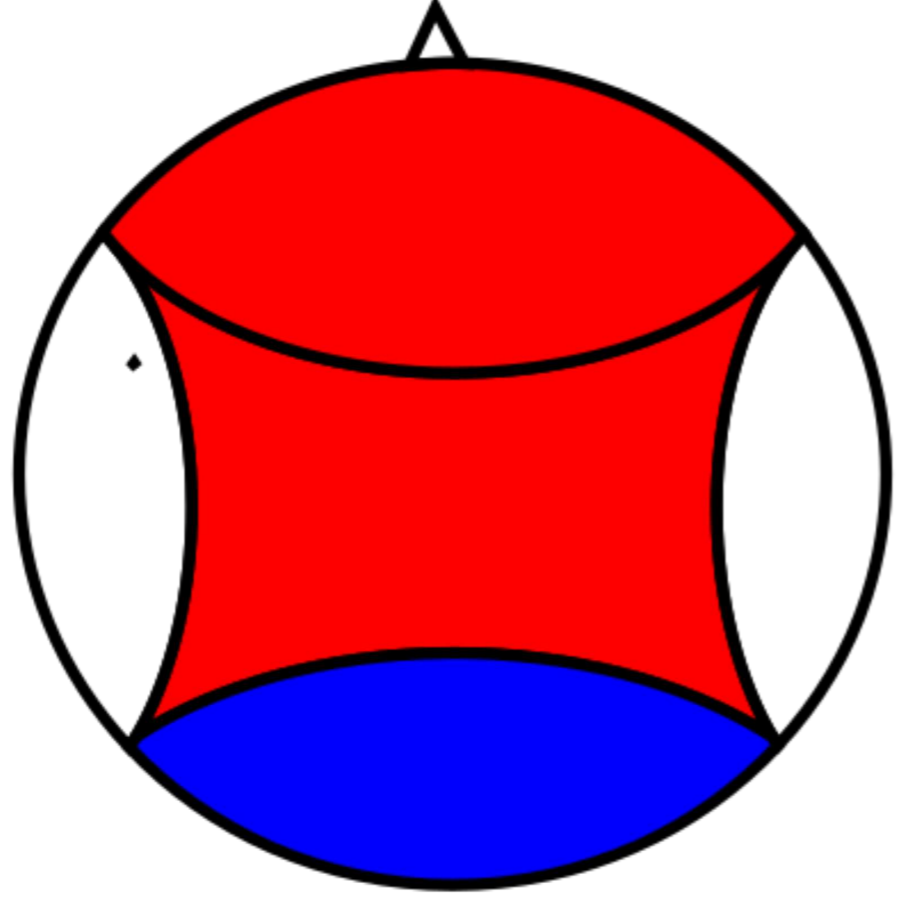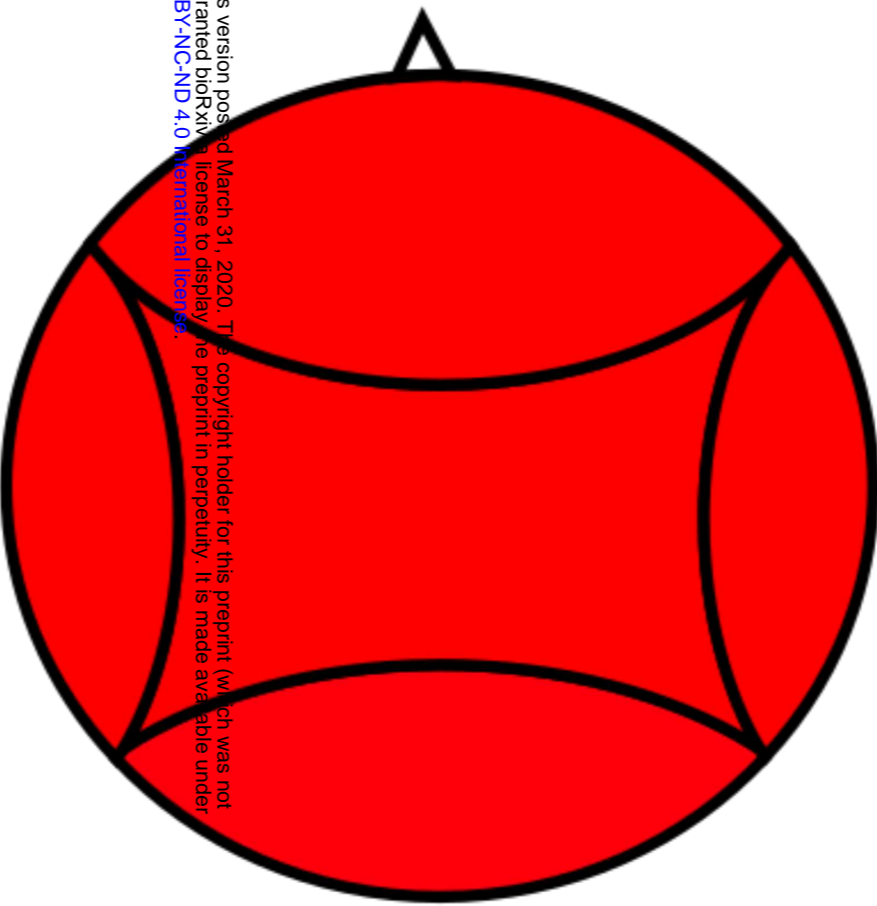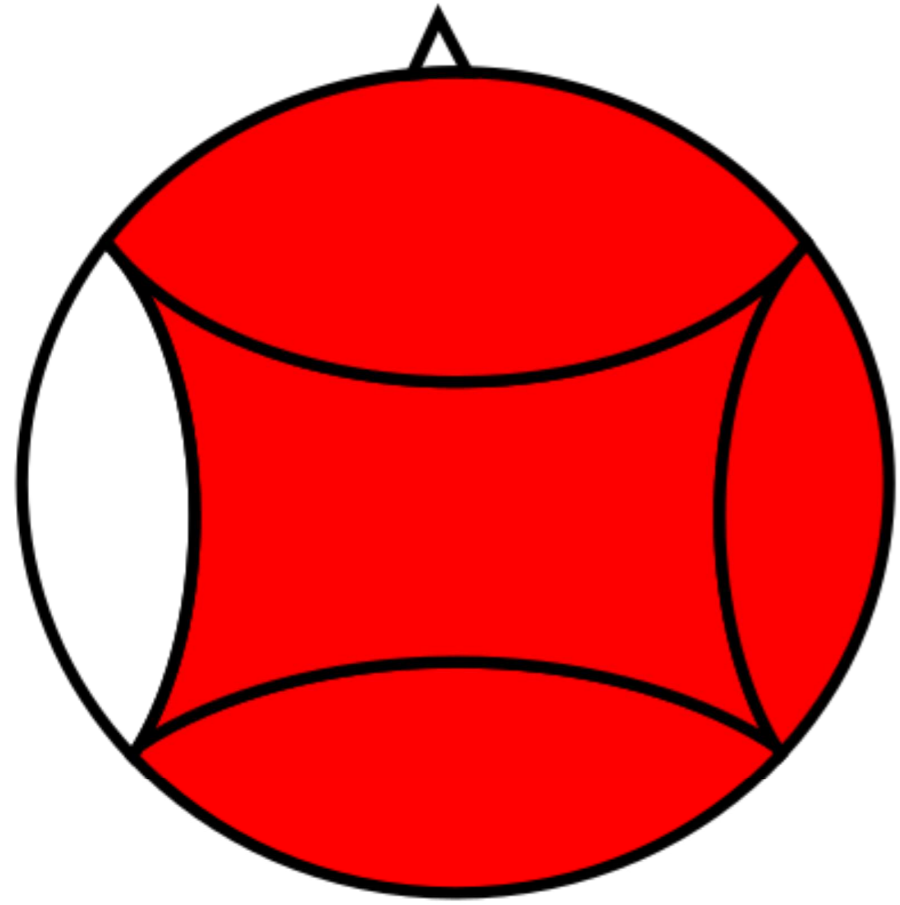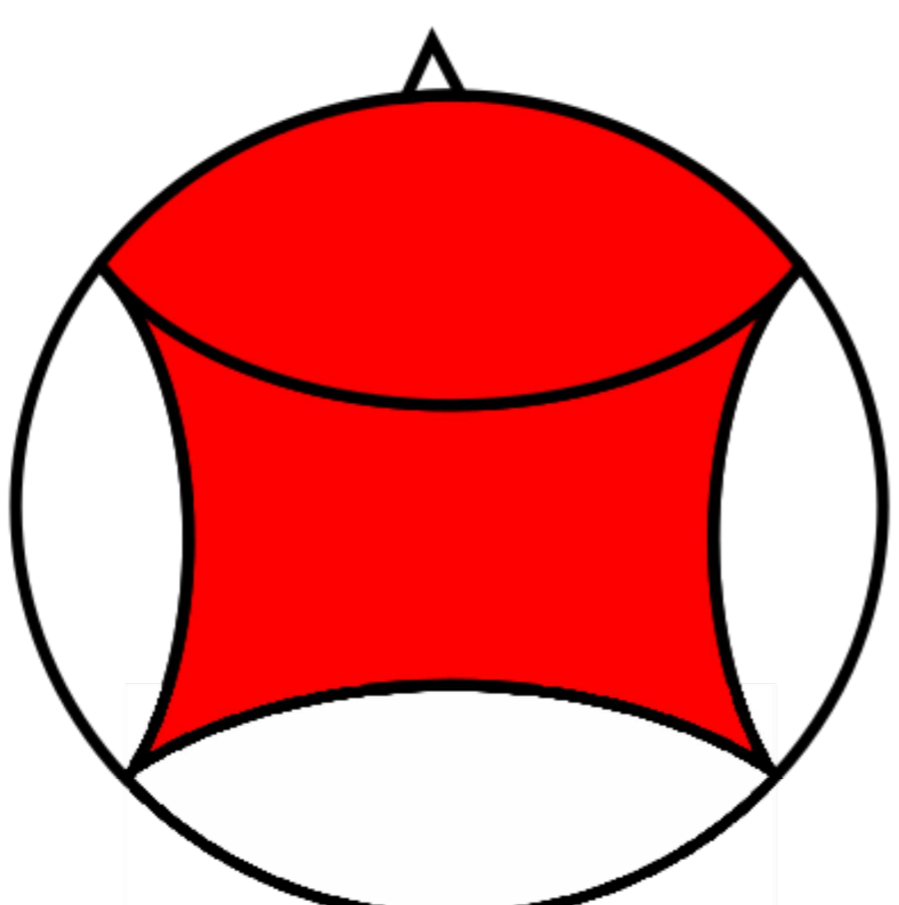

BETA(16-20)

BETA(20-25Hz)

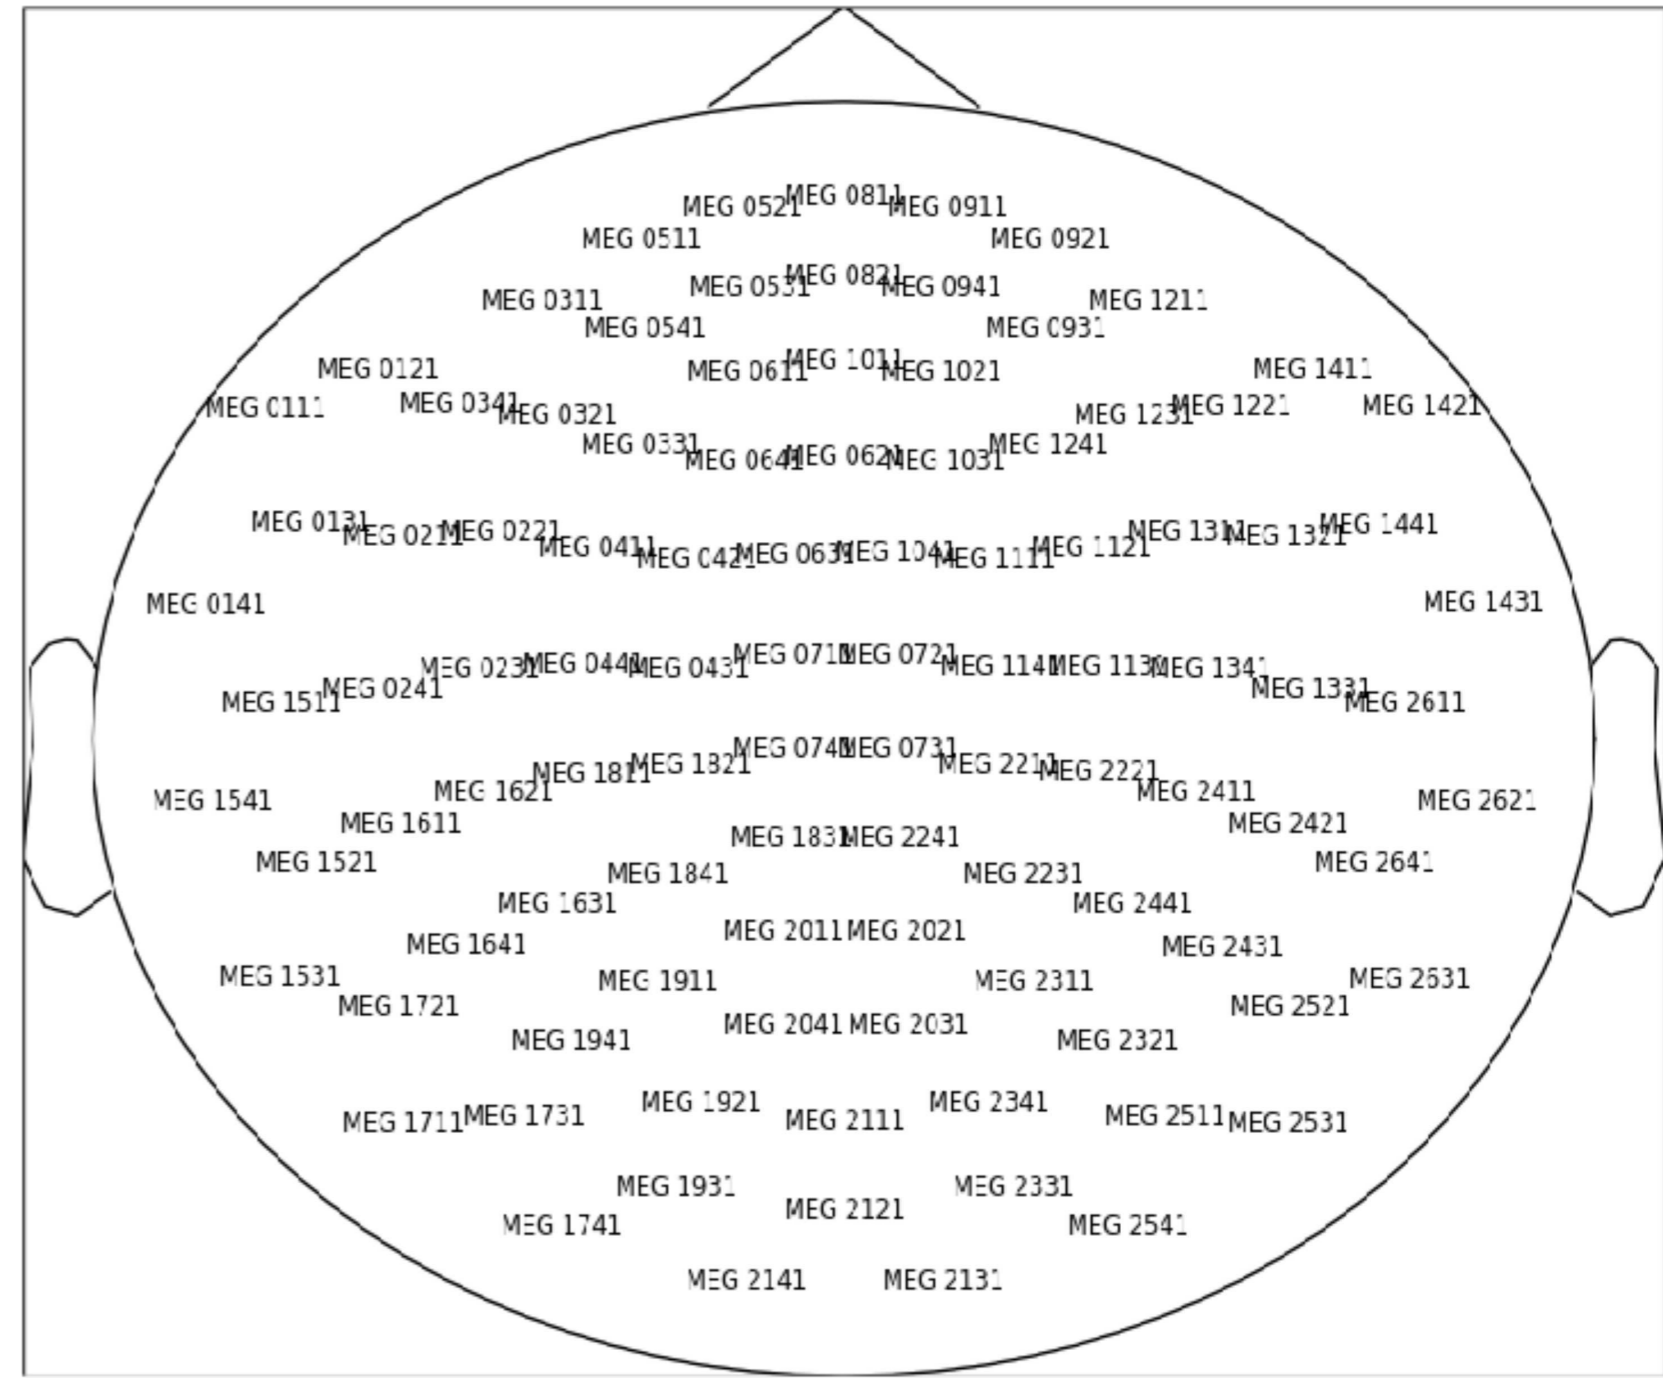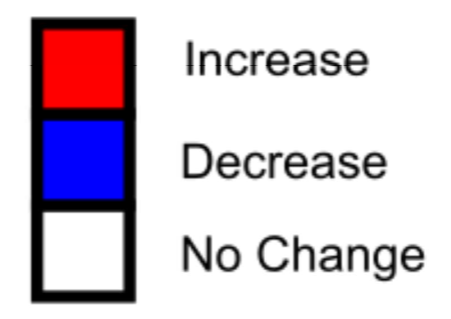



GLOBAL COHERENCE

METASTABILITY

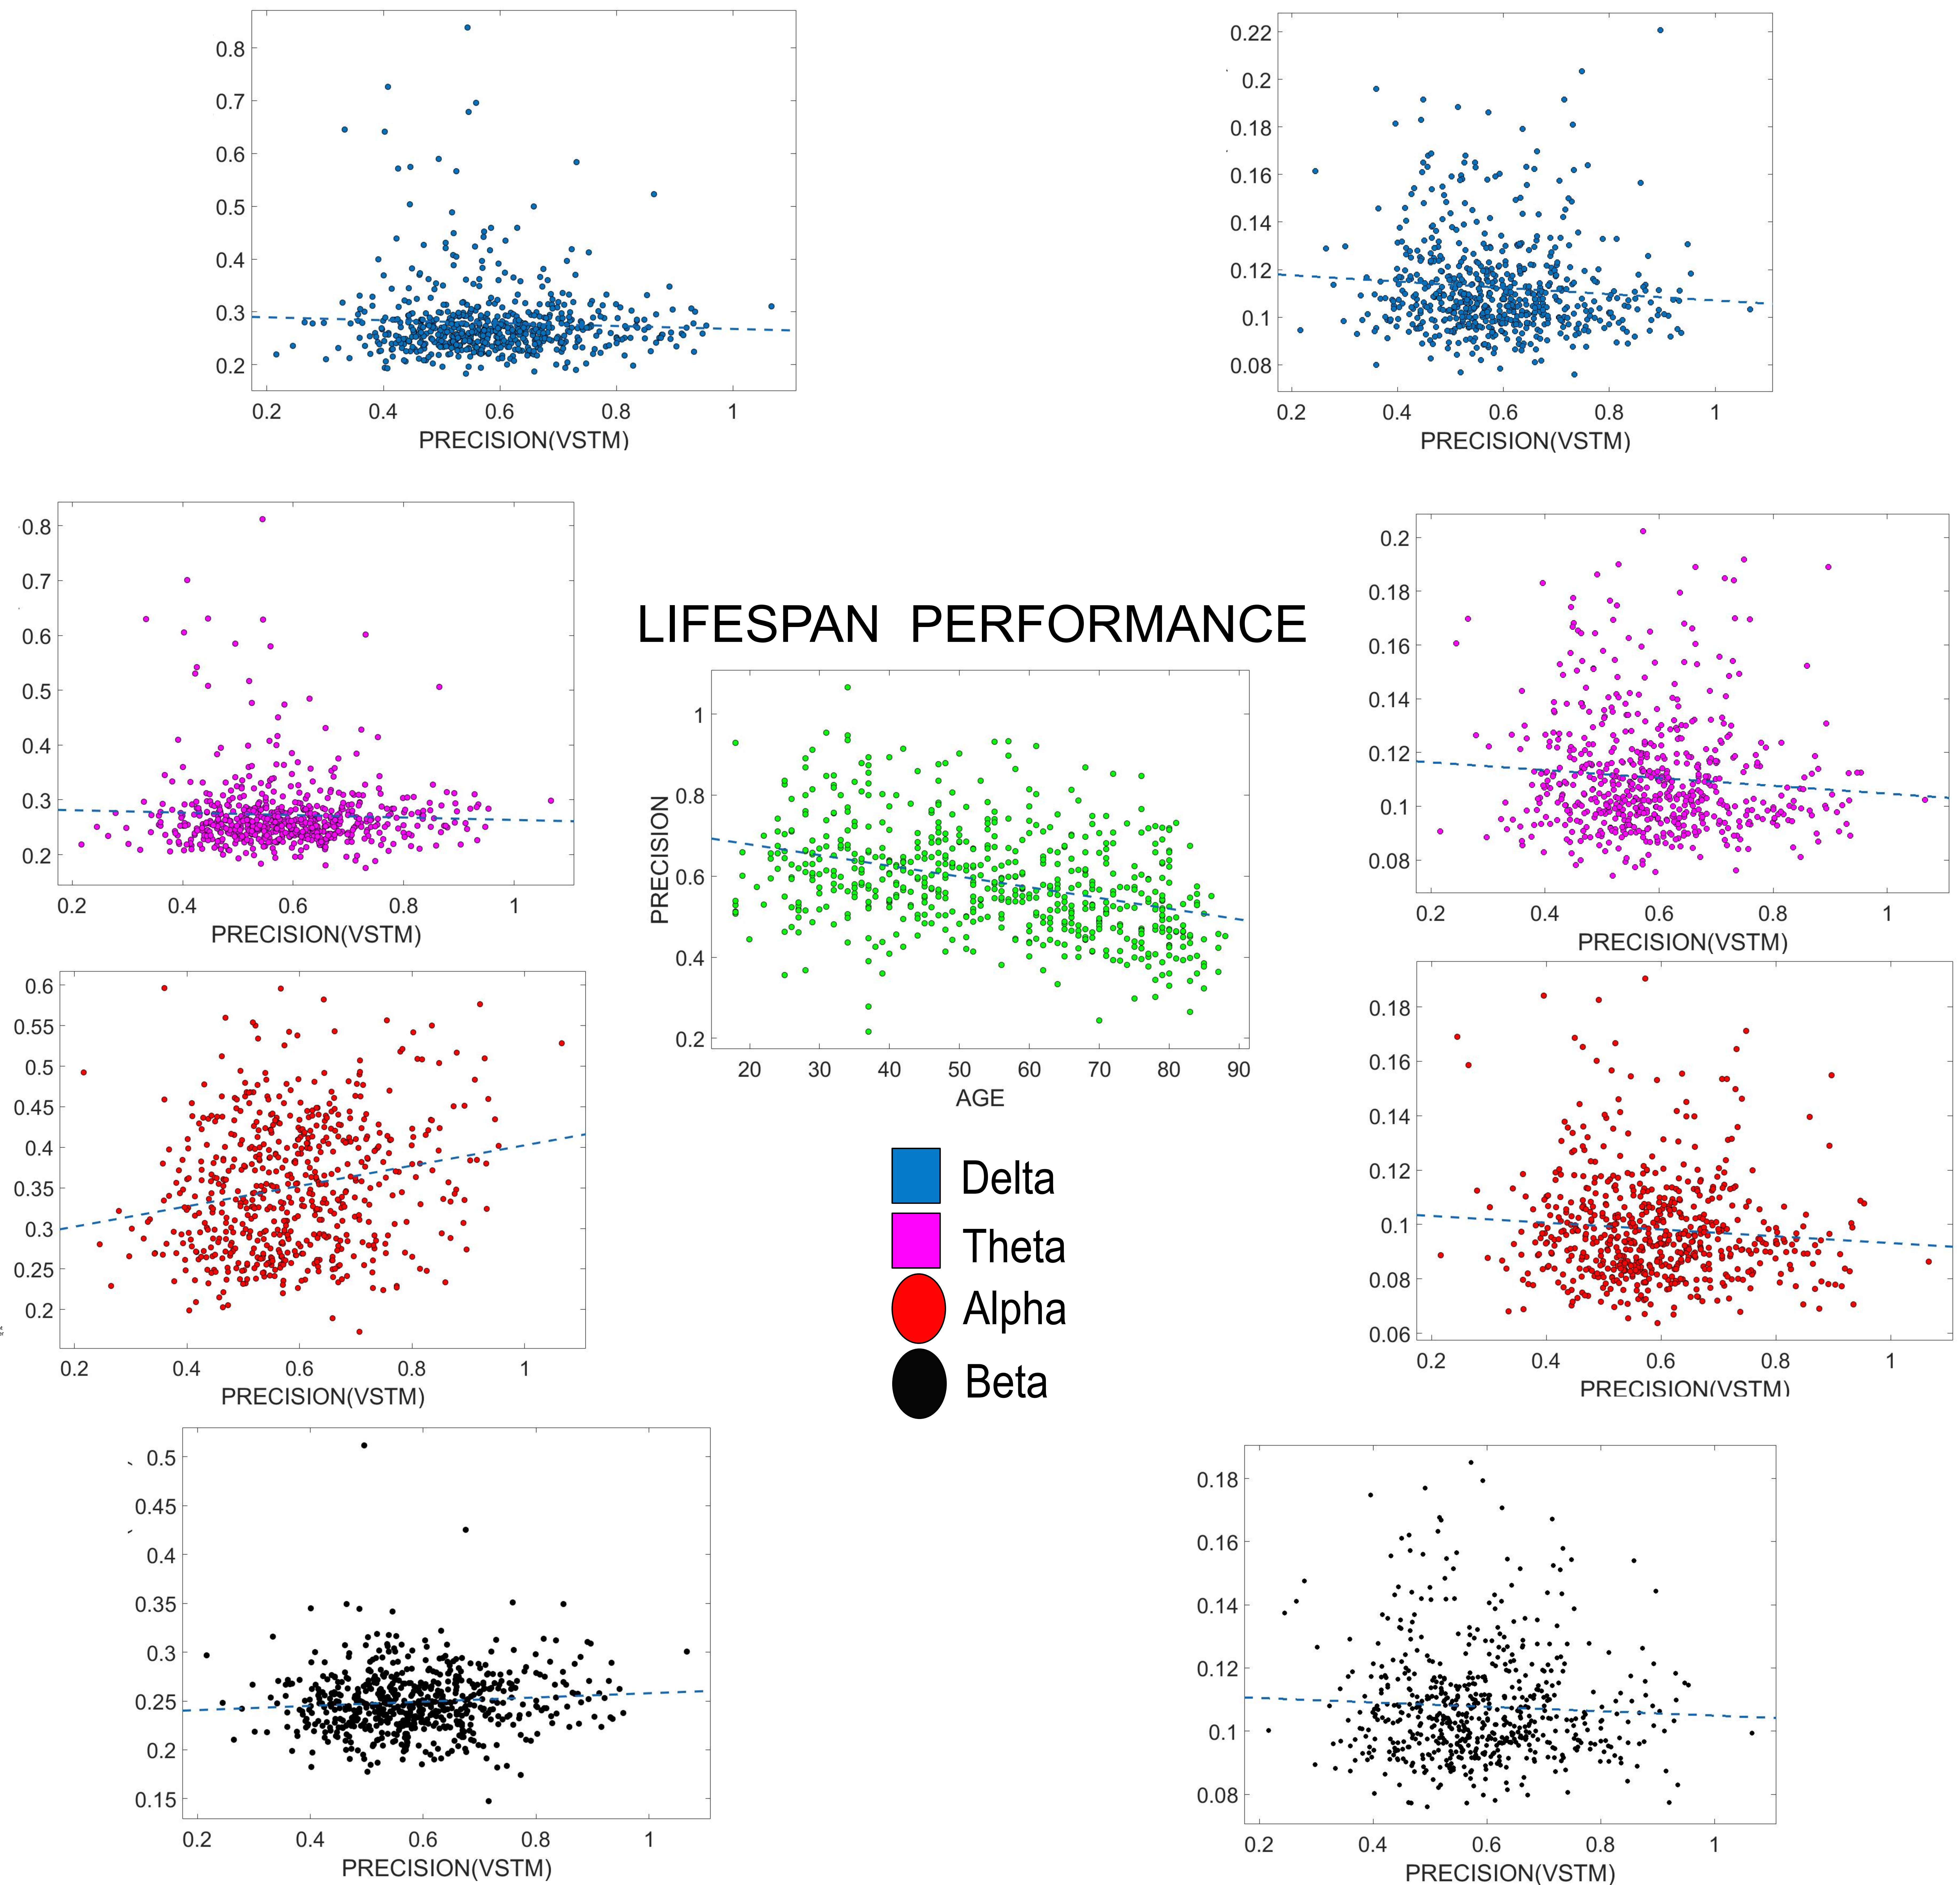



Fig S1. Boxplot of distribution of band limited power in the beta band (16-25 Hz). Blue line indicates the median of each distribution. Notch denotes 95% confidence interval of the median

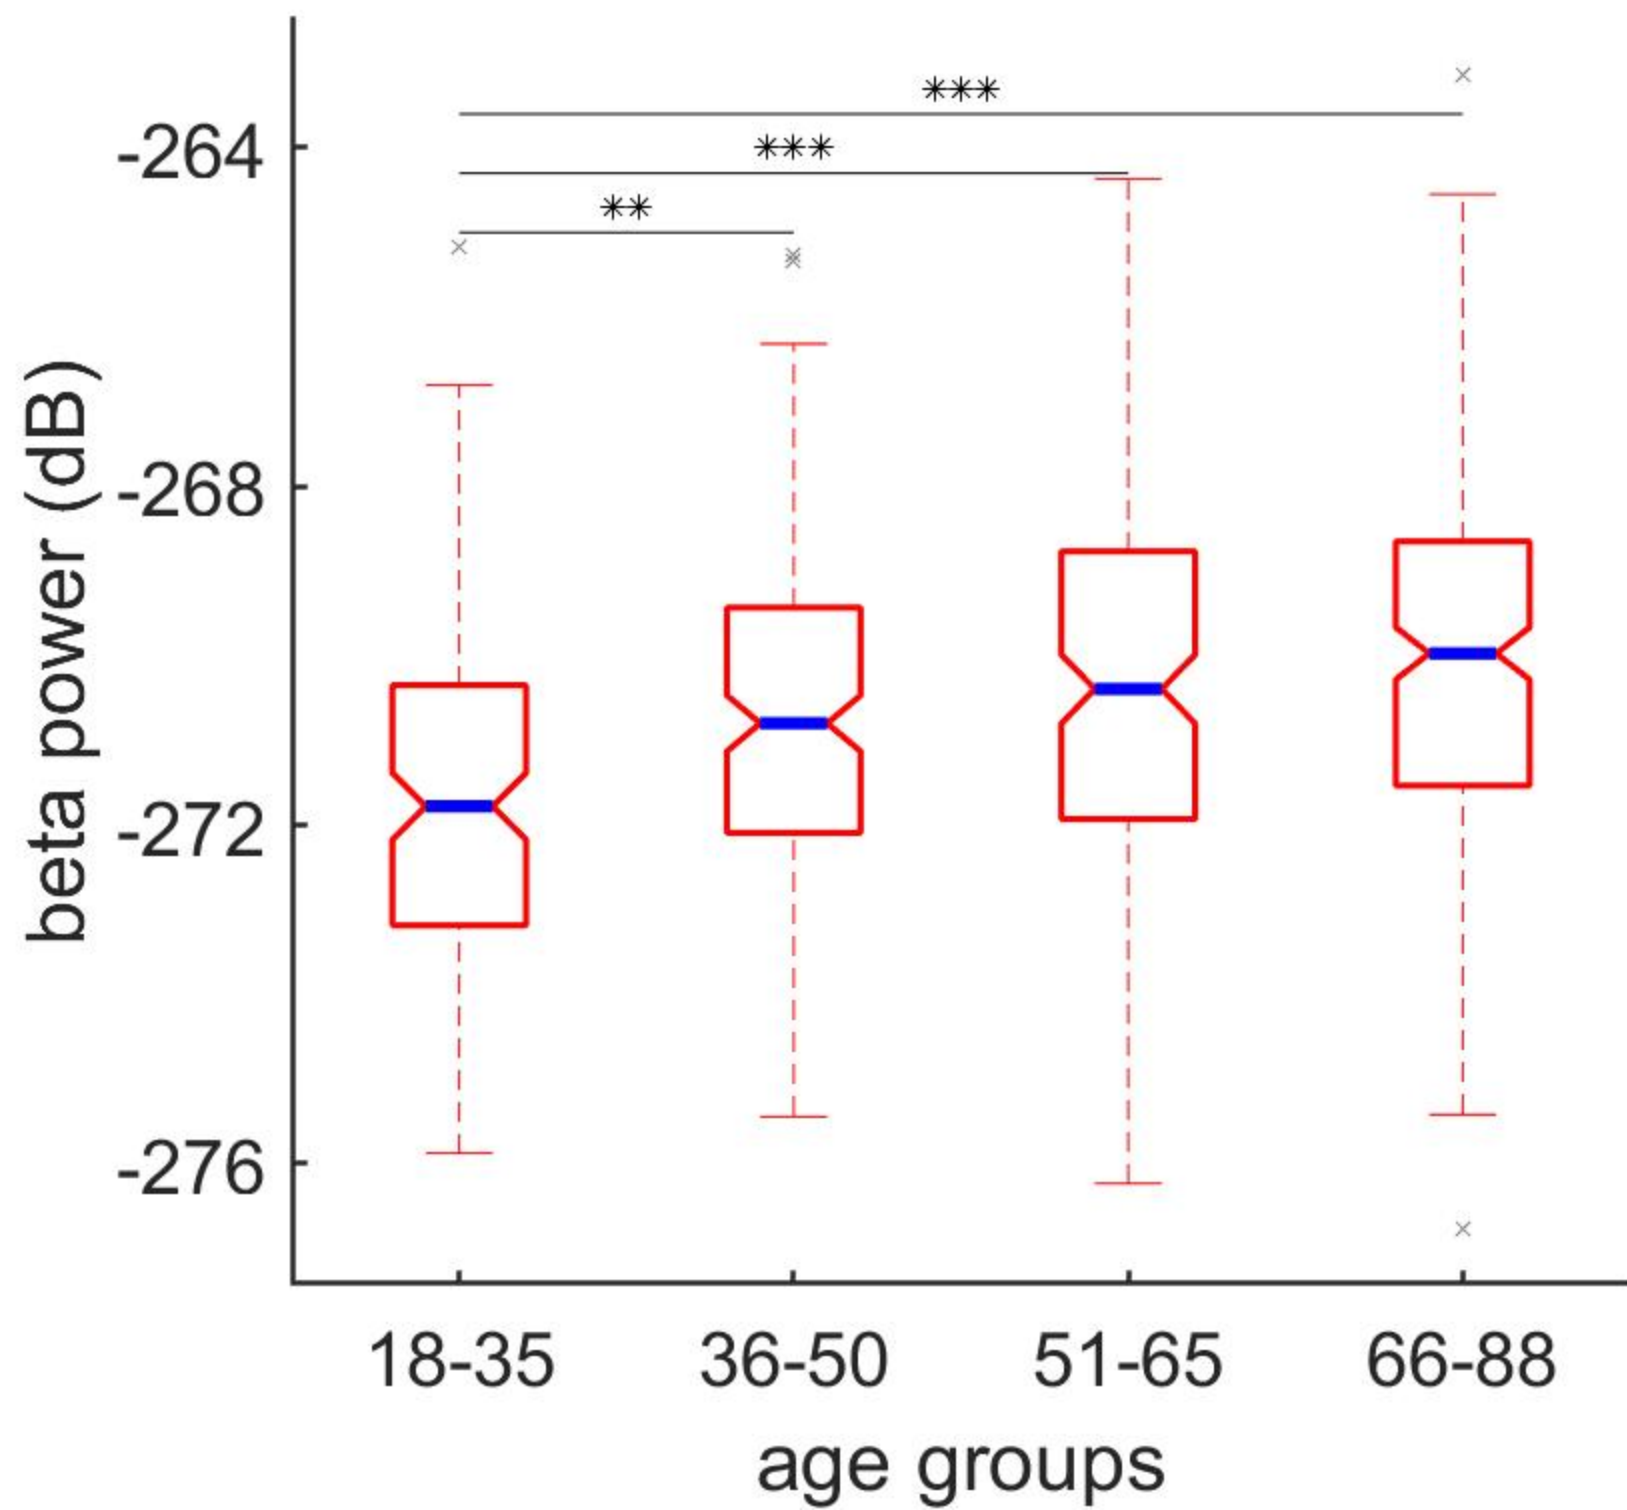

S2.

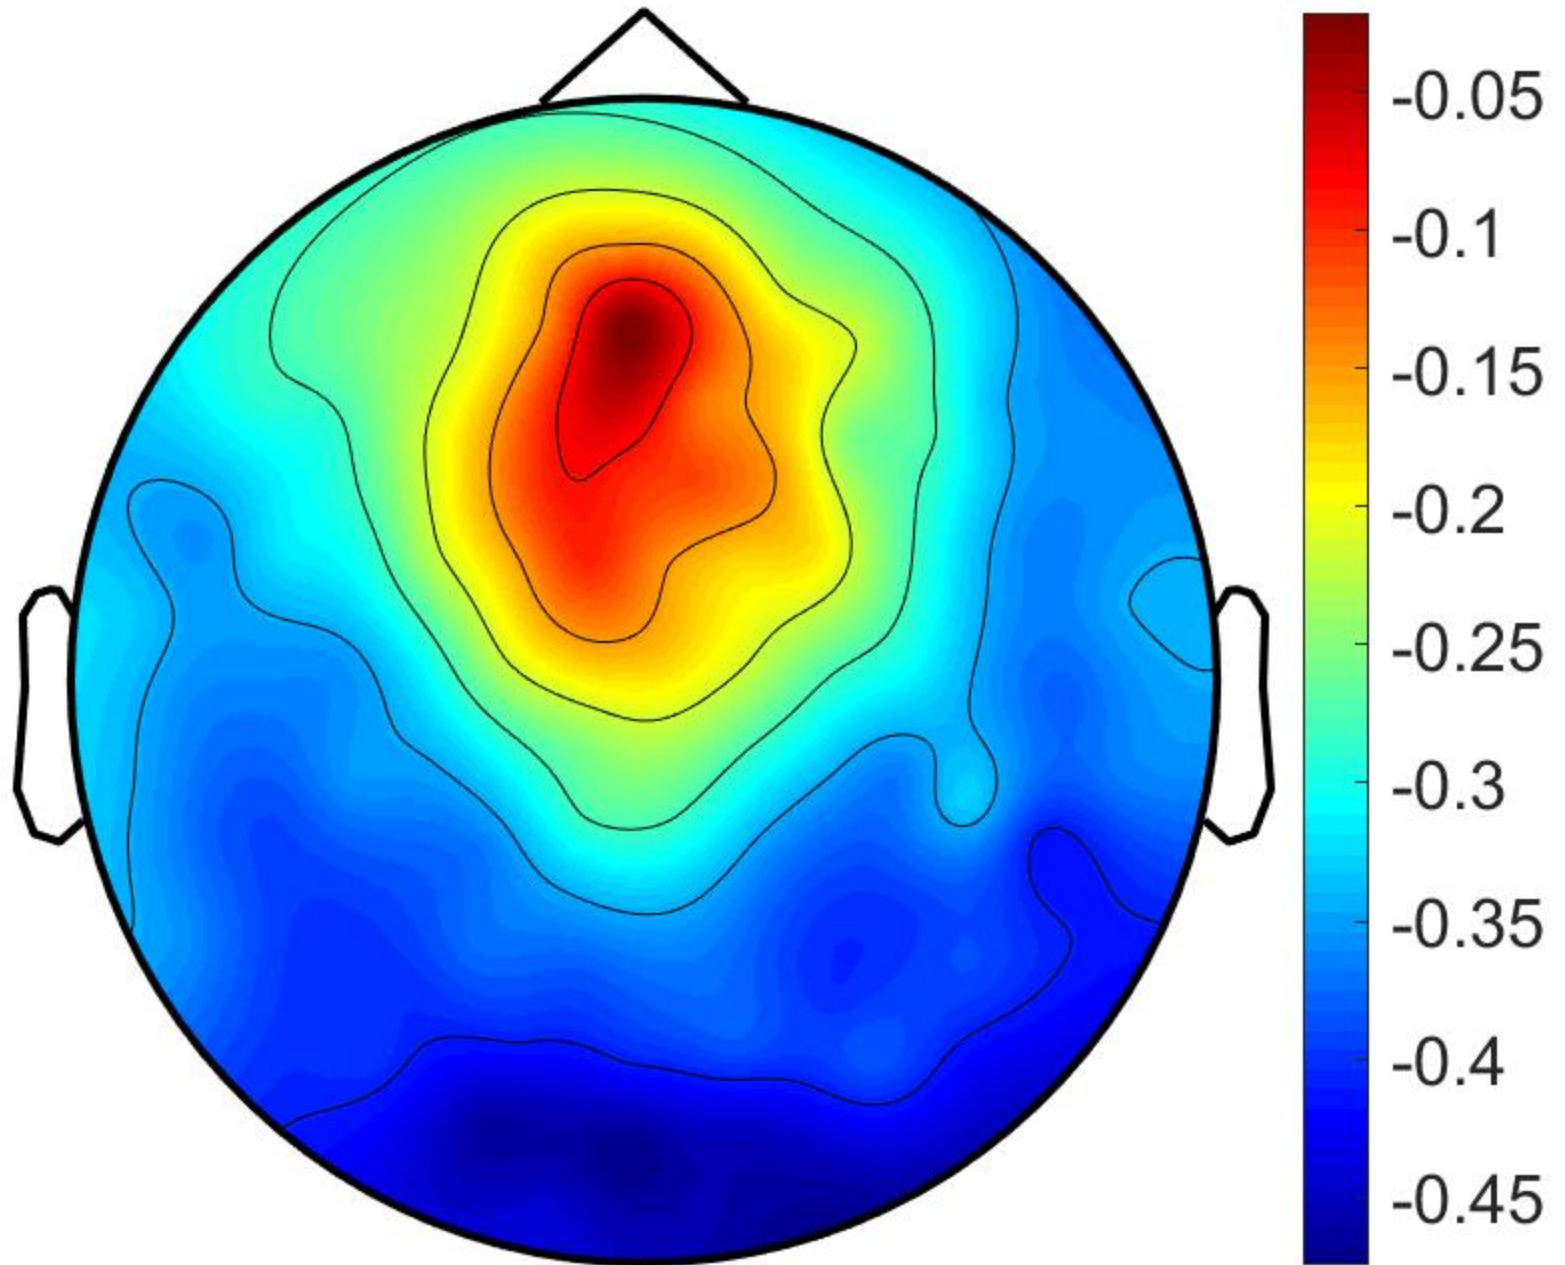

**Fig. S2** represents Sensor topography of correlation between peak alpha frequency and age. Colorbar represents Spearman's rank correlation value.

## Supplementary Table 1.

|                      | <i>Measure</i>                             | F(1,648)(p=value) | beta1            | R <sup>2</sup> |
|----------------------|--------------------------------------------|-------------------|------------------|----------------|
| <b>POWER</b>         | Delta Power                                | 2.61(0.1)         | 0.008(0.1)       | 0.004          |
|                      | Theta Power                                | 0.546(0.46)       | 0.004(0.46)      | 0.0008         |
|                      | Alpha Power                                | 0.08(0.76)        | 0.0002(0.76)     | 0.0001         |
|                      | Beta Power                                 | 41.3(<0.0001)     | 0.03(<0.0001)    | 0.06           |
| <b>COHERENCE</b>     | Global Coherence(Delta)                    | 22(<0.0001)       | 0.0005(<0.0001)  | 0.03           |
|                      | Global Coherence(Theta)                    | 6.76(<0.0001)     | 0.0002(<0.009)   | 0.01           |
|                      | Global Coherence(Alpha)                    | 60(<0.0001)       | -0.0008(<0.0001) | 0.084          |
|                      | Global Coherence(Beta)                     | 0.03(0.86)        | ~0(0.86)         | ~0             |
| <b>METASTABILITY</b> | Metastability(Delta)                       | 95(<0.0001)       | 0.0004(<0.0001)  | 0.128          |
|                      | Metastability(Theta)                       | 105(<0.0001)      | 0.0004(<0.0001)  | 0.139          |
|                      | Metastability(Alpha)                       | 77.5(<0.0001)     | 0.0003(<0.0001)  | 0.107          |
|                      | Metastability(Beta)                        | 21.6(<0.0001)     | 0.0001(<0.0001)  | 0.032          |
|                      | Peak Alpha Frequency                       | 109(0.0001)       | -0.01(<0.0001)   | 0.144          |
|                      | Alpha-Beta topographical segregation index | 65.7(<0.0001)     | 0.003(<0.0001)   | 0.09           |

**T1.** Statistical table for power, coherence and metastability measures. F-values, beta coefficients and goodness of fit for linear regression based analysis are reported.

Supplementary Table 2.

| <b>Beta Power</b> | <b>YA</b> | <b>ME</b>              | <b>ML</b>            | <b>OA</b>             |
|-------------------|-----------|------------------------|----------------------|-----------------------|
| <b>YA</b>         |           | <0.001, -0.48, -0.9679 | <0.001, -0.61, -1.28 | <0.001, -0.83, -1.73  |
| <b>ME</b>         |           |                        | <0.21, -0.14, -0.3   | <0.0016, -0.34, -0.76 |
| <b>ML</b>         |           |                        |                      | <0.06, -0.19, -0.4496 |

**T2.** Tabulates the between group test for beta power. 10000 iterations were performed to generate surrogate data for each comparison. Reported values correspond to p-values, effect size, group difference in means in that order.



Supplementary Table 3.

Peak Alpha Frequency(PAF) Categorical Analysis

| PAF | YA | ME                   | ML                   | OA                   |
|-----|----|----------------------|----------------------|----------------------|
| YA  |    | 0.02, 0.2674, -0.193 | <0.001, -0.61, -1.28 | <0.001, -0.83, -1.73 |
| ME  |    |                      | 0.21, -0.14, -0.3    | 0.0016, -0.34, -0.76 |
| ML  |    |                      |                      | 0.06, -0.19, -0.4496 |

\*p-value, effect size, group difference in means

**T3.** Tabulates the between group test for peak alpha frequency(PAF). 10000 iterations were performed to generate surrogate data for each comparison. Reported values correspond to p-values, effect size, group difference in means in that order.

## Supplementary Table 4.

### Alpha-Beta Topographical segregation

| <b>ANG_SEP</b> | <b>YA</b> | <b>ME</b>                  | <b>ML</b>                      | <b>OA</b>                      |
|----------------|-----------|----------------------------|--------------------------------|--------------------------------|
| <b>YA</b>      |           | <b>0.03 , -0.25, -2.81</b> | <b>&lt;0.001, -0.47, -5.55</b> | <b>&lt;0.001, -0.77, -9.06</b> |
| <b>ME</b>      |           |                            | <b>0.03 , -0.24, -2.7</b>      | <b>&lt;0.001, -0.55, -6.24</b> |
| <b>ML</b>      |           |                            |                                | <b>0.0064, -0.289, -3.5</b>    |

**T4.** Tabulates the between group test for alpha-beta segregation measure. 10000 iterations were performed to generate surrogate data for each comparison. Reported values correspond to p-values, effect size, group difference in means in that order.

Supplementary Table 5.

Global Coherence Categorical Analysis

| <b>Delta</b> | YA | ME                   | ML                   | OA                   |  | <b>Theta</b> | YA | ME                 | ML                | OA                  |
|--------------|----|----------------------|----------------------|----------------------|--|--------------|----|--------------------|-------------------|---------------------|
| YA           |    | 0.88 , -0.01, 0.0006 | 0.24, -0.15 -0.006   | 0.0003, -0.48, -0.02 |  | YA           |    | 0.6 , -0.06, 0.001 | 0.43, 0.09, 0.002 | 0.05, -0.25, -0.009 |
| ME           |    |                      | 0.21 , -0.14, -0.006 | <0.001, -0.43, -0.02 |  | ME           |    |                    | 0.8, 0.02, 0.0009 | 0.01, -0.26, -0.011 |
| ML           |    |                      |                      | 0.011, -0.28, -0.01  |  | ML           |    |                    |                   | 0.01, -0.29, -0.01  |
| <b>Alpha</b> | YA | ME                   | ML                   | OA                   |  | <b>Beta</b>  | YA | ME                 | ML                | OA                  |
| YA           |    | 0.1 , 0.18, 0.01     | <0.001, 0.63, 0.03   | <0.001, 0.73, 0.03   |  | YA           |    | 0.36, 0.1, 0.002   | 0.03, 0.25, 0.005 | 0.78, 0.031, 0.0007 |
| ME           |    |                      | 0.0002 , 0.43, 0.02  | <0.001, 0.52, 0.02   |  | ME           |    |                    | 0.16, 0.15, 0.003 | 0.52, -0.06, -0.001 |
| ML           |    |                      |                      | 0.4, 0.08, 0.003     |  | ML           |    |                    |                   | 0.04, -0.2, -0.005  |

**T5.** Tabulates the between group test for global coherence measure. 10000 iterations were performed to generate surrogate data for each comparison. Reported values correspond to p-values, effect size, group difference in means in that order.

# Supplementary Table 6.

# Metastability Categorical Analysis

| <b>Delta</b> | <b>YA</b> | <b>ME</b>            | <b>ML</b>             | <b>OA</b>             |  | <b>Theta</b> | <b>YA</b> | <b>ME</b>             | <b>ML</b>             | <b>OA</b>            |
|--------------|-----------|----------------------|-----------------------|-----------------------|--|--------------|-----------|-----------------------|-----------------------|----------------------|
| <b>YA</b>    |           | 0.007, -0.32, -0.004 | <0.001, -0.66, 0.01   | <0.001, -1.0, -0.01   |  | <b>YA</b>    |           | <0.001, -0.41, -0.006 | <0.001, -0.74, -0.01  | <0.001, -1.15, -0.02 |
| <b>ME</b>    |           |                      | 0.002, -0.33, -0.006  | <0.001, -0.74, -0.01  |  | <b>ME</b>    |           |                       | 0.003, -0.33, -0.006  | <0.001, -0.73, -0.01 |
| <b>ML</b>    |           |                      |                       | 0.0006, -0.39, -0.008 |  | <b>ML</b>    |           |                       |                       | <0.001, -0.4, -0.009 |
| <b>Alpha</b> | <b>YA</b> | <b>ME</b>            | <b>ML</b>             | <b>OA</b>             |  | <b>Beta</b>  | <b>YA</b> | <b>ME</b>             | <b>ML</b>             | <b>OA</b>            |
| <b>YA</b>    |           | 0.02, -0.27, -0.003  | <0.001, -0.62, -0.009 | <0.001, -0.96, -0.01  |  | <b>YA</b>    |           | 0.04, -0.24, -0.003   | 0.03, -0.26, -0.003   | <0.001, -0.6, -0.009 |
| <b>ME</b>    |           |                      | 0.004, 0.32, 0.005    | <0.001, -0.67, -0.01  |  | <b>ME</b>    |           |                       | 0.82, -0.025, -0.0004 | 0.002, -0.33, -0.006 |
| <b>ML</b>    |           |                      |                       | 0.0003, -0.38, -0.007 |  | <b>ML</b>    |           |                       |                       | 0.006, -0.29, -0.005 |

**T6.** Tabulates the between group test for metastability measure. 10000 iterations were performed to generate surrogate data for each comparison. Reported values correspond to p-values, effect size, group difference in means in that order.

S.3

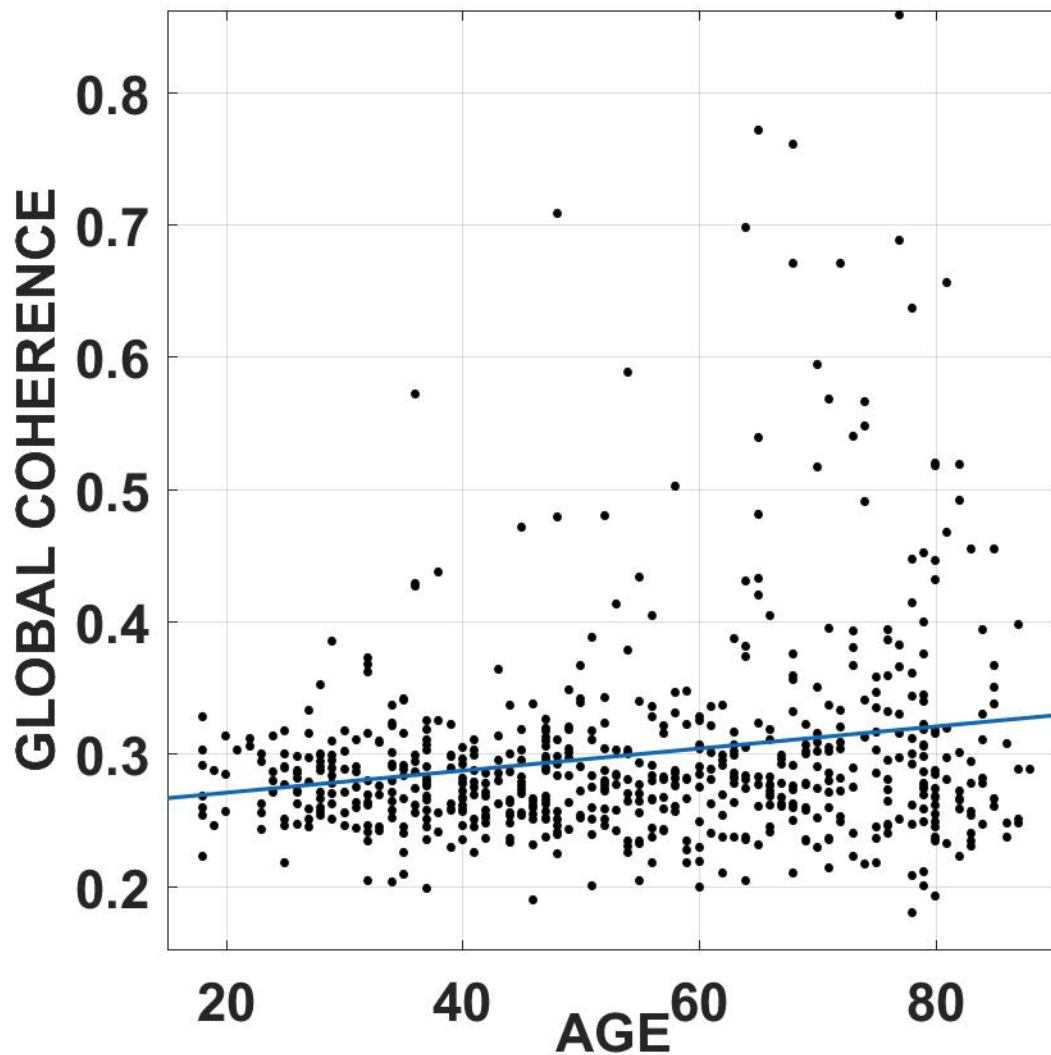

**Fig S3.** represents a scatter plot of Global Coherence in theta band(3-7Hz) (ICA CORRECTED) as a function of age. ECG and EOG signals were subtracted from the data using an automated ICA procedure as outlined in the main text.

S4.

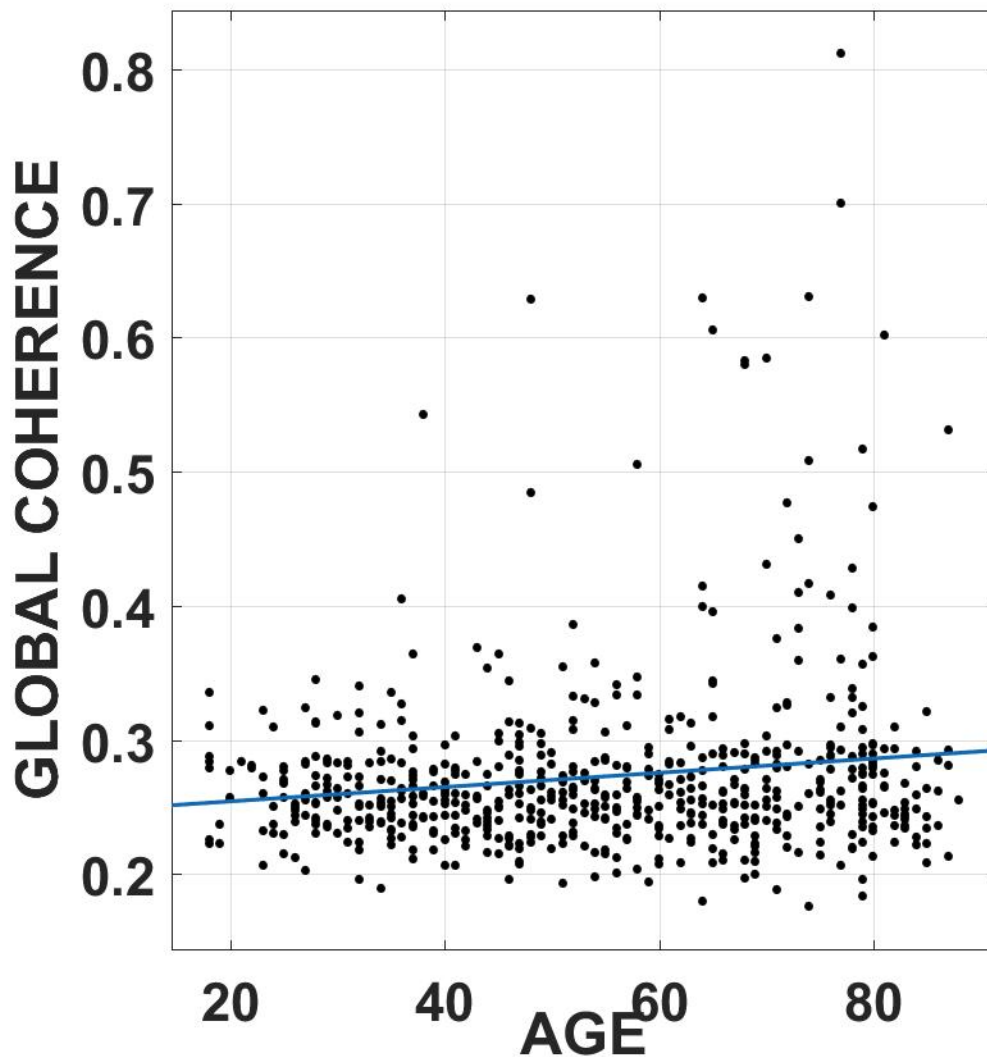

**Fig.S4** represents a scatter plot of Global Coherence in alpha band(8-12Hz) (ICA CORRECTED) as a function of age. ECG and EOG signals were subtracted from the data using an automated ICA procedure as outlined in the main text.

S5.

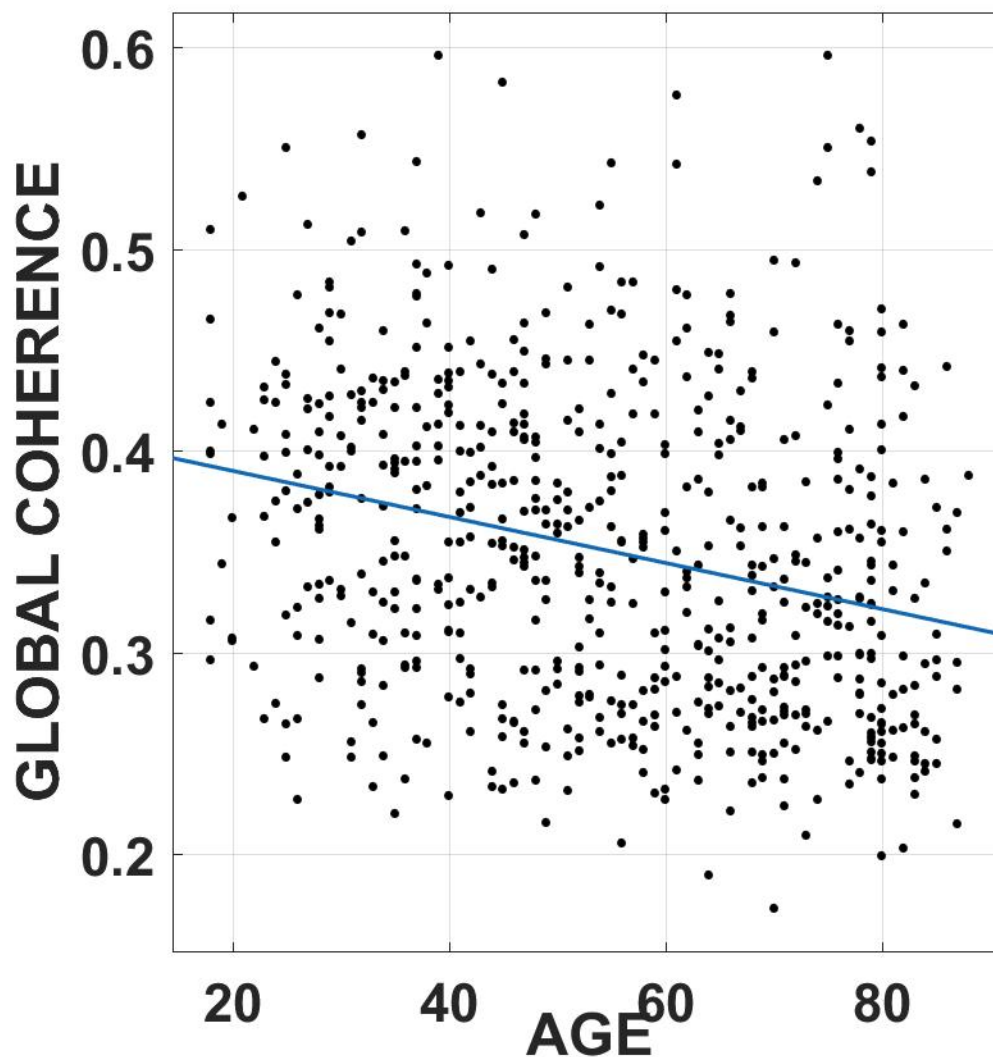

**Fig.S5** represents a scatter plot of Global Coherence in alpha band(8-12Hz) (ICA CORRECTED) as a function of age. ECG and EOG signals were subtracted from the data using an automated ICA procedure as outlined in the main text.



S6.

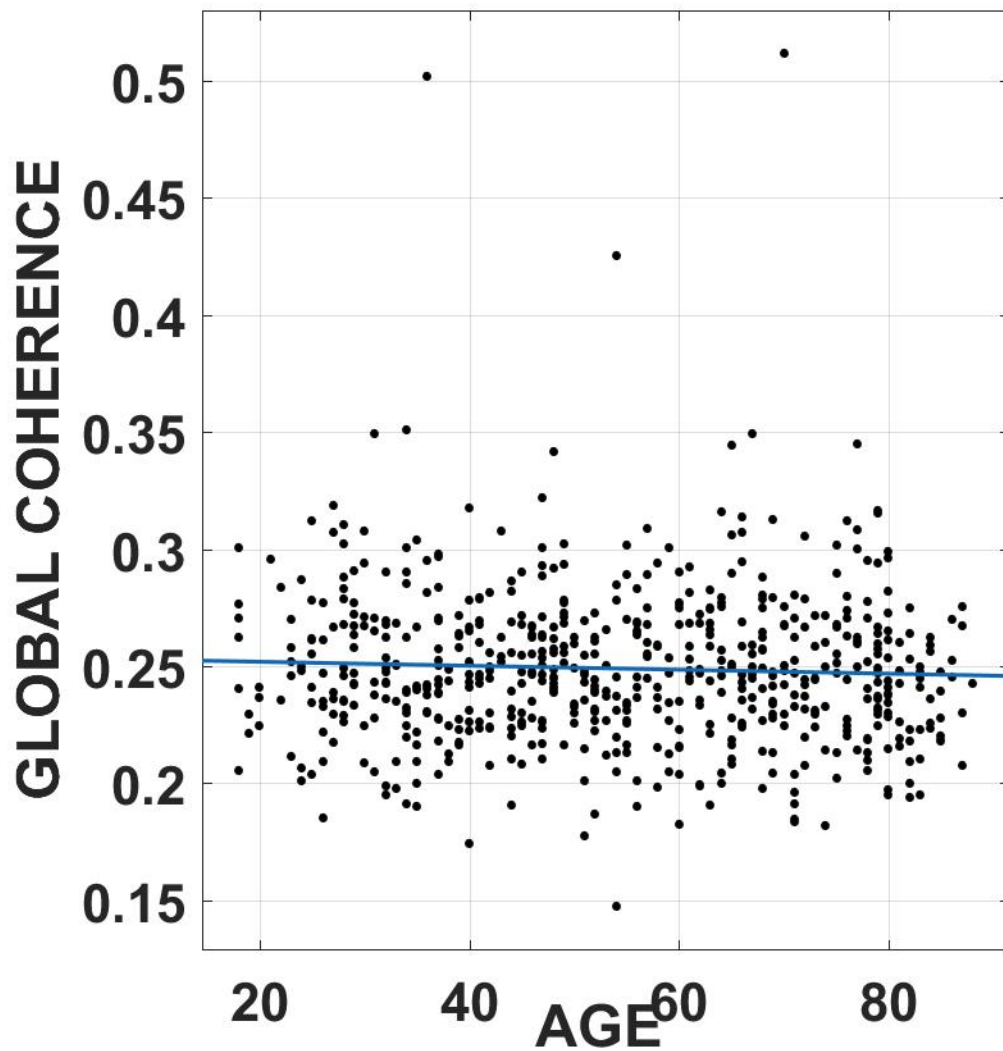

**Fig.S6** represents a scatter plot of Global Coherence in beta band(16-25Hz) (ICA CORRECTED) as a function of age. ECG and EOG signals were subtracted from the data using an automated ICA procedure as outlined in the main text.

# S7.

bioRxiv preprint doi: <https://doi.org/10.1101/504589>; this version posted March 31, 2020. The copyright holder for this preprint (which was not certified by peer review) is the author/funder, who has granted bioRxiv a license to display the preprint in perpetuity. It is made available under aCC-BY-NC-ND 4.0 International license.

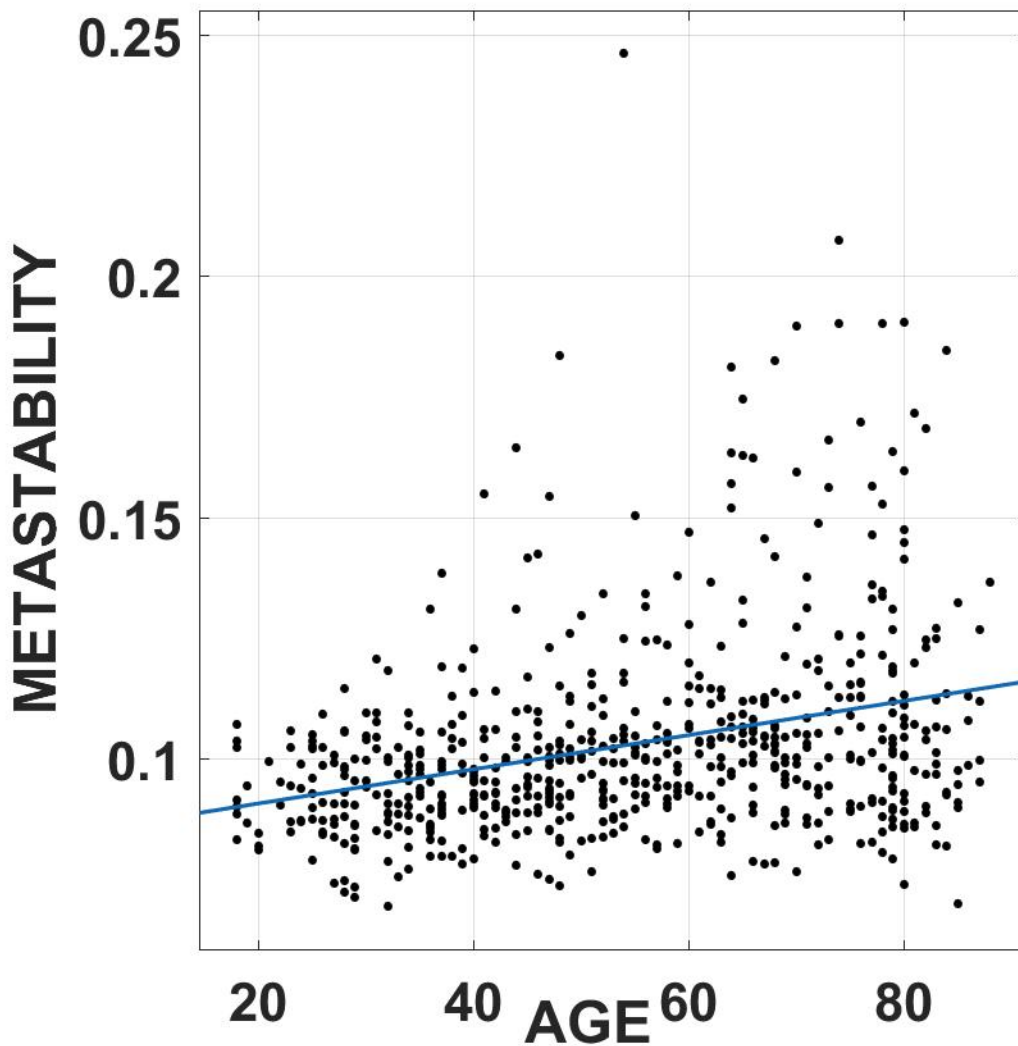

**Fig. S7** Represents a scatter plot of metastability in delta band(1-3Hz) (ICA CORRECTED) as a function of age. ECG and EOG signals were subtracted from the data using an automated ICA procedure as outlined in the main text.

# S8.

bioRxiv preprint doi: <https://doi.org/10.1101/504589>; this version posted March 31, 2020. The copyright holder for this preprint (which was not certified by peer review) is the author/funder, who has granted bioRxiv a license to display the preprint in perpetuity. It is made available under aCC-BY-NC-ND 4.0 International license.

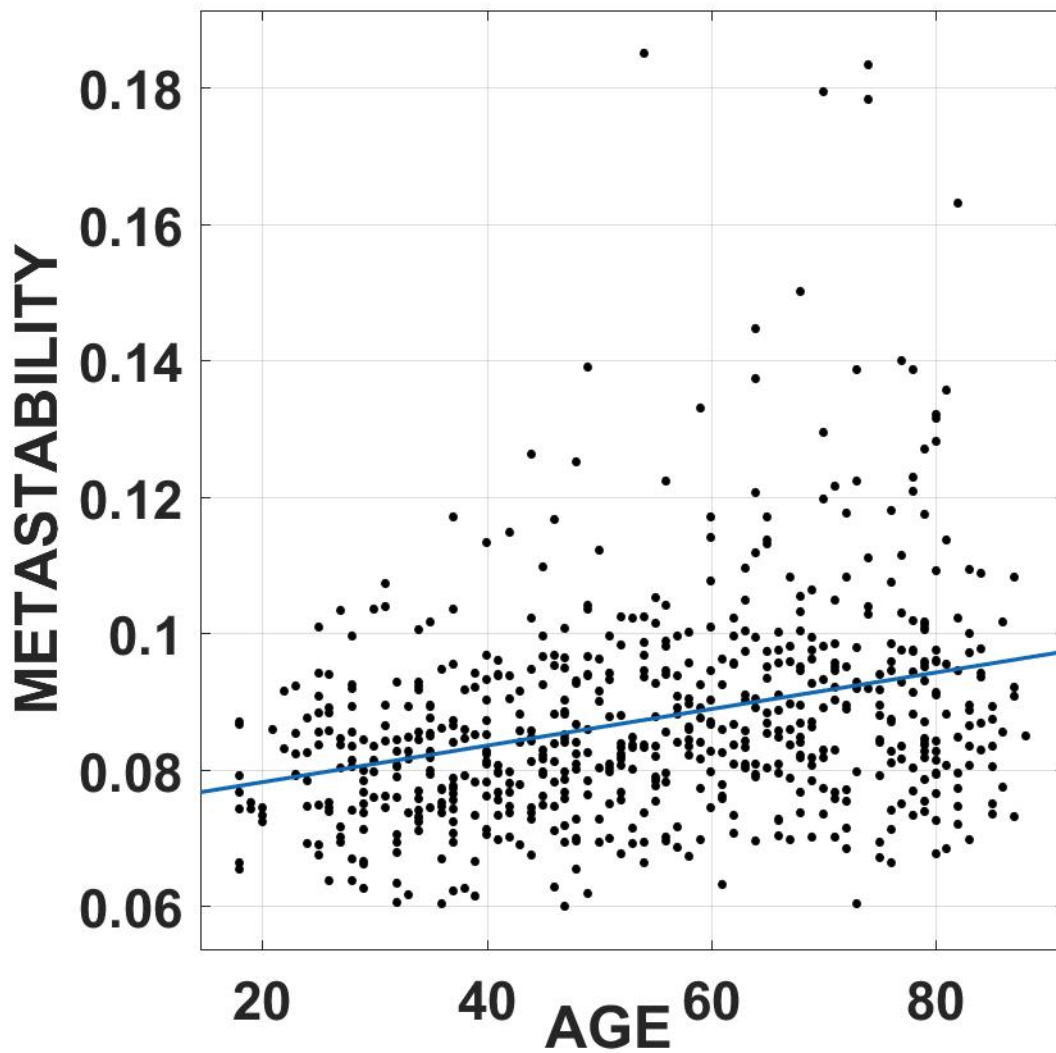

**Fig. S8** represents a scatter plot of metastability in alpha band(8-12Hz) (ICA CORRECTED) as a function of age. ECG and EOG signals were subtracted from the data using an automated ICA procedure as outlined in the main text.

# S9.

bioRxiv preprint doi: <https://doi.org/10.1101/504589>; this version posted March 31, 2020. The copyright holder for this preprint (which was not certified by peer review) is the author/funder, who has granted bioRxiv a license to display the preprint in perpetuity. It is made available under aCC-BY-NC-ND 4.0 International license.

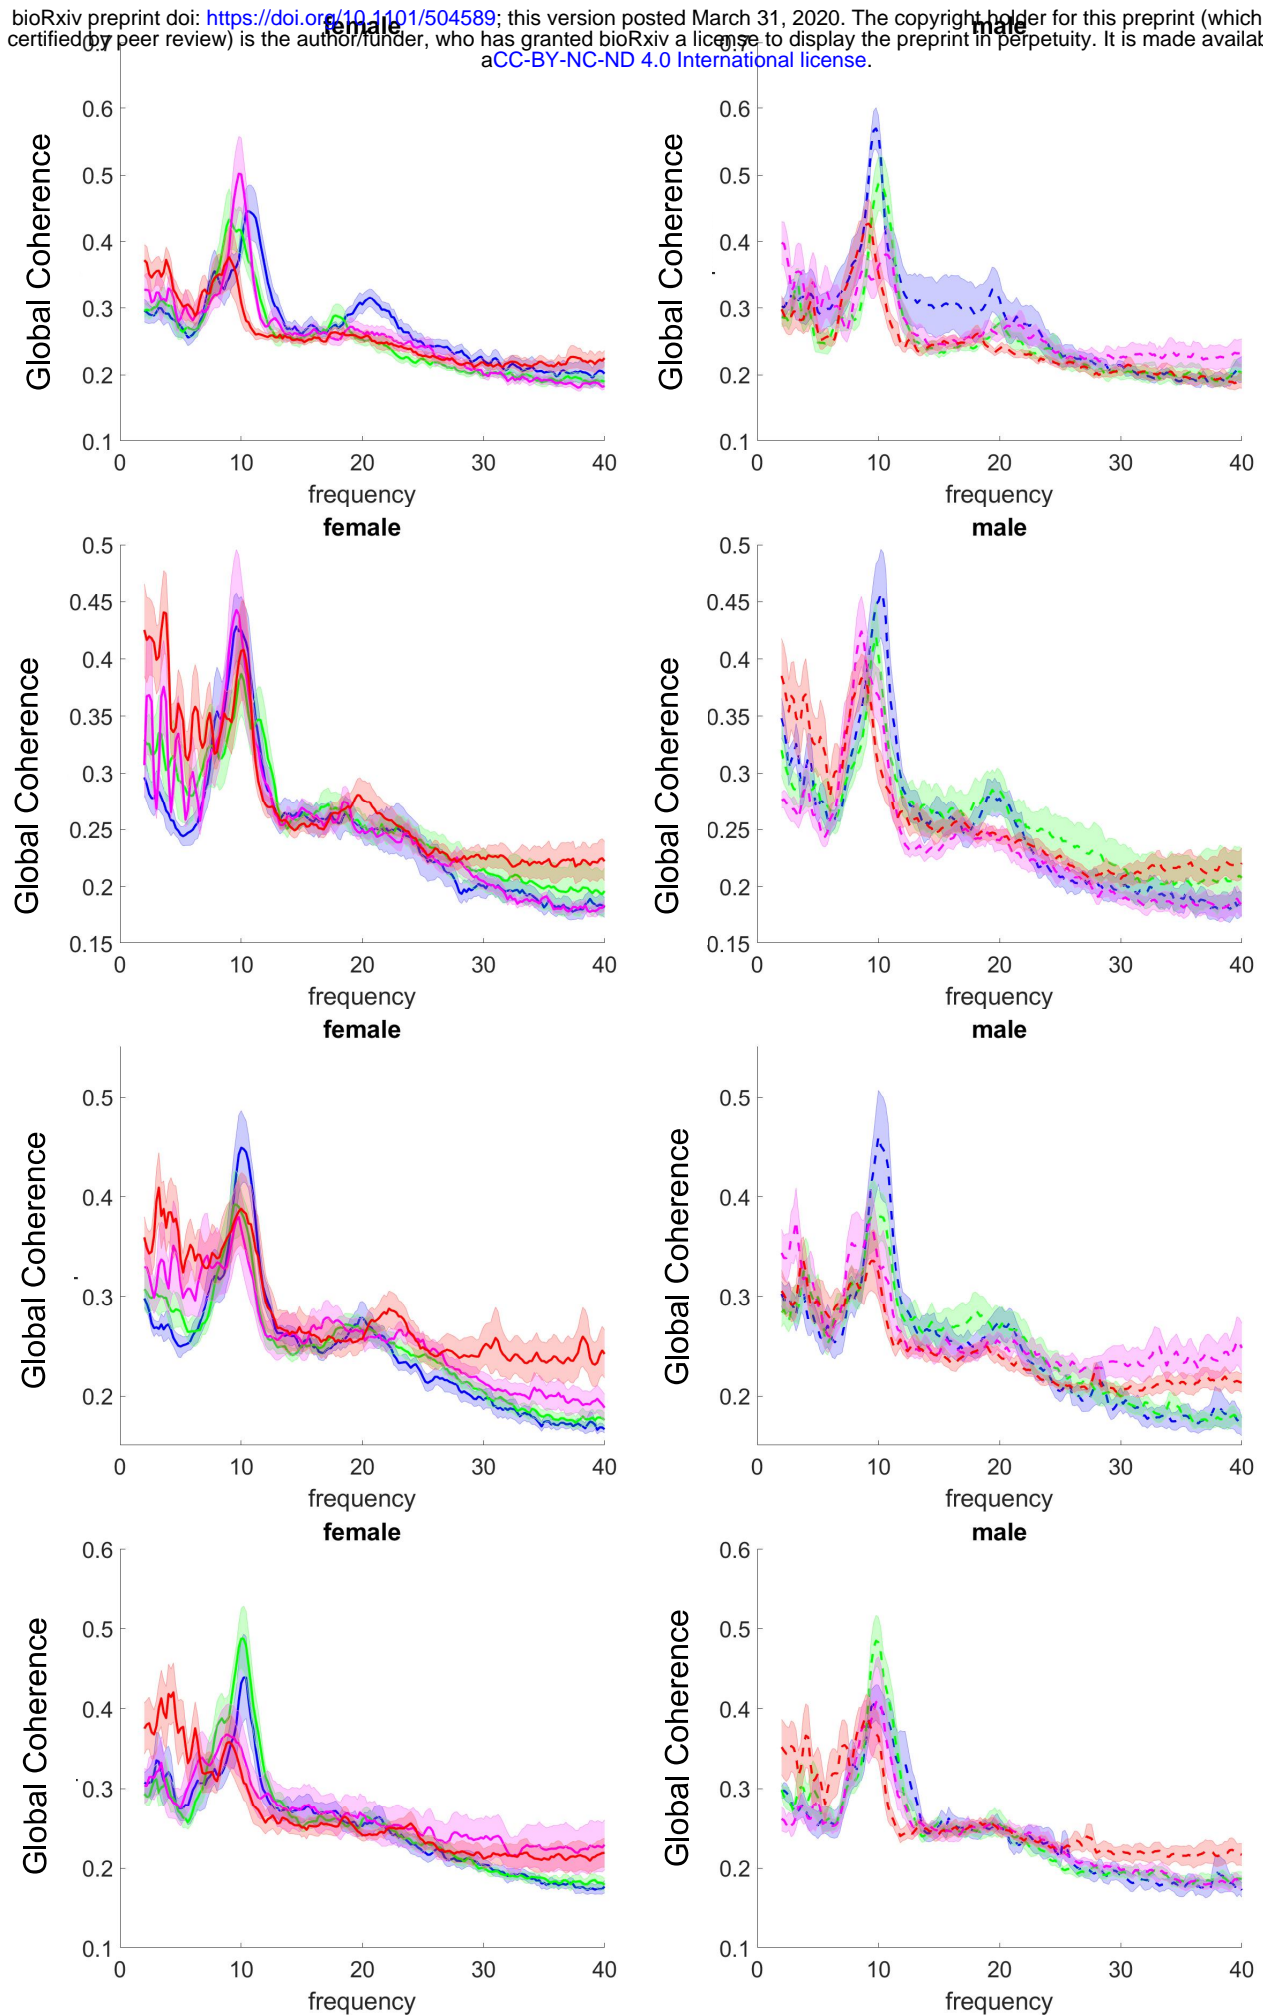

**Fig. S9** represents Gender-wise comparison of randomly sampled age groups. 50 samples were drawn at random from each age-group and GC calculated.

# S10.

bioRxiv preprint doi: <https://doi.org/10.1101/504589>; this version posted March 31, 2020. The copyright holder for this preprint (which was not certified by peer review) is the author/funder, who has granted bioRxiv a license to display the preprint in perpetuity. It is made available under aCC-BY-NC-ND 4.0 International license.

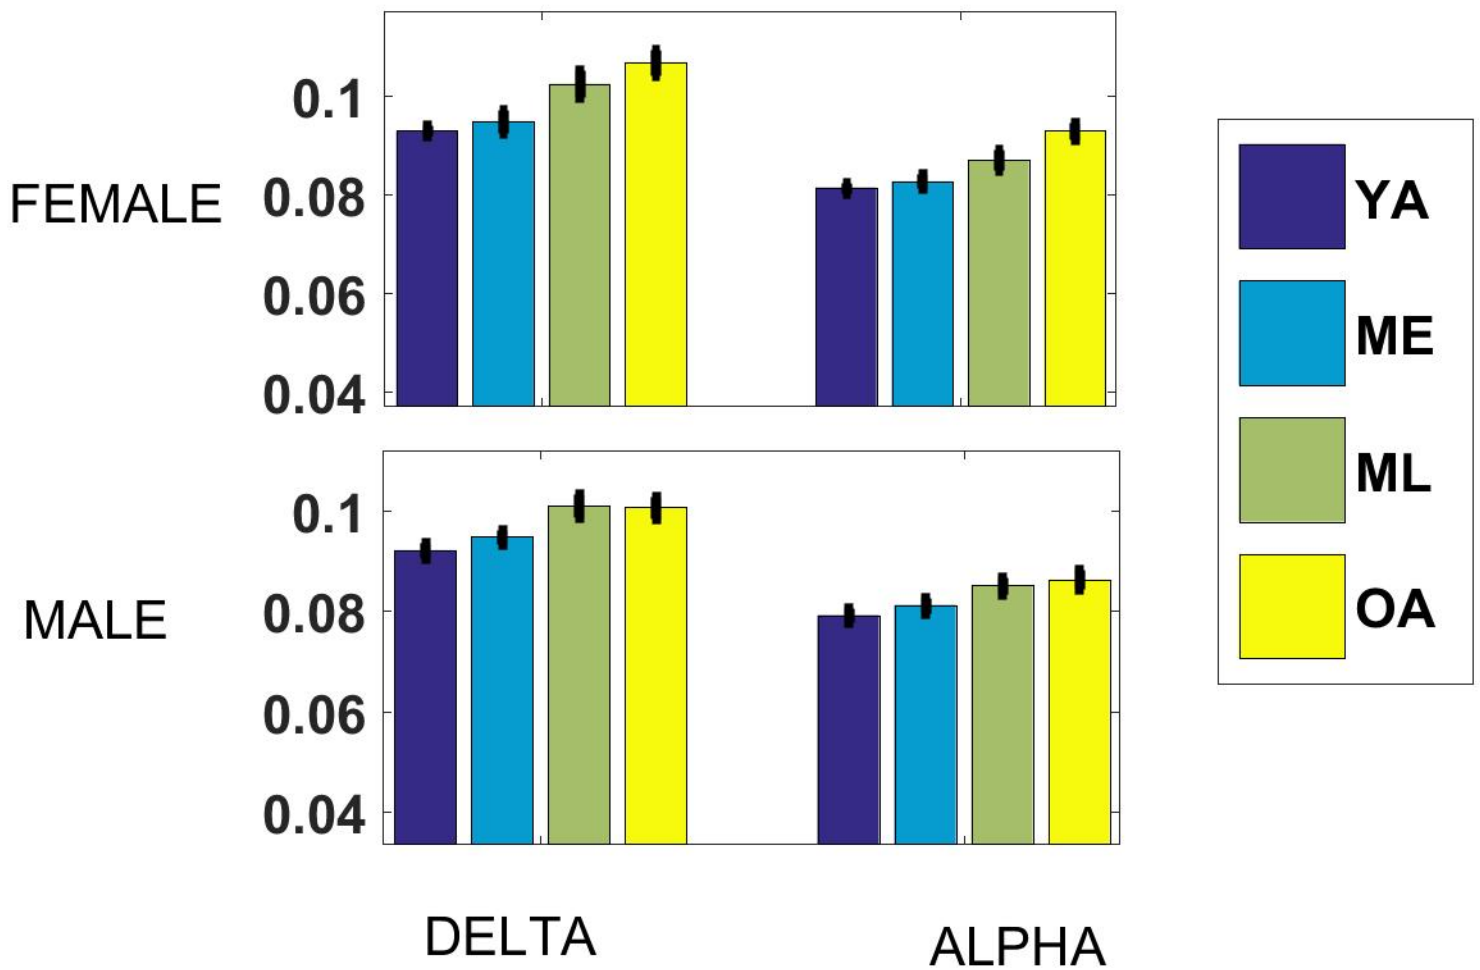

**Fig. S10** Gender-wise metastability in delta and alpha band. Data consisted of 328 Males and 322 Females. Bar plots represent metastability in the delta and theta bands for the 4 age groups.

## Supplementary Table 7.

| GLOBAL COHERENCE |         |      |
|------------------|---------|------|
| BAND             | RHO     | P    |
| DELTA            | -0.0018 | 0.96 |
| THETA            | 0.01    | 0.72 |
| ALPHA            | 0.09    | 0.01 |
| BETA             | 0.08    | 0.06 |
| METASTABILITY    |         |      |
| BAND             | RHO     | P    |
| DELTA            | 0.04    | 0.27 |
| THETA            | 0.04    | 0.24 |
| ALPHA            | 0.03    | 0.03 |
| BETA             | 0.01    | 0.79 |

**T7.**Rho and P-val for partial correlation between precision in VSTM task and frequency-specific coherence and metastability(age regressed out).
